# Supplementary material for: Light reintroduction after dark exposure reactivates plasticity in adults via perisynaptic activation of MMP-9
Source: eLife. 2017 Sep 6;6:e27345. doi: 10.7554/eLife.27345 (PMC5630258; doi:10.7554/eLife.27345)
Supplement: Figure 1—source data 1. [file elife-27345-fig1-data1.xlsx]

## Sheet: 1G
WFA	micron	Con mean	DE mean	LRx mean	Con+sem	Com-sem	DE+sem	DE-sem	LRx+sem	LRx-sem		PV	micron	Con mean	DE mean	LRx mean	Con+sem	Com-sem	DE+sem	DE-sem	DEL+sem	DEL-sem
	0	58.1037	60.3265	46.951	61.8891	54.3182	66.7685	53.8846	49.0192	44.8827			0	21.478	22.4086	10.6353	28.6671	14.2889	28.6818	16.1354	21.2834	-0.0127414
	1.3824	58.348	62.079	49.3515	62.2258	54.4702	67.5887	56.5693	51.3447	47.3583			1.3824	20.6743	22.308	10.8334	27.1754	14.1732	29.4455	15.1706	21.9116	-0.244832
	2.7648	59.2276	62.4969	50.4268	63.1302	55.325	68.63	56.3638	52.1423	48.7114			2.7648	19.9564	21.0944	11.0507	25.5811	14.3316	28.9485	13.2404	22.4092	-0.307756
	4.1473	59.5109	61.9778	51.4961	62.9886	56.0331	67.8379	56.1177	52.7526	50.2397			4.1473	18.6293	19.7117	11.6819	24.3786	12.88	27.319	12.1044	22.5985	0.765208
	5.5297	58.8767	61.2852	52.0945	61.9232	55.8302	66.8528	55.7176	53.5627	50.6264			5.5297	17.5543	17.7587	12.6716	23.8047	11.304	24.1666	11.3507	23.1794	2.16376
	6.9121	57.9455	59.758	51.9487	60.7254	55.1656	65.2787	54.2374	54.1841	49.7133			6.9121	16.8103	15.5531	13.4029	22.8368	10.7838	20.9685	10.1377	24.0057	2.80002
	8.2945	58.3542	61.9081	52.8364	60.7936	55.9148	67.3365	56.4796	56.3441	49.3288			8.2945	15.9693	15.2981	14.2148	21.6932	10.2453	20.6576	9.93869	24.6039	3.82574
	9.677	58.9423	60.6568	54.543	61.2015	56.683	65.2993	56.0143	58.7896	50.2964			9.677	15.5245	15.4654	15.0345	20.9388	10.1101	20.809	10.1218	24.6879	5.3811
	11.0594	58.009	61.7136	54.9427	60.1107	55.9074	67.0641	56.3631	59.8924	49.9929			11.0594	14.7871	16.0593	16.1957	20.2057	9.36857	21.3711	10.7474	25.4213	6.97021
	12.4418	58.1855	63.2068	56.2995	60.0613	56.3097	68.5611	57.8524	61.8478	50.7512			12.4418	13.8536	15.887	17.2599	19.1185	8.58862	21.4754	10.2987	26.3543	8.16551
	13.8242	57.1686	63.5444	56.4038	59.0646	55.2725	69.4216	57.6673	62.1379	50.6698			13.8242	13.2408	16.4136	18.3129	18.8451	7.63647	22.363	10.4642	26.9687	9.65719
	15.2066	55.9733	63.6475	55.64	57.9855	53.961	68.7335	58.5616	61.9872	49.2929			15.2066	12.9564	15.9808	19.6614	18.3092	7.60356	22.2887	9.67295	27.6981	11.6246
	16.5891	55.6435	62.2352	56.4891	57.589	53.6979	66.8068	57.6636	62.9114	50.0668			16.5891	12.8459	15.6148	19.6153	18.4004	7.29138	22.091	9.13863	26.6859	12.5448
	17.9715	56.1569	62.7975	57.5328	57.9736	54.3402	66.845	58.75	63.8771	51.1885			17.9715	12.8259	15.9389	19.4287	19.1067	6.54502	22.8129	9.06486	26.3958	12.4617
	19.3539	56.3649	65.2204	57.8	58.1574	54.5724	68.7959	61.6449	64.0029	51.5971			19.3539	12.7573	15.887	19.1203	18.4488	7.0659	22.5622	9.21188	25.9385	12.302
	20.7363	56.1805	64.3111	57.1625	57.9357	54.4254	67.6185	61.0038	63.1517	51.1734			20.7363	12.6913	15.1025	18.6713	18.1628	7.21967	21.4649	8.74003	24.8571	12.4854
	22.1187	56.6215	64.0963	56.6843	58.3456	54.8974	67.7325	60.4601	62.1125	51.2561			22.1187	12.7678	15.2945	17.6681	18.4054	7.13018	21.6606	8.92834	23.156	12.1802
	23.5012	55.4607	63.6019	56.8536	57.2502	53.6713	66.8011	60.4026	62.0646	51.6426			23.5012	12.938	14.8315	17.0951	18.3617	7.51423	20.7609	8.90208	22.3384	11.8518
	24.8836	54.2179	60.8457	57.1465	56.0881	52.3477	64.53	57.1613	62.3142	51.9788			24.8836	13.2602	13.7333	16.8312	18.7182	7.80217	19.0349	8.43171	21.8987	11.7637
	26.266	55.1504	63.5846	58.074	57.1363	53.1644	67.7363	59.4329	63.1895	52.9584			26.266	13.6029	13.2408	16.7914	19.1095	8.09634	18.2387	8.2428	21.8043	11.7784
	27.6484	56.0785	62.2629	57.8354	58.0945	54.0624	65.6241	58.9018	62.6278	53.043			27.6484	13.5971	13.1926	16.3503	18.9787	8.2156	18.257	8.12814	21.5988	11.1019
	29.0309	55.7679	61.4494	56.6212	57.7653	53.7706	64.7612	58.1376	61.3791	51.8632			29.0309	13.5844	12.7772	16.1945	18.8788	8.28999	17.5039	8.05043	21.1503	11.2388
	30.4133	54.3865	61.8253	57.32	56.4082	52.3649	64.8486	58.802	62.2514	52.3887			30.4133	13.8717	12.0352	16.3833	19.0944	8.64904	16.3389	7.73146	21.261	11.5055
	31.7957	55.3744	62.4753	58.8344	57.5179	53.2309	65.8873	59.0633	63.7128	53.956			31.7957	14.3953	11.4796	16.0866	19.9372	8.85352	15.3914	7.56791	20.8686	11.3046
	33.1781	56.5417	61.2451	57.686	58.696	54.3873	64.9418	57.5483	62.2558	53.1161			33.1781	14.4789	10.9346	15.5615	19.6895	9.26824	14.5031	7.36606	19.5676	11.5554
	34.5605	55.5483	60.766	58.2382	57.7522	53.3443	64.1969	57.3352	62.4171	54.0593			34.5605	14.6045	10.5364	14.9741	19.5671	9.642	13.8936	7.17922	19.2754	10.6728
	35.943	54.4286	60.1154	57.7012	56.5579	52.2992	63.4385	56.7924	61.1969	54.2055			35.943	14.6758	10.8654	14.0515	19.8166	9.53498	14.2947	7.4361	18.6093	9.49365
	37.3254	54.6947	61.5074	57.772	56.9109	52.4784	65.1286	57.8863	60.9617	54.5822			37.3254	14.8363	10.7673	13.6621	20.4123	9.26027	14.1995	7.33502	18.0349	9.28921
	38.7078	54.9787	60.9636	57.4748	57.313	52.6445	64.8301	57.097	60.5233	54.4262			38.7078	15.0538	10.3346	13.4629	20.2021	9.90553	13.5219	7.14726	17.5308	9.39498
	40.0902	55.0232	61.2475	56.8286	57.339	52.7073	64.6938	57.8013	59.7603	53.8968			40.0902	15.1423	10.5512	13.4321	19.8251	10.4595	13.6868	7.41571	17.7842	9.0799
	41.4727	56.3088	59.1531	56.9487	58.5313	54.0864	62.3942	55.9119	59.9389	53.9586			41.4727	15.2206	10.7389	13.5323	20.8909	9.5503	13.9841	7.49366	18.0551	9.00946
	42.8551	55.9873	58.7086	56.8044	58.2414	53.7332	62.2091	55.2081	59.698	53.9108			42.8551	15.5299	10.8765	13.5336	21.2556	9.80418	14.0947	7.65836	18.0331	9.03417
	44.2375	55.0803	56.9803	57.1112	57.4833	52.6774	60.539	53.4216	59.8676	54.3548			44.2375	15.9844	11.3457	13.1565	21.1593	10.8096	14.8356	7.85581	17.6049	8.70806
	45.6199	55.2544	57.6364	56.4531	57.6849	52.8239	60.8421	54.4307	59.1446	53.7615			45.6199	16.3823	12.079	13.3028	21.3079	11.4567	15.8144	8.34365	17.7491	8.85651
	47.0023	56.3193	58.0253	56.6162	58.7045	53.934	61.1969	54.8537	59.4023	53.83			47.0023	16.7321	11.8586	14.0027	22.2801	11.184	15.4404	8.27691	18.4814	9.52405
	48.3848	56.7628	59.5833	56.2705	59.144	54.3815	62.663	56.5037	59.039	53.502			48.3848	16.8785	11.6901	14.1285	22.2665	11.4904	15.0965	8.28372	18.6575	9.59946
	49.7672	56.9616	60.9691	57.0328	59.3013	54.6218	65.298	56.6403	59.6835	54.3821			49.7672	16.9741	11.992	14.0459	22.1445	11.8037	15.4667	8.51722	18.789	9.30283
	51.1496	55.6866	59.3148	55.9278	57.8882	53.485	62.5456	56.084	58.4626	53.3931			51.1496	17.1095	12.0908	14.0374	22.7535	11.4656	15.7491	8.43247	18.5712	9.5035
	52.532	55.2169	61.0611	56.0439	57.3113	53.1226	64.7869	57.3353	58.5522	53.5356			52.532	17.1871	12.3685	14.1102	22.9989	11.3753	16.0537	8.68335	18.7401	9.48034
	53.9145	56.0288	61.016	56.009	58.1104	53.9473	64.8171	57.215	58.5396	53.4783			53.9145	17.5288	12.6722	14.2183	22.8026	12.255	16.1866	9.15786	19.1373	9.29933
	55.2969	56.37	58.5259	55.2114	58.5742	54.1658	62.2184	54.8334	57.6241	52.7988			55.2969	17.8647	12.9395	14.0428	22.849	12.8805	16.3442	9.53484	18.9568	9.12875
	56.6793	57.3844	59.3796	56.2353	59.6406	55.1282	63.2054	55.5538	58.5426	53.928			56.6793	18.2566	13.2315	13.9583	24.0136	12.4997	16.5942	9.86879	19.0168	8.89981
	58.0617	58.3665	59.2506	56.9709	60.5463	56.1868	64.2891	54.2121	59.2066	54.7352			58.0617	18.5969	13.9062	13.9334	24.5976	12.5963	17.5321	10.2803	19.1886	8.67824
	59.4441	57.4395	58.1019	55.4887	59.6716	55.2074	62.9406	53.2632	57.6715	53.3059			59.4441	18.7189	14.1037	13.9971	24.226	13.2119	17.8451	10.3623	18.8705	9.12371
	60.8266	56.1489	57.2154	55.8314	58.3623	53.9355	61.3805	53.0503	57.8692	53.7936			60.8266	19.0284	14.3623	13.7175	24.3077	13.749	18.3202	10.4045	18.9582	8.47685
	62.209	55.5806	57.7414	57.095	57.8103	53.3509	61.8476	53.6351	59.0868	55.1032			62.209	19.3802	14.8642	13.7145	24.4766	14.2838	18.9421	10.7863	19.0841	8.34495
	63.5914	56.181	57.5272	56.6239	58.5658	53.7961	61.6485	53.4058	58.6095	54.6382			63.5914	19.6335	14.8729	13.8741	24.7675	14.4995	18.8862	10.8595	19.0157	8.73244
	64.9738	57.1282	57.6648	57.0818	59.4816	54.7748	62.1036	53.226	58.9381	55.2255			64.9738	19.8627	14.3037	14.07	25.3835	14.342	18.2158	10.3916	19.5009	8.63916
	66.3562	57.1949	58.0019	56.3795	59.4802	54.9095	62.5322	53.4715	58.283	54.476			66.3562	20.2946	13.9747	14.4924	25.805	14.7843	17.6666	10.2828	19.8476	9.13727
	67.7387	57.5639	55.8864	56.2196	59.9154	55.2124	59.2433	52.5295	58.1229	54.3162			67.7387	20.7989	13.916	14.8415	26.3532	15.2447	17.6737	10.1584	20.057	9.62611
	69.1211	57.9431	58.2889	55.7274	60.3497	55.5365	61.9454	54.6324	57.6846	53.7702			69.1211	21.1531	14.2926	15.1303	26.3495	15.9568	18.2387	10.3465	20.2137	10.0468
	70.5035	56.7864	59.0846	55.2402	59.109	54.4638	63.2407	54.9284	57.1852	53.2952			70.5035	21.2931	14.9543	15.4796	25.8232	16.7631	18.9782	10.9304	20.9067	10.0524
	71.8859	55.3989	58.5593	56.5345	57.7021	53.0958	62.5922	54.5264	58.3734	54.6955			71.8859	21.8391	15.4975	15.5818	26.4059	17.2724	19.6311	11.3639	21.2141	9.94964
	73.2684	56.5291	56.2932	56.689	58.9031	54.1551	60.5187	52.0677	58.393	54.9851			73.2684	22.4116	15.9438	15.3707	27.4096	17.4136	20.1818	11.7058	20.7286	10.0129
	74.6508	57.6083	56.4401	56.8533	60.0571	55.1595	60.2588	52.6214	58.5051	55.2015			74.6508	22.8063	16.0722	15.8204	27.1972	18.4155	20.3919	11.7525	21.322	10.3187
	76.0332	58.0016	59.263	56.5463	60.403	55.6003	62.7831	55.7428	58.1924	54.9002			76.0332	23.2724	16.5019	16.3194	27.5265	19.0183	20.971	12.0327	21.4608	11.1781
	77.4156	57.5856	59.2432	57.0986	59.7758	55.3954	63.703	54.7834	58.6907	55.5064			77.4156	24.0105	17.1691	16.463	29.0176	19.0035	22.1025	12.2358	21.931	10.9949
	78.798	57.5179	58.4451	56.2515	59.6444	55.3914	62.5536	54.3366	57.9215	54.5814			78.798	24.599	18.2833	16.9304	29.5821	19.6158	23.4468	13.1199	22.4114	11.4494
	80.1805	58.3958	61.7228	55.8422	60.5818	56.2099	66.1289	57.3168	57.531	54.1534			80.1805	24.8831	18.3488	17.1727	29.6037	20.1625	23.4006	13.2969	22.2078	12.1375
	81.5629	58.8886	59.2963	56.9006	61.117	56.6601	63.3022	55.2904	58.547	55.2541			81.5629	25.1743	18.1685	17.3893	29.5344	20.8142	23.1974	13.1396	22.4645	12.3141
	82.9453	57.9373	56.621	57.518	60.0421	55.8325	61.1593	52.0827	59.0646	55.9715			82.9453	25.4323	18.2593	17.5585	30.0382	20.8265	23.2187	13.2998	23.0131	12.1039
	84.3277	58.1444	57.0185	57.0918	60.1949	56.0939	61.1324	52.9046	58.6329	55.5507			84.3277	25.6338	18.3617	17.7634	30.7618	20.5058	23.3697	13.3537	23.4969	12.0298
	85.7102	58.4255	57.0562	55.8614	60.5704	56.2807	61.9895	52.1228	57.3712	54.3516			85.7102	25.8874	18.2179	18.2326	31.0845	20.6904	23.1098	13.326	24.2414	12.2238
	87.0926	58.0828	57.0531	58.0061	60.3324	55.8332	61.5121	52.594	59.5178	56.4944			87.0926	25.9454	17.7327	18.78	30.7566	21.1343	22.4704	12.9951	24.6709	12.8892
	88.475	57.8084	56.3469	57.855	60.1606	55.4561	60.5357	52.1581	59.3657	56.3443			88.475	25.7977	17.7759	19.1784	30.5809	21.0146	22.5249	13.027	24.8934	13.4634
	89.8574	58.2094	58.5691	57.1872	60.5394	55.8795	63.6509	53.4874	58.7259	55.6484			89.8574	25.9753	18.0216	19.4155	30.6792	21.2714	22.79	13.2532	25.2677	13.5633
	91.2398	58.14	58.3519	57.3073	60.3497	55.9303	62.8834	53.8203	58.8805	55.7341			91.2398	26.4928	18.8012	19.836	31.5367	21.4489	23.7128	13.8896	25.7401	13.9318
	92.6223	57.9922	60.3062	56.837	59.9896	55.9947	64.7998	55.8125	58.3468	55.3273			92.6223	26.7892	18.8679	20.0404	31.8565	21.722	23.8324	13.9035	25.7113	14.3695
	94.0047	58.0945	59.7179	56.8338	60.1924	55.9967	64.1715	55.2643	58.2745	55.3931			94.0047	27.0008	19.5031	20.0359	31.4649	22.5367	24.5385	14.4677	26.2567	13.8151
	95.3871	59.1661	58.0445	57.4899	61.5702	56.762	62.9157	53.1732	58.7776	56.2022			95.3871	27.3543	19.5062	19.9502	31.8966	22.8121	24.5748	14.4376	25.9687	13.9316
	96.7695	58.8699	58.7377	59.0714	61.4388	56.3009	63.549	53.9263	60.4255	57.7173			96.7695	27.8315	19.6988	20.0536	32.4758	23.1871	24.5937	14.8039	26.4498	13.6574
	98.152	57.838	58.887	59.3847	60.7913	54.8848	64.233	53.5411	60.7803	57.989			98.152	28.5346	19.7377	20.4909	33.3509	23.7182	24.5978	14.8775	27.1439	13.8378
	99.5344	57.8149	57.5463	58.3417	60.7935	54.8363	62.315	52.7776	59.726	56.9573			99.5344	28.8377	19.6099	20.929	33.2695	24.4059	24.4554	14.7644	26.8905	14.9675
	100.917	57.8951	59.0951	58.5483	60.6409	55.1493	64.6069	53.5832	59.9108	57.1857			100.917	28.6992	19.8383	21.4424	33.1521	24.2463	24.6931	14.9834	27.4216	15.4632
	102.299	58.9891	57.3673	57.2933	61.7089	56.2692	61.7858	52.9488	58.6161	55.9705			102.299	28.8707	19.758	21.5915	33.6693	24.072	24.5474	14.9686	27.5031	15.6799
	103.682	58.72	58.8543	57.9732	61.3228	56.1173	63.0393	54.6694	59.345	56.6013			103.682	29.3445	19.9765	21.9078	34.0291	24.66	24.9009	15.0522	27.9992	15.8164
	105.064	58.5183	57.7568	59.7363	61.1065	55.93	61.8413	53.6723	61.2114	58.2613			105.064	29.6404	20.4395	22.6272	33.9655	25.3152	25.5045	15.3745	28.885	16.3694
	106.447	59.0482	57.9241	58.9282	61.5121	56.5843	61.755	54.0932	60.4274	57.4289			106.447	29.6726	20.4203	23.5073	33.9104	25.4348	25.3326	15.5081	29.8526	17.1621
	107.829	58.5803	58.9679	57.9911	60.8766	56.284	63.379	54.5568	59.5443	56.4379			107.829	29.4289	19.8765	24.3134	33.9449	24.9129	24.688	15.0651	30.9472	17.6797
	109.211	58.2161	57.4339	58.9192	60.4181	56.0141	62.0086	52.8593	60.4012	57.4373			109.211	28.8244	20.5815	24.7976	33.6457	24.003	25.271	15.8919	31.7383	17.8568
	110.594	58.6409	59.1636	59.1573	60.6224	56.6594	63.5173	54.8099	60.5519	57.7626			110.594	28.5639	21.3049	25.1177	33.1602	23.9675	26.1425	16.4674	31.5383	18.697
	111.976	59.1874	58.7537	59.1611	61.0456	57.3292	63.077	54.4303	60.5935	57.7287			111.976	28.7849	21.2364	25.4767	33.1595	24.4104	26.1239	16.3489	31.9989	18.9545
	113.359	59.7221	56.8877	57.8217	61.5706	57.8736	61.1779	52.5974	59.4138	56.2295			113.359	29.0006	21.0994	25.8835	33.1541	24.8471	25.8808	16.318	32.2982	19.4689
	114.741	60.2044	57.1951	57.6069	62.1129	58.2958	61.5832	52.8069	59.1742	56.0397			114.741	29.2882	21.3062	25.5358	33.4983	25.0781	26.0569	16.5554	32.0469	19.0246
	116.123	58.9788	58.6167	57.7083	60.6344	57.3231	63.5741	53.6593	59.4713	55.9453			116.123	29.343	21.3901	25.3251	33.2565	25.4295	26.2345	16.5457	32.1754	18.4749
	117.506	58.7392	59.021	57.6725	60.4198	57.0585	64.723	53.319	59.5991	55.7459			117.506	30.0108	21.1525	25.3049	33.885	26.1366	25.9011	16.4038	31.6741	18.9357
	118.888	58.5952	60.0963	58.0227	60.5438	56.6465	65.7085	54.4841	59.9279	56.1174			118.888	30.4979	20.5241	25.2515	34.1633	26.8325	25.1815	15.8667	31.7795	18.7236
	120.271	58.3077	58.0339	57.7964	60.5705	56.045	63.0142	53.0536	59.6329	55.9598			120.271	30.4859	20.0506	25.2507	33.8544	27.1175	24.7232	15.3781	32.1755	18.3259
	121.653	58.0727	57.0827	58.0215	60.492	55.6534	61.9031	52.2623	59.7864	56.2566			121.653	30.4466	20.4216	25.4748	33.5497	27.3435	25.2162	15.627	31.928	19.0215
	123.035	58.8801	58.5889	57.6065	61.2556	56.5046	64.6886	52.4892	59.1349	56.078			123.035	30.4511	20.4661	25.8698	33.221	27.6811	25.1922	15.7399	32.1726	19.567
	124.418	59.4661	56.808	57.1559	61.7679	57.1644	61.3369	52.2791	58.6554	55.6564			124.418	30.5599	20.5963	26.5967	33.588	27.5319	25.3017	15.8909	32.9767	20.2168
	125.8	59.2801	59.771	57.2116	61.2003	57.3599	64.6741	54.8679	58.781	55.6422			125.8	30.323	21.2994	27.3995	33.5669	27.079	25.9717	16.627	33.9523	20.8467
	127.183	60.07	58.6161	56.8011	61.6163	58.5238	62.9913	54.2408	58.563	55.0391			127.183	30.146	22.0685	28.0867	33.7331	26.5589	26.9774	17.1597	34.5687	21.6047
	128.565	59.4526	56.5765	57.3464	60.9171	57.9881	61.0932	52.0599	59.2957	55.397			128.565	30.4205	22.3821	28.1862	33.4121	27.429	27.395	17.3692	34.6868	21.6856
	129.948	59.2629	57.7414	56.888	60.7365	57.7894	62.3133	53.1694	58.7124	55.0636			129.948	30.7382	22.5339	28.0692	33.7832	27.6932	27.6274	17.4405	34.9389	21.1994
	131.33	60.184	60.4531	58.458	61.5708	58.7972	65.5859	55.3202	60.2114	56.7046			131.33	30.8723	22.9611	28.0862	34.4312	27.3134	28.0466	17.8757	34.493	21.6795
	132.713	59.8481	59.7704	58.3117	61.3534	58.3428	64.3937	55.147	60.1791	56.4443			132.713	31.133	23.1975	27.8958	34.1416	28.1244	28.2205	18.1746	34.4746	21.3169
	134.095	60.5905	60.2611	56.6793	62.3959	58.785	65.1334	55.3888	58.4176	54.941			134.095	31.6159	22.9809	27.8347	34.4747	28.7572	27.9225	18.0392	34.1832	21.4863
	135.477	60.0074	59.7673	57.1702	62.0245	57.9903	63.9395	55.595	58.8664	55.4741			135.477	32.1703	23	27.967	34.8072	29.5335	27.8755	18.1245	33.9924	21.9417
	136.86	60.3113	61.0006	56.8798	62.3092	58.3134	65.7646	56.2367	58.4748	55.2849			136.86	32.2046	22.6111	27.7945	34.6142	29.7949	27.4577	17.7645	33.8201	21.7688
	138.242	59.8464	60.3265	56.8477	61.7597	57.9331	65.0784	55.5747	58.3796	55.3158			138.242	31.9944	22.2414	27.7554	34.3939	29.5949	27.0509	17.4318	33.9954	21.5154
	139.625	60.2742	58.387	57.4678	62.1516	58.3968	63.3191	53.455	58.9395	55.996			139.625	31.7705	22.4124	27.6035	34.3877	29.1532	27.1956	17.6291	33.9566	21.2504
	141.007	59.6284	59.4698	58.0592	61.6142	57.6425	64.2272	54.7123	59.5318	56.5866			141.007	32.0588	22.4654	27.9562	34.8458	29.2718	27.381	17.5498	34.3345	21.578
	142.389	59.0576	60.5642	57.7843	60.9346	57.1806	65.4273	55.7011	59.3817	56.1869			142.389	32.3956	22.3192	28.0225	34.89	29.9013	27.2487	17.3896	34.1612	21.8838
	143.772	59.4932	59.2648	57.0272	61.2961	57.6902	63.8107	54.7189	58.5885	55.4659			143.772	32.4683	22.1198	27.8518	34.7061	30.2305	27.0181	17.2214	34.0158	21.6878
	145.154	59.4598	59.5383	57.2248	61.27	57.6496	64.6259	54.4507	58.8706	55.5789			145.154	32.7312	22.513	28.1925	34.6275	30.8349	27.687	17.339	34.5585	21.8265
	146.537	60.395	57.8957	56.7252	62.1693	58.6206	62.3564	53.4349	58.5965	54.8539			146.537	33.1538	22.9802	28.9607	35.4068	30.9008	28.1066	17.8539	35.1365	22.7849
	147.919	61.2681	60.4235	56.8822	62.9209	59.6152	65.4257	55.4212	58.7112	55.0533			147.919	33.2937	23.5469	29.3548	36.2465	30.3409	28.8547	18.2391	35.2415	23.4682
	149.302	61.515	58.9938	56.7101	63.2103	59.8197	63.3865	54.6012	58.5853	54.8349			149.302	33.995	23.971	29.5801	36.9234	31.0667	29.5605	18.3815	35.2743	23.8859
	150.684	62.1549	59.7438	55.8394	64.0191	60.2907	63.9402	55.5474	57.9506	53.7282			150.684	34.3618	23.8599	30.0193	36.7274	31.9962	29.3651	18.3547	35.7974	24.2411
	152.066	61.4675	60.9951	56.5307	63.4658	59.4693	65.4039	56.5862	58.8051	54.2563			152.066	34.1491	23.8796	30.0335	36.358	31.9403	28.9431	18.8162	35.9999	24.067
	153.449	61.144	61.8845	58.196	62.9468	59.3412	66.0878	57.6813	60.1272	56.2648			153.449	33.6854	23.6389	29.9607	35.7835	31.5873	28.6394	18.6384	35.9505	23.9709
	154.831	61.7212	61.2784	57.6894	63.3877	60.0546	65.9623	56.5945	59.5404	55.8385			154.831	33.539	24.1284	29.7845	35.7103	31.3678	29.522	18.7348	35.7333	23.8358
	156.214	62.8092	59.7222	56.4162	64.7155	60.9029	63.7966	55.6478	58.4152	54.4172			156.214	33.3785	24.1605	29.8344	35.6769	31.08	29.582	18.739	35.6271	24.0416
	157.596	62.2586	60.8796	56.1868	64.3689	60.1483	64.7426	57.0167	58.2274	54.1462			157.596	33.2899	24.2772	29.6003	35.3525	31.2273	29.5027	19.0516	35.3398	23.8608
	158.978	62.489	61.3494	56.6558	64.5495	60.4285	65.3328	57.3659	58.524	54.7875			158.978	33.5904	24.3839	29.4549	35.8761	31.3047	29.7816	18.9863	35.0789	23.8309
	160.361	62.7336	62.2648	56.2903	64.9578	60.5095	66.7592	57.7704	58.17	54.4106			160.361	33.8001	24.1346	30.001	36.27	31.3302	29.6185	18.6506	35.5848	24.4171
	161.743	62.5629	61.0889	55.9813	64.702	60.4238	64.64	57.5377	57.8474	54.1151			161.743	33.8302	24.5253	30.615	35.7537	31.9066	30.2718	18.7788	36.0094	25.2206
	163.126	62.9751	60.0013	56.9095	65.3243	60.626	63.5878	56.4147	58.6393	55.1796			163.126	34.4635	24.7772	30.6341	36.4591	32.4678	30.5897	18.9646	35.7919	25.4763
	164.508	63.5061	61.2889	56.7513	65.8559	61.1563	65.0072	57.5706	58.4353	55.0674			164.508	34.8671	24.4346	30.7311	37.4159	32.3183	29.9896	18.8795	36.1627	25.2995
	165.891	63.9676	60.8167	57.1748	66.1265	61.8087	64.3444	57.289	58.805	55.5446			165.891	35.0568	24.3735	30.6495	37.7707	32.343	29.5031	19.2438	36.3556	24.9434
	167.273	64.4503	61.9654	56.5472	66.55	62.3505	66.6299	57.301	58.2954	54.799			167.273	34.7831	24.4123	30.3021	37.1394	32.4267	29.5739	19.2508	35.9981	24.606
	168.655	63.6389	63.7377	56.9083	65.7129	61.5649	67.9998	59.4755	58.7353	55.0814			168.655	34.5147	24.6494	29.9426	36.8192	32.2102	29.8645	19.4343	35.9657	23.9196
	170.038	63.9835	64.5086	56.4505	65.7296	62.2375	68.419	60.5982	58.3119	54.589			170.038	34.5398	24.9772	30.2038	36.7743	32.3052	29.9536	20.0008	35.7688	24.6388
	171.42	64.7046	63.2784	56.6128	66.6079	62.8012	67.5505	59.0063	58.5853	54.6402			171.42	34.9981	25.5654	30.3162	37.7566	32.2396	30.1666	20.9643	35.4666	25.1659
	172.803	65.2361	62.8728	56.6777	67.3209	63.1513	67.3988	58.3469	58.6723	54.6831			172.803	35.3763	25.5982	30.2574	38.0496	32.7031	29.9546	21.2418	35.6672	24.8475
	174.185	64.7122	61.2642	56.2569	66.8339	62.5905	65.0398	57.4886	58.1593	54.3544			174.185	35.2878	25.779	30.2528	38.0023	32.5733	30.0824	21.4756	35.4072	25.0984
	175.568	64.7168	63.6278	56.9029	66.84	62.5937	67.524	59.7315	58.8613	54.9445			175.568	34.9859	25.8123	30.4349	37.487	32.4849	29.7848	21.8398	35.8004	25.0694
	176.95	63.7266	66.8371	57.1102	65.7731	61.68	71.5371	62.137	59.0586	55.1617			176.95	35.1889	26.187	30.7762	37.6596	32.7183	30.0092	22.3649	36.3357	25.2168
	178.332	64.642	63.4833	56.6754	66.6034	62.6807	67.1561	59.8105	58.6238	54.7269			178.332	36.0371	26.4444	30.7475	38.1815	33.8928	30.4462	22.4427	35.7581	25.737
	179.715	65.6921	63.9327	55.317	67.6447	63.7394	67.3997	60.4658	57.3488	53.2853			179.715	36.5878	26.4074	30.8471	38.6956	34.4801	30.5936	22.2212	35.8296	25.8646
	181.097	65.6059	64.858	55.4642	67.5143	63.6976	68.8715	60.8446	57.5911	53.3372			181.097	36.2275	25.6667	30.7283	38.773	33.682	29.8056	21.5277	35.4053	26.0513
	182.48	66.0863	64.5685	55.8423	68.0924	64.0802	68.044	61.0931	57.8314	53.8532			182.48	36.0755	25.0407	30.2784	38.5625	33.5886	29.6389	20.4426	34.5869	25.9699
	183.862	66.6146	64.9518	56.6175	68.544	64.6853	68.8548	61.0489	58.5884	54.6467			183.862	36.3928	25.021	30.5262	38.9324	33.8532	29.773	20.2689	35.8105	25.2418
	185.244	67.1682	64.0408	56.8629	69.0523	65.2842	68.6914	59.3901	58.8515	54.8743			185.244	36.5987	24.9803	30.6771	39.2986	33.8989	29.8701	20.0904	35.8626	25.4916
	186.627	67.4363	63.8809	57.2057	69.3068	65.5658	67.8479	59.9138	59.3403	55.071			186.627	36.6688	25.342	31.3511	38.93	34.4076	30.3032	20.3807	35.8678	26.8343
	188.009	66.7941	64.3117	56.2309	68.8691	64.7192	68.4835	60.1399	58.442	54.0197			188.009	37.2383	25.6506	32.2486	39.0216	35.455	30.6646	20.6366	36.6864	27.8108
	189.392	66.37	64.6043	55.8055	68.6714	64.0685	69.1054	60.1032	57.9508	53.6602			189.392	37.6706	25.8642	32.4785	39.3033	36.0378	31.0097	20.7187	36.4718	28.4852
	190.774	66.387	65.6926	56.4444	68.8229	63.9512	69.5365	61.8486	58.4933	54.3955			190.774	37.7756	26.1303	32.3273	39.9545	35.5967	31.4458	20.8147	36.3887	28.2659
	192.157	67.0465	64.7327	57.0099	69.5832	64.5098	69.4547	60.0107	59.1672	54.8526			192.157	37.8572	26.6025	32.6249	40.2527	35.4616	32.0401	21.1649	37.0588	28.1911
	193.539	66.8122	65.3685	57.1986	69.4674	64.1571	71.1168	59.6203	59.4968	54.9004			193.539	38.0478	26.4889	32.6466	39.7237	36.3718	32.0478	20.93	36.8657	28.4276
	194.922	65.6097	64.9722	56.4883	68.3903	62.8292	70.004	59.9404	58.9373	54.0393			194.922	37.7888	26.2191	32.7431	39.7424	35.8352	31.3003	21.1379	36.8979	28.5883
	196.304	65.2998	66.5265	55.9208	67.9713	62.6283	70.8893	62.1638	58.4334	53.4082			196.304	36.9767	26.3309	33.1359	39.2771	34.6763	31.6318	21.0299	37.8559	28.4159
	197.686	66.1993	65.5358	57.012	68.6731	63.7254	70.3796	60.692	59.4863	54.5378			197.686	36.772	26.3543	33.5758	39.3096	34.2344	31.4738	21.2349	38.626	28.5255
	199.069	67.5261	64.4691	57.4938	69.6613	65.3908	69.1067	59.8315	59.8405	55.1471			199.069	36.6496	26.329	34.0156	38.8825	34.4168	31.2923	21.3657	38.6172	29.414
	200.451	67.1111	63.8111	56.2803	69.1536	65.0686	68.5108	59.1115	58.5925	53.968			200.451	36.5422	26.5105	34.5772	38.4724	34.6121	31.4215	21.5994	38.7579	30.3965
	201.834	66.6803	65.1889	57.1897	68.6951	64.6655	69.7965	60.5813	59.4514	54.9279			201.834	36.7765	26.8234	34.6422	38.5704	34.9827	31.464	22.1829	39.1552	30.1293
	203.216	67.0942	66.4111	56.7894	69.1888	64.9996	70.7313	62.0909	59.0831	54.4958			203.216	37.2531	26.4426	34.7728	39.5966	34.9095	30.9812	21.904	39.2863	30.2594
	204.598	66.6538	67.613	57.0366	68.9656	64.342	71.7464	63.4795	59.4735	54.5997			204.598	37.9742	26.5734	35.4878	40.8569	35.0914	31.0855	22.0614	39.8996	31.076
	205.981	66.4728	68.6802	57.4864	69.1262	63.8195	73.0222	64.3382	60.101	54.8718			205.981	39.2806	27.521	36.1565	42.1067	36.4544	32.5126	22.5294	40.2624	32.0507
	207.363	67.9949	68.8062	57.3722	70.7747	65.2151	73.4069	64.2055	59.9136	54.8307			207.363	39.9533	28.4296	36.2193	42.2352	37.6715	33.6577	23.2016	40.0925	32.3461
	208.746	68.7036	68.5234	57.4686	71.4244	65.9827	73.2639	63.783	60.0542	54.8829			208.746	39.6708	28.6303	36.5569	42.0219	37.3197	33.9244	23.3361	40.9253	32.1885
	210.128	67.2323	68.7475	56.8245	70.0251	64.4396	73.6032	63.8919	59.4207	54.2283			210.128	39.5031	28.7376	36.3159	41.4253	37.5809	34.0405	23.4348	40.4804	32.1514
	211.511	66.7935	69.421	57.8636	69.7813	63.8056	74.4832	64.3588	60.6087	55.1185			211.511	39.6816	28.9049	35.9687	42.046	37.3171	34.299	23.5109	40.2534	31.6839
	212.893	68.414	68.7969	59.2211	71.5137	65.3144	74.0232	63.5706	62.092	56.3502			212.893	39.834	28.4586	35.4336	42.34	37.3281	34.1561	22.7611	39.8379	31.0293
	214.275	69.2154	68.766	58.3887	72.3201	66.1108	73.7812	63.7509	61.1563	55.6211			214.275	39.6621	29.0161	34.7262	41.7985	37.5258	34.9191	23.1131	39.1294	30.323
	215.658	68.6557	70.8457	57.7529	71.6451	65.6663	76.2994	65.3919	60.3332	55.1727			215.658	39.0309	29.6543	33.96	42.0187	36.0432	35.4762	23.8324	38.6157	29.3043
	217.04	69.2994	69.8827	58.2412	72.1206	66.4782	75.0575	64.7079	60.7194	55.7631			217.04	38.9857	29.7938	33.5044	42.0386	35.9328	35.6105	23.9771	37.9756	29.0332
	218.423	70.211	69.8389	59.0161	72.9015	67.5204	74.5034	65.1743	61.3243	56.7079			218.423	39.0201	29.884	34.1695	41.4904	36.5498	35.539	24.2289	38.1104	30.2287
	219.805	69.1945	71.0969	57.8443	71.8536	66.5354	76.5497	65.6441	59.9795	55.7091			219.805	38.9589	29.4531	34.6871	41.4563	36.4615	34.9813	23.9249	38.5366	30.8376
	221.188	69.0431	72.5142	56.9921	71.6559	66.4303	77.7669	67.2615	58.9171	55.0672			221.188	38.8537	29.3642	35.1088	41.0802	36.6272	34.6971	24.0313	39.2116	31.0059
	222.57	70.0243	71.513	57.1503	72.6102	67.4383	77.4072	65.6187	59.1981	55.1026			222.57	38.937	29.3068	35.2019	41.4428	36.4313	34.6789	23.9347	38.8686	31.5353
	223.952	70.46	70.4685	58.0433	72.9849	67.9351	75.769	65.1681	60.3398	55.7467			223.952	38.9558	29.3086	35.4585	41.6153	36.2963	34.6948	23.9225	38.762	32.1551
	225.335	69.9287	70.7463	58.5937	72.4942	67.3632	76.0558	65.4367	60.8802	56.3071			225.335	38.6884	29.4704	35.2965	41.975	35.4018	34.7283	24.2125	38.7616	31.8315
	226.717	70.7161	71.1296	58.1392	73.4286	68.0036	75.5745	66.6848	60.2961	55.9823			226.717	38.4301	28.8883	35.0474	42.0155	34.8448	33.7415	24.035	38.675	31.4198
	228.1	71.1184	72.5154	57.839	73.8834	68.3535	77.2741	67.7568	59.8656	55.8124			228.1	38.1525	28.4753	35.29	41.1274	35.1777	32.7833	24.1673	38.9201	31.6599
	229.482	70.7045	72.7518	58.8684	73.304	68.1049	77.1004	68.4032	60.8632	56.8737			229.482	38.4484	28.5284	35.0101	41.3309	35.5658	32.526	24.5308	38.3733	31.6469
	230.864	71.1768	73.2377	59.4733	73.5962	68.7575	77.6918	68.7835	61.7201	57.2264			230.864	38.9891	29.2093	34.395	42.0458	35.9324	32.542	25.8765	37.3815	31.4084
	232.247	71.4049	75.208	58.3503	73.8656	68.9441	80.0739	70.3422	60.9405	55.7601			232.247	39.33	29.9105	34.5569	42.2368	36.4231	33.0998	26.7212	37.8705	31.2434
	233.629	70.9655	73.129	58.8388	73.3665	68.5644	77.3592	68.8988	61.6839	55.9937			233.629	39.0719	30.6086	35.0048	41.6253	36.5184	33.6998	27.5174	37.9942	32.0154
	235.012	70.8027	70.8235	58.488	73.2637	68.3417	75.5417	66.1052	61.4648	55.5113			235.012	39.2427	31.0494	35.4658	41.9089	36.5765	33.7312	28.3676	38.3604	32.5713
	236.394	70.9496	71.3926	59.1032	73.3634	68.5359	76.2576	66.5276	62.0672	56.1393			236.394	39.8526	30.7543	35.8828	42.6493	37.0559	33.4929	28.0158	39.3709	32.3947
	237.777	71.9639	73.5932	60.2455	74.1487	69.7792	78.6122	68.5742	63.0871	57.404			237.777	39.9879	30.9957	36.1946	42.6363	37.3394	33.8993	28.092	40.445	31.9442
	239.159	71.6952	74.4265	58.9944	73.8321	69.5582	79.6053	69.2478	61.6481	56.3408			239.159	39.9413	30.4537	36.5759	42.6764	37.2062	33.6083	27.299	40.1594	32.9925
	240.541	71.7764	75.558	59.6379	73.8813	69.6715	80.7596	70.3564	62.4671	56.8088			240.541	39.9745	29.6111	37.439	42.2751	37.6739	33.1158	26.1064	40.9848	33.8933
	241.924	73.0526	75.8512	60.6315	75.3247	70.7805	81.5385	70.164	63.6436	57.6194			241.924	40.2997	29.3339	37.752	42.2313	38.368	33.3072	25.3606	41.4602	34.0438
	243.306	73.0627	73.8809	60.0476	75.4742	70.6513	79.2118	68.5499	62.8551	57.2401			243.306	40.1715	29.4809	38.0231	41.8286	38.5144	33.6269	25.3348	41.922	34.1242
	244.689	72.9229	75.6994	60.1949	75.3702	70.4756	81.8886	69.5101	62.6778	57.7121			244.689	39.9089	28.9845	38.0122	41.6374	38.1804	32.9451	25.024	42.3588	33.6655
	246.071	72.7123	76.5055	60.2659	75.0046	70.4199	82.2332	70.7779	62.6385	57.8934			246.071	39.8089	28.8247	37.8225	41.7597	37.8582	32.5652	25.0842	41.9256	33.7194
	247.453	73.2948	75.9642	60.5106	75.5233	71.0662	81.5895	70.3389	62.7876	58.2336			247.453	39.6639	29.521	37.7757	42.2185	37.1094	33.2229	25.8191	41.6198	33.9316
	248.836	73.7476	75.4488	59.3607	75.8314	71.6639	81.4773	69.4203	61.5225	57.1988			248.836	39.3258	29.8827	37.6589	42.1649	36.4868	33.5562	26.2092	41.337	33.9808
	250.218	71.9329	74.7414	59.9775	74.0485	69.8173	80.8914	68.5913	62.2807	57.6743			250.218	39.1088	30.1537	37.5321	41.607	36.6106	33.4322	26.8752	41.5542	33.5099
	251.601	73.215	76.2049	60.665	75.4283	71.0016	81.932	70.4779	63.0949	58.2351			251.601	38.884	30.8574	37.3261	40.8419	36.9261	34.1241	27.5907	41.3761	33.276
	252.983	74.5879	76.9975	60.9404	76.7108	72.4651	83.7039	70.2912	63.3802	58.5007			252.983	38.5355	31.0303	36.7966	40.6131	36.4578	34.5394	27.5211	40.694	32.8991
	254.366	73.8305	80.237	61.0484	75.8516	71.8094	87.234	73.2401	63.2012	58.8957			254.366	38.1006	31.5753	35.9105	40.161	36.0402	35.1017	28.0489	39.5347	32.2863
	255.748	74.5439	80.1117	59.7341	76.7216	72.3662	87.5506	72.6728	61.9162	57.552			255.748	38.1401	31.0284	35.755	40.6244	35.6558	34.8195	27.2372	39.3989	32.1111
	257.13	75.0838	80.4241	59.7173	77.2757	72.8918	87.0554	73.7927	61.9716	57.4631			257.13	38.6111	31.0284	35.7859	41.2866	35.9355	35.0477	27.0091	39.4093	32.1624
	258.513	74.3057	81.6056	60.7225	76.6318	71.9796	89.4366	73.7745	63.0225	58.4225			258.513	39.6328	31.7432	35.8569	42.4217	36.8438	35.8966	27.5898	39.2481	32.4656
	259.895	74.9228	82.6216	60.063	77.4246	72.421	90.6349	74.6082	62.4903	57.6358			259.895	40.133	31.4809	35.9896	42.7637	37.5023	35.2459	27.7158	38.9847	32.9944
	261.278	75.523	81.687	60.1634	78.1316	72.9145	89.5444	73.8297	62.9775	57.3493			261.278	40.3695	31.7284	36.2509	43.0384	37.7005	35.4316	28.0252	38.8304	33.6713
	262.66	76.1571	83.2451	59.8732	78.7512	73.5629	90.8689	75.6213	62.8174	56.929			262.66	40.5374	32.8685	36.4942	43.1887	37.886	36.6113	29.1257	38.8703	34.1182
	264.043	76.9632	86.1173	59.6848	79.4819	74.4446	93.5942	78.6404	62.4288	56.9407			264.043	40.6377	34.2438	36.4598	43.7012	37.5742	38.3051	30.1826	38.936	33.9836
	265.425	77.4484	85.4123	59.575	79.9107	74.9861	93.3059	77.5188	62.3784	56.7716			265.425	40.5921	33.7414	35.9742	43.3512	37.833	38.201	29.2818	38.8496	33.0987
	266.807	77.2656	85.9469	59.5755	79.8424	74.6888	93.5731	78.3208	62.6635	56.4875			266.807	40.5372	33.2006	35.8343	42.832	38.2424	37.7847	28.6165	39.0936	32.5749
	268.19	76.1597	86.7666	58.7576	78.7229	73.5965	94.6949	78.8384	61.9944	55.5209			268.19	41.0726	32.3117	35.7124	43.5361	38.6092	36.9105	27.713	39.1097	32.3151
	269.572	77.7817	86.9506	58.2258	80.3925	75.1709	95.4619	78.4394	61.3714	55.0803			269.572	41.9533	32.2111	35.64	44.2647	39.6418	36.9506	27.4717	38.4519	32.8282
	270.955	78.1591	85.1969	58.8636	80.94	75.3781	93.5314	76.8624	62.0224	55.7048			270.955	42.4182	32.3222	35.3202	44.6923	40.1442	37.1639	27.4805	37.8465	32.794
	272.337	76.5709	82.9463	58.5282	79.6435	73.4983	91.9178	73.9748	61.6104	55.4461			272.337	42.6355	31.6599	34.9164	44.5895	40.6814	36.5815	26.7382	37.3571	32.4757
	273.719	76.451	84.1043	58.3195	79.6955	73.2065	92.4262	75.7825	61.1835	55.4554			273.719	42.7926	31.479	35.0791	44.5439	41.0414	36.7977	26.1603	37.7153	32.443
	275.102	76.9906	84.8154	59.0621	80.2692	73.712	94.1209	75.51	62.0101	56.1142			275.102	42.6826	31.1537	35.6202	44.7289	40.6364	36.3072	26.0002	38.5145	32.7259
	276.484	78.308	81.1543	59.8566	81.6948	74.9212	90.7813	71.5274	63.0065	56.7066			276.484	42.7995	31.3667	35.9547	44.9192	40.6797	36.5675	26.1658	39.1064	32.803
	277.867	78.1931	82.255	59.1119	81.5249	74.8613	92.028	72.4819	62.2563	55.9674			277.867	42.9681	31.3994	36.3094	45.2044	40.7317	36.7611	26.0377	39.3147	33.3042
	279.249	78.5681	82.5154	59.9331	81.8269	75.3093	91.63	73.4009	63.2943	56.572			279.249	43.0953	31.8568	36.6134	45.499	40.6915	37.3737	26.3399	39.8018	33.425
	280.632	81.0646	80.6525	61.4918	84.3066	77.8226	89.8461	71.4588	65.0723	57.9112			280.632	42.9872	32.3451	36.825	45.1808	40.7936	37.8878	26.8024	39.6908	33.9593
	282.014	81.7082	80.6197	61.0636	84.9877	78.4286	90.1465	71.093	64.7328	57.3945			282.014	42.2054	32.2426	36.7529	44.4948	39.9161	37.4475	27.0377	39.5646	33.9413
	283.397	80.6229	82.1821	60.8372	84.157	77.0889	91.51	72.8542	64.483	57.1913			283.397	41.7495	32.3642	36.7362	44.3093	39.1898	37.6074	27.121	39.7346	33.7377
	284.779	79.7444	82.9945	60.8082	83.301	76.1878	91.9551	74.0339	64.4994	57.1171			284.779	41.5927	31.6229	37.1482	43.847	39.3383	36.4085	26.8372	40.3208	33.9755
	286.161	80.1414	81.1932	60.1855	83.5395	76.7433	89.6748	72.7116	63.9221	56.449			286.161	41.4109	31.2339	37.5227	43.7377	39.0842	35.4212	27.0466	40.5975	34.448
	287.544	82.505	80.5901	59.831	86.0635	78.9466	89.7649	71.4153	63.6294	56.0326			287.544	41.5258	31.2778	37.8873	43.7537	39.298	34.2271	28.3284	40.4641	35.3105
	288.926	82.3039	81.8006	59.9665	85.8241	78.7837	90.0032	73.5981	63.6069	56.3261			288.926	41.7632	31.7543	38.2297	43.5994	39.9269	33.88	29.6287	40.5948	35.8645
	290.309	81.3372	79.9253	60.0288	84.8355	77.839	86.7662	73.0845	63.404	56.6535			290.309	42.0949	32.571	38.4651	43.9585	40.2314	34.6509	30.4911	40.8099	36.1203
	291.691	82.1289	79.2451	61.1544	86.0314	78.2263	87.029	71.4611	64.2762	58.0327			291.691	42.6813	32.9623	39.1579	44.2976	41.0649	35.3217	30.603	41.297	37.0187
	293.073	82.8762	80.6253	62.1704	86.6594	79.093	88.4306	72.82	64.9938	59.347			293.073	42.7058	32.1037	39.2211	44.5258	40.8858	34.8848	29.3226	41.5247	36.9175
	294.456	82.3028	83.3753	61.5505	85.9367	78.6689	91.1326	75.618	64.3929	58.7081			294.456	42.8655	31.2389	38.4423	44.9842	40.7468	34.5257	27.9521	41.4603	35.4242
	295.838	82.0677	81.9574	62.6111	85.656	78.4793	89.7538	74.161	65.4838	59.7384			295.838	43.5632	30.1124	38.4587	45.8416	41.2849	33.923	26.3017	41.8359	35.0814
	297.221	83.2035	79.366	63.9401	86.6778	79.7292	87.2346	71.4975	66.8834	60.9968			297.221	44.4499	29.5938	38.547	46.384	42.5158	33.9715	25.2162	41.1702	35.9238
	298.603	84.7322	78.3759	63.567	87.9707	81.4937	85.421	71.3309	66.5457	60.5882			298.603	44.7781	29.5376	38.0864	46.6935	42.8628	34.0785	24.9968	40.6815	35.4912
	299.986	84.0622	80.1673	62.7261	87.1696	80.9549	86.5388	73.7957	65.7404	59.7118			299.986	44.5732	29.5006	37.7167	46.6854	42.4609	34.1805	24.8207	40.9473	34.4862
	301.368	83.7282	81.821	62.6556	86.997	80.4594	88.5599	75.0821	65.6271	59.6841			301.368	45.0892	29.4166	38.343	47.4273	42.7511	33.8502	24.9831	41.3314	35.3545
	302.75	85.3579	79.3265	62.7347	88.3847	82.3311	86.1401	72.513	65.5287	59.9407			302.75	45.8136	29.3895	38.7783	48.3572	43.27	33.9224	24.8566	41.7012	35.8553
	304.133	85.9851	82.1661	62.3494	88.6965	83.2736	89.4918	74.8403	65.0615	59.6372			304.133	45.7667	29.642	39.2549	48.4834	43.05	33.8051	25.4788	41.2547	37.255
	305.515	85.0518	81.2624	62.5328	87.8421	82.2615	88.9761	73.5486	65.2176	59.8481			305.515	45.8967	30.521	39.2291	48.2914	43.5019	34.7277	26.3143	41.2626	37.1955
	306.898	83.9389	79.3957	63.2473	86.9291	80.9488	86.3292	72.4621	66.1276	60.367			306.898	45.4646	31.2389	38.8574	48.3229	42.6064	35.4215	27.0563	41.5045	36.2104
	308.28	84.5495	81.7549	61.9109	87.8258	81.2732	89.9188	73.5911	64.8654	58.9563			308.28	44.431	31.1802	38.5101	47.8718	40.9902	35.4529	26.9076	40.957	36.0632
	309.663	85.7915	81.4876	62.6631	89.5507	82.0324	88.8779	74.0974	65.7378	59.5884			309.663	44.1322	31.2519	38.1397	47.2179	41.0464	35.2815	27.2222	40.5299	35.7496
	311.045	86.1751	79.4407	62.5209	89.9755	82.3747	87.1244	71.7571	65.714	59.3279			311.045	44.5661	30.8488	37.3993	47.3491	41.7831	34.827	26.8705	40.1568	34.6418
	312.427	85.7652	79.9327	62.7542	89.5987	81.9318	88.007	71.8585	65.7279	59.7806			312.427	44.7703	30.4315	36.0596	47.4312	42.1094	34.5047	26.3582	38.6054	33.5138
	313.81	85.5671	82.8716	63.1941	89.1991	81.935	92.4286	73.3146	66.0197	60.3684			313.81	43.8138	30.7031	35.7349	46.6046	41.023	34.8363	26.5698	38.4255	33.0442
	315.192	85.8704	83.6296	63.0857	89.3705	82.3704	91.7347	75.5246	65.8737	60.2977			315.192	42.8731	30.4358	36.036	46.102	39.6441	34.7937	26.0779	38.3084	33.7635
	316.575	86.4296	82.8617	63.9953	89.8797	82.9795	89.8956	75.8279	66.6146	61.376			316.575	42.2948	30.3809	36.8628	45.6798	38.9097	34.6284	26.1334	38.7289	34.9967
	317.957	87.1462	82.6142	65.9843	90.5295	83.7629	89.5823	75.6461	68.4773	63.4912			317.957	42.3959	29.8413	37.8254	44.4995	40.2923	34.1251	25.5575	40.1536	35.4972
	319.339	85.9865	82.3389	64.9864	89.2169	82.7561	89.3101	75.3676	67.3502	62.6227			319.339	42.6846	29.9488	38.7959	44.4901	40.879	34.3264	25.5712	40.7536	36.8383
	320.722	86.1792	81.8685	64.8528	89.2238	83.1346	89.2059	74.5311	67.0773	62.6282			320.722	42.0181	30.5765	38.6651	44.444	39.5922	35.1029	26.0502	40.4879	36.8422
	322.104	88.832	81.3914	64.8334	92.0662	85.5978	89.3861	73.3967	67.0512	62.6156			322.104	42.1849	30.6111	38.2814	44.6246	39.7452	34.6428	26.5794	40.3968	36.1659
	323.487	89.1045	81.8543	64.0028	92.5769	85.6321	89.5681	74.1406	66.4706	61.5351			323.487	42.4302	31.6698	38.6414	44.7694	40.091	35.1762	28.1633	40.611	36.6718
	324.869	87.2281	80.2124	64.4279	90.6965	83.7596	88.5716	71.8531	67.1312	61.7245			324.869	42.4595	32.6346	38.9264	44.6408	40.2781	35.9443	29.3249	41.1691	36.6838
	326.252	86.7247	82.0333	64.5213	90.0326	83.4167	90.1741	73.8925	67.4435	61.5991			326.252	42.7955	32.8056	38.9741	45.3862	40.2047	36.6516	28.9595	41.2733	36.675
	327.634	86.658	84.6154	65.8011	90.0912	83.2247	91.906	77.3248	69.0034	62.5988			327.634	43.2992	32.9556	38.9317	46.0439	40.5545	36.7816	29.1295	41.3166	36.5468
	329.016	85.8153	86.9679	64.7234	89.3108	82.3199	93.9524	79.9834	67.9432	61.5036			329.016	43.7672	32.6198	38.7742	46.0337	41.5007	36.7536	28.4859	40.8443	36.7042
	330.399	84.724	86.8611	63.7655	88.1672	81.2807	94.913	78.8092	67.0393	60.4916			330.399	43.8833	32.5981	38.5897	46.1962	41.5705	36.6036	28.5927	40.5798	36.5995
	331.781	85.7965	85.908	64.5134	89.2085	82.3845	93.0387	78.7774	67.9107	61.1162			331.781	44.0755	30.3796	38.5918	46.773	41.378	34.2564	26.5029	41.1689	36.0147
	333.164	86.7686	84.1988	64.5296	90.5169	83.0204	90.478	77.9195	67.7018	61.3575			333.164	44.9272	28.9204	38.1454	47.6035	42.2509	32.879	24.9618	40.8707	35.4201
	334.546	86.7395	81.9957	63.5914	90.6679	82.811	88.1977	75.7937	66.4081	60.7747			334.546	44.9713	28.7278	38.1104	48.48	41.4626	32.7668	24.6887	40.5614	35.6595
	335.928	86.1059	82.371	63.2782	90.1239	82.0879	87.8611	76.8809	65.9427	60.6138			335.928	43.8256	28.9944	38.9644	47.8548	39.7964	33.4047	24.5842	41.2831	36.6458
	337.311	85.0171	83.4364	63.7303	89.0634	80.9708	90.1991	76.6737	66.4905	60.9702			337.311	43.23	28.729	39.8667	47.1838	39.2762	33.0904	24.3676	42.7596	36.9739
	338.693	85.7202	83.4531	63.4233	89.8576	81.5827	89.1389	77.7673	65.9829	60.8637			338.693	43.2935	28.463	40.6868	47.2959	39.2912	32.7369	24.1891	44.0539	37.3197
	340.076	86.1172	82.2543	63.6041	90.1821	82.0523	88.18	76.3286	65.9049	61.3034			340.076	42.6526	29.2185	40.3004	46.9522	38.353	33.1661	25.271	43.8566	36.7442
	341.458	85.6352	83.2451	63.8621	89.534	81.7364	90.4599	76.0303	66.1467	61.5774			341.458	42.3242	30.5636	39.4592	46.8347	37.8138	34.2976	26.8296	42.6726	36.2458
	342.841	85.1118	83.5031	63.0128	88.9046	81.3191	90.5603	76.4459	65.3467	60.6789			342.841	42.481	31.4123	38.7922	47.0937	37.8682	34.4524	28.3723	41.7191	35.8654
	344.223	85.3704	83.6623	61.8438	88.9273	81.8134	90.4831	76.8416	64.254	59.4336			344.223	42.1328	31.0216	38.2119	46.621	37.6446	33.7999	28.2433	41.5057	34.9182
	345.606	85.8701	83.6568	61.756	89.3897	82.3505	90.5391	76.7745	64.2768	59.2352			345.606	41.9168	31.5877	38.0693	46.429	37.4045	34.5894	28.5859	41.7765	34.3622
	346.988	85.8923	81.3247	62.4904	89.183	82.6016	88.4429	74.2065	65.2998	59.6809			346.988	41.5412	32.3216	37.6456	46.1139	36.9684	35.9758	28.6674	41.8207	33.4705
	348.37	85.9578	82.8191	61.975	89.0607	82.855	90.4298	75.2085	64.9338	59.0161			348.37	41.346	32.8463	37.3254	46.4731	36.2189	37.3594	28.3332	41.3177	33.3331
	349.753	86.042	80.9957	62.2261	88.9401	83.1439	88.3829	73.6084	65.1791	59.273			349.753	41.4208	32.6988	37.0628	46.5234	36.3182	37.8537	27.5438	40.8557	33.2699
	351.135	86.0314	80.5117	62.3392	88.7652	83.2977	87.9796	73.0439	65.2468	59.4317			351.135	42.3372	32.0679	37.1152	47.9935	36.6808	37.4665	26.6693	40.7856	33.4448
	352.518	84.9602	80.5488	62.0649	87.7878	82.1327	88.724	72.3735	65.1723	58.9576			352.518	42.9779	31.7531	36.9783	48.3145	37.6412	37.5425	25.9637	40.2379	33.7187
	353.9	86.939	79.7148	61.6069	89.7084	84.1697	87.8554	71.5743	65.0079	58.2059			353.9	43.5063	31.4136	36.6723	48.6121	38.4006	37.1434	25.6837	40.1314	33.2133
	355.282	87.1157	81.0753	62.0077	89.7106	84.5207	87.4757	74.6749	65.4214	58.594			355.282	44.007	30.5648	36.8723	49.0266	38.9873	35.7954	25.3343	40.8943	32.8504
	356.665	87.5019	80.6426	62.564	90.1161	84.8878	87.2813	74.0039	65.8638	59.2642			356.665	44.2713	28.921	36.6324	49.5339	39.0088	33.5699	24.2721	40.5531	32.7118
	358.047	87.4171	77.9876	62.2018	90.1026	84.7317	83.3251	72.6502	65.3939	59.0097			358.047	44.6057	27.1389	36.1669	49.9588	39.2527	31.4796	22.7982	39.5732	32.7606
	359.43	84.9693	77.4926	61.6532	87.7864	82.1522	83.695	71.2901	64.8423	58.464			359.43	45.5252	26.8111	35.9229	50.9397	40.1106	31.4066	22.2157	39.8257	32.0201
	360.812	84.7505	77.7142	62.2212	87.9096	81.5914	84.1118	71.3166	65.3275	59.1149			360.812	46.7655	27.8438	35.8667	52.5189	41.0122	32.6885	22.9991	40.4937	31.2397
	362.195	86.9025	77.8148	62.0844	90.5397	83.2653	84.3333	71.2963	65.1043	59.0646			362.195	47.1359	28.8975	36.5095	52.5037	41.768	34.07	23.725	40.7108	32.3083
	363.577	87.1183	77.058	61.2504	90.9354	83.3012	82.57	71.546	64.2754	58.2255			363.577	46.583	28.5154	37.1278	51.4503	41.7157	33.4768	23.554	41.3678	32.8878
	364.959	87.1931	76.8667	61.8693	90.8545	83.5317	82.8071	70.9263	64.8659	58.8727			364.959	45.8267	28.4673	36.616	51.2177	40.4356	33.4365	23.498	41.2492	31.9829
	366.342	87.3994	75.7025	61.9637	90.802	83.9969	81.5836	69.8213	64.9837	58.9437			366.342	44.9949	28.4574	36.5832	50.5931	39.3968	33.4602	23.4546	41.22	31.9463
	367.724	85.4222	76.0247	61.2047	88.3493	82.4952	82.2232	69.8262	64.2635	58.146			367.724	44.0989	28.8136	36.874	49.0186	39.1792	33.7861	23.8411	41.4846	32.2634
	369.107	84.7688	76.9284	61.5512	87.0645	82.4732	83.9754	69.8813	64.3291	58.7733			369.107	43.0333	28.8173	36.6284	48.3815	37.6851	33.6558	23.9788	41.0433	32.2134
	370.489	85.1448	75.0722	61.6798	87.3854	82.9042	81.6388	68.5057	64.4743	58.8853			370.489	42.6596	28.7901	36.6516	48.3375	36.9817	33.9208	23.6594	41.272	32.0313
	371.872	85.4746	74.6315	62.2322	87.9891	82.9602	81.5509	67.712	65.3185	59.1459			371.872	42.9905	29.4006	37.3582	47.9171	38.0638	34.7233	24.0779	42.366	32.3504
	373.254	85.2778	74.021	62.7074	87.9053	82.6504	79.4883	68.5537	65.9379	59.4769			373.254	43.3693	30.213	38.3505	48.6278	38.1109	35.5111	24.9148	42.9943	33.7068
	374.636	84.8856	73.2136	62.8703	87.568	82.2033	78.4243	68.0028	66.4151	59.3254			374.636	43.6212	31.6167	38.999	49.2878	37.9546	36.7363	26.4971	43.3906	34.6075
	376.019	85.1354	74.6204	62.3108	88.0041	82.2667	79.9503	69.2904	66.0168	58.6049			376.019	43.4118	31.9543	39.401	48.7927	38.0308	36.8982	27.0104	43.8802	34.9219
	377.401	85.6724	73.6432	62.3771	88.7124	82.6324	78.7203	68.5661	66.0489	58.7054			377.401	42.7441	30.8593	39.5412	48.5908	36.8974	35.361	26.3576	44.2125	34.8698
	378.784	84.0058	71.379	63.5191	87.0728	80.9388	76.8517	65.9064	67.0445	59.9937			378.784	42.1823	29.85	39.4255	48.2675	36.0971	33.7651	25.9349	43.7487	35.1022
	380.166	83.6451	71.6556	63.1352	86.5956	80.6946	76.9325	66.3787	66.4177	59.8527			380.166	42.413	29.1265	39.2422	48.1333	36.6928	32.9524	25.3007	43.8369	34.6474
	381.548	83.1885	71.5821	62.3432	86.1519	80.2251	76.2803	66.8839	65.4774	59.209			381.548	42.7051	28.7926	39.2088	48.1747	37.2355	32.3687	25.2165	44.0897	34.3279
	382.931	82.355	70.5339	61.7489	85.3088	79.4013	75.9835	65.0844	64.9643	58.5334			382.931	42.1753	29.0315	39.113	47.2024	37.1482	32.245	25.8179	43.3571	34.869
	384.313	82.2006	70.5846	61.5622	85.0936	79.3075	76.0037	65.1654	64.9991	58.1254			384.313	41.3476	29.3012	39.1995	46.3471	36.3482	32.7612	25.8412	43.7872	34.6118
	385.696	82.5615	69.0882	61.9513	85.5311	79.5918	74.6842	63.4923	65.7464	58.1563			385.696	41.0961	28.9105	39.4173	46.5746	35.6177	32.0117	25.8093	44.1709	34.6636
	387.078	81.8174	72.6568	61.9166	84.716	78.9188	78.4362	66.8774	65.8051	58.0282			387.078	41.0716	29.2302	39.8792	46.17	35.9733	32.1001	26.3604	44.2578	35.5005
	388.461	81.5514	73.479	61.4843	84.2772	78.8256	79.294	67.664	65.3302	57.6385			388.461	40.6781	29.6327	40.7982	45.1374	36.2188	32.8023	26.4632	45.1959	36.4004
	389.843	81.9822	71.3827	61.9825	84.7173	79.2471	76.0073	66.7581	65.8411	58.1239			389.843	40.1464	30.3358	40.9641	44.8663	35.4266	34.208	26.4636	45.0029	36.9254
	391.225	81.4059	72.5062	62.549	84.4149	78.3968	77.2302	67.7822	66.2934	58.8046			391.225	40.4078	30.0617	41.4355	45.6322	35.1834	34.5823	25.5412	45.3164	37.5546
	392.608	81.9349	71.9648	62.9012	85.107	78.7629	76.4652	67.4644	66.475	59.3274			392.608	41.273	30.187	41.7639	46.7969	35.7492	34.9298	25.4443	45.9414	37.5864
	393.99	82.3651	70.9432	62.1757	85.3817	79.3486	75.8248	66.0616	65.4741	58.8772			393.99	41.6528	30.7272	41.067	46.9023	36.4033	35.7073	25.7471	45.4487	36.6853
	395.373	81.627	70.0982	61.0268	84.5035	78.7506	75.8406	64.3558	63.918	58.1357			395.373	41.4537	31.5259	40.2053	46.5952	36.3122	36.8089	26.243	44.3006	36.1099
	396.755	81.3677	69.5642	60.8165	84.0518	78.6836	74.79	64.3384	63.5486	58.0844			396.755	41.1517	31.6488	39.9072	45.835	36.4685	36.9852	26.3124	43.9587	35.8557
	398.137	81.0812	68.7648	60.1731	83.6929	78.4695	73.179	64.3507	62.8579	57.4883			398.137	41.4814	30.7951	39.7888	46.5111	36.4518	35.7184	25.8718	43.609	35.9687
	399.52	82.2806	69.6025	60.2675	84.918	79.6432	74.7939	64.411	62.8937	57.6414			399.52	42.0195	30.1167	40.2869	47.3745	36.6645	34.2601	25.9732	44.2628	36.3109
	400.902	83.3292	67.3525	61.4126	85.8492	80.8093	72.1427	62.5622	64.1036	58.7216			400.902	42.3894	30.2827	40.4302	47.9153	36.8635	34.8121	25.7533	44.0005	36.8598
	402.285	83.4681	67.4827	61.5707	85.9155	81.0207	72.7544	62.2111	64.2855	58.8558			402.285	42.5932	30.0043	39.8414	47.6891	37.4973	34.6294	25.3792	43.3635	36.3194
	403.667	83.2167	68.8389	62.4455	85.4554	80.978	75.0129	62.6649	65.0626	59.8284			403.667	42.3878	29.5105	39.9855	46.6244	38.1512	33.5914	25.4296	43.3071	36.6638
	405.05	82.8578	70.9327	61.6006	85.1613	80.5542	76.8301	65.0354	64.0333	59.1679			405.05	42.6999	29.0444	40.4477	47.0544	38.3454	33.4086	24.6803	43.7135	37.1819
	406.432	81.4647	69.3228	61.2255	83.8313	79.0982	74.7045	63.9412	63.84	58.611			406.432	42.8416	28.5068	41.4593	47.1173	38.5659	33.0613	23.9522	44.8006	38.1179
	407.815	81.8037	68.8414	62.5174	84.0542	79.5533	75.3069	62.3759	65.6066	59.4283			407.815	42.6047	28.1235	43.0171	47.3022	37.9071	32.8622	23.3848	46.2262	39.8079
	409.197	82.2118	69.6771	64.1361	84.5462	79.8773	75.1653	64.1889	67.6557	60.6165			409.197	42.3405	28.1704	44.573	46.7448	37.9363	33.1308	23.21	47.9977	41.1482
	410.579	83.7911	72.5432	64.645	86.0884	81.4938	78.0915	66.9949	68.277	61.0129			410.579	41.9681	30.3123	45.6106	46.4663	37.47	35.7549	24.8698	49.5593	41.662
	411.962	83.9282	69.4247	64.3933	85.7376	82.1189	75.3618	63.4876	68.0339	60.7527			411.962	41.736	31.6741	45.2308	46.4497	37.0223	37.2017	26.1464	48.8545	41.6071
	413.344	82.9839	69.9938	63.9419	84.8091	81.1587	75.8046	64.183	67.4272	60.4566			413.344	41.3523	32.6216	44.1376	46.1004	36.6043	38.3889	26.8543	47.2625	41.0128
	414.727	82.4075	69.8506	62.0781	84.0571	80.7579	75.088	64.6132	65.508	58.6482			414.727	41.0023	33.5142	43.201	46.4606	35.544	39.5453	27.4831	46.3443	40.0577
	416.109	81.7903	68.6778	62.2925	83.5189	80.0616	73.5102	63.8453	65.4757	59.1093			416.109	41.8304	33.4216	42.3998	46.6559	37.005	39.2136	27.6296	45.5698	39.2299
	417.491	82.0833	70.2148	61.9831	83.7753	80.3914	75.3069	65.1227	64.9709	58.9953			417.491	42.5694	33.021	41.8014	46.8564	38.2824	38.6684	27.3736	44.9785	38.6243
	418.874	82.6366	68.6488	61.2211	84.3879	80.8852	73.684	63.6136	64.142	58.3001			418.874	43.0769	31.9673	40.9287	47.6153	38.5386	37.6183	26.3163	44.0171	37.8404
	420.256	82.6824	69.2636	62.2707	84.8444	80.5204	74.3342	64.1929	65.0815	59.4599			420.256	44.0343	31.4821	40.0246	48.5138	39.5548	37.1029	25.8613	43.0766	36.9725
	421.639	82.5267	70.3562	61.8091	84.6598	80.3937	75.3162	65.3962	64.3488	59.2695			421.639	44.2875	31.4191	39.4525	49.2799	39.2951	36.7995	26.0388	42.3447	36.5603
	423.021	82.6334	69.9259	61.0526	84.6875	80.5794	76.2618	63.5901	63.5928	58.5124			423.021	43.5185	31.3173	39.5368	48.594	38.443	36.6945	25.9401	42.4007	36.6729
	424.404	82.0196	70.2549	61.8634	84.123	79.9163	74.8814	65.6285	64.2289	59.498			424.404	42.7458	31.113	39.8475	47.7056	37.7861	36.3984	25.8276	42.4151	37.2799
	425.786	81.0227	70.5333	61.9566	83.3266	78.7189	75.5485	65.5181	64.1792	59.7341			425.786	42.4937	31.6068	39.9795	47.4198	37.5676	36.8994	26.3142	42.9336	37.0254
	427.168	80.7476	69.4562	61.3119	82.7823	78.7129	74.8871	64.0252	63.593	59.0309			427.168	42.3689	32.1333	39.9082	48.0245	36.7133	37.5008	26.7658	42.5354	37.281
	428.551	81.2204	69.4809	60.9817	83.0769	79.364	74.1106	64.8511	63.3551	58.6083			428.551	42.2088	32.6691	40.0776	48.1875	36.2301	38.2433	27.0949	42.1583	37.9968
	429.933	80.0308	68.9197	61.3127	81.8456	78.216	73.8249	64.0146	63.904	58.7214			429.933	42.5098	33.9241	40.35	47.8356	37.1839	39.5442	28.3039	42.4617	38.2383
	431.316	80.0704	70.2278	61.6494	81.9506	78.1901	75.0694	65.3862	64.3144	58.9845			431.316	42.8775	34.7222	40.708	47.344	38.411	40.1572	29.2873	43.1697	38.2464
	432.698	80.8425	69.6259	61.8218	82.7308	78.9543	74.7138	64.5381	64.4627	59.1808			432.698	43.0786	34.7803	41.0446	48.168	37.9892	39.9613	29.5992	43.6222	38.467
	434.08	80.073	70.9512	60.8311	81.8069	78.3391	75.4073	66.4951	63.4577	58.2044			434.08	43.421	34.6154	41.1378	47.795	39.0471	39.9169	29.314	43.6363	38.6392
	435.463	80.496	70.4444	60.8899	82.4234	78.5685	74.4931	66.3958	63.5163	58.2635			435.463	43.6068	33.9488	41.0774	47.5556	39.658	38.9291	28.9685	43.8826	38.2722
	436.845	79.2857	68.984	61.2566	81.6529	76.9185	73.2523	64.7156	63.8301	58.6831			436.845	43.2475	32.2963	40.4182	47.3518	39.1431	36.6848	27.9078	42.8988	37.9377
	438.228	80.0078	71.0815	60.5124	82.6357	77.3798	75.4002	66.7628	63.0742	57.9507			438.228	42.9446	31.4117	39.8613	47.0714	38.8178	35.2906	27.5328	42.3061	37.4165
	439.61	79.8637	72.8784	59.2223	82.5939	77.1335	76.2079	69.5489	61.6391	56.8054			439.61	43.349	31.2284	39.3927	47.0297	39.6684	35.5088	26.9479	41.4652	37.3202
	440.993	79.9265	68.8784	60.7848	82.5218	77.3312	72.7368	65.02	63.2526	58.3169			440.993	43.6868	31.4197	39.6909	47.5449	39.8287	35.9482	26.8912	41.6719	37.7099
	442.375	80.9775	70.6068	61.8318	83.5916	78.3633	75.4069	65.8066	64.3211	59.3425			442.375	43.7163	31.9809	40.1453	48.3822	39.0504	36.5111	27.4507	42.3899	37.9007
	443.757	81.5505	72.4469	61.3467	84.0651	79.0359	76.8182	68.0756	63.7549	58.9386			443.757	43.3503	32.4963	40.6702	48.3859	38.3148	36.8279	28.1647	42.5145	38.8258
	445.14	80.6781	72.3556	60.8732	83.1121	78.2441	76.7028	68.0084	63.4738	58.2725			445.14	43.1286	32.8525	41.7138	47.4256	38.8316	37.5462	28.1587	43.6008	39.8268
	446.522	80.0349	71.0518	62.3886	82.2831	77.7866	76.6735	65.4302	65.2815	59.4956			446.522	43.7085	33.713	42.379	47.4458	39.9712	38.7278	28.6981	44.3243	40.4337
	447.905	79.202	72.834	62.1051	81.2413	77.1628	78.2522	67.4158	64.9212	59.289			447.905	44.2008	33.7963	42.3283	48.0146	40.3871	38.7277	28.8649	44.7939	39.8626
	449.287	78.7963	73.0704	61.8783	80.9471	76.6454	77.8697	68.271	64.5795	59.1771			449.287	44.5064	33.5747	42.1175	49.0532	39.9597	38.7461	28.4033	44.3699	39.8651
	450.67	79.4325	72.3691	61.8822	81.5441	77.321	77.1744	67.5639	64.4793	59.2851			450.67	44.2712	33.3648	42.2084	48.9606	39.5818	38.6929	28.0368	44.2802	40.1366
	452.052	78.9102	73.1383	61.5934	80.8731	76.9472	78.7698	67.5068	64.2013	58.9854			452.052	43.4082	33.6475	41.8617	47.5558	39.2606	39.6033	27.6918	44.3244	39.3989
	453.434	79.1264	74.2222	60.7496	81.5839	76.6689	79.9809	68.4635	63.4923	58.007			453.434	42.3395	33.7315	41.7891	46.319	38.3599	39.964	27.499	44.1103	39.4679
	454.817	79.167	74.229	59.8865	82.1697	76.1643	80.6327	67.8254	62.8397	56.9333			454.817	41.5538	33.8327	42.1369	45.7491	37.3585	40.0808	27.5846	44.2118	40.062
	456.199	79.5433	71.563	59.6044	82.8324	76.2541	76.9771	66.1488	62.5621	56.6466			456.199	40.8562	34.6506	41.8929	45.3969	36.3155	41.0659	28.2353	44.0664	39.7193
	457.582	79.5336	72.1185	60.5753	83.3217	75.7456	77.9928	66.2442	63.3748	57.7759			457.582	41.0648	34.1389	41.3757	45.6724	36.4572	40.2033	28.0744	43.6531	39.0983
	458.964	78.0858	70.771	60.7825	82.0458	74.1258	76.9822	64.5598	63.4656	58.0995			458.964	41.1908	33.5074	41.0417	45.4641	36.9176	39.227	27.7879	43.5971	38.4864
	460.346	77.8327	71.1068	59.698	81.6271	74.0384	77.0507	65.1629	62.3636	57.0324			460.346	41.2352	34.266	41.0886	45.7553	36.715	40.0365	28.4956	43.3512	38.8259
	461.729	78.208	72.279	58.7138	81.6821	74.7339	77.6267	66.9313	61.2891	56.1384			461.729	41.1036	33.3068	40.5915	45.9803	36.2268	38.9752	27.6384	43.1228	38.0603
	463.111	77.628	71.5525	59.4332	81.2249	74.031	76.5286	66.5763	61.8477	57.0187			463.111	41.2756	32.5303	39.4776	45.684	36.8672	37.9974	27.0631	41.8672	37.0879
	464.494	77.4931	69.3531	59.2423	81.1309	73.8552	74.6425	64.0636	61.5363	56.9483			464.494	41.2289	31.7673	38.4532	45.3203	37.1374	37.4531	26.0815	40.5919	36.3145
	465.876	78.2841	69.8352	59.6237	81.8918	74.6764	75.8751	63.7952	62.0548	57.1926			465.876	41.0984	31.8759	38.3706	45.4373	36.7595	37.568	26.1839	40.9783	35.763
	467.259	78.9292	72.4655	59.6059	82.482	75.3763	79.3468	65.5841	62.2275	56.9842			467.259	40.9489	31.8321	38.6047	45.4784	36.4193	37.5679	26.0963	41.0194	36.19
	468.641	79.9052	72.4543	59.5858	83.2145	76.596	78.2106	66.6981	62.1805	56.9912			468.641	40.7011	32.5031	38.9672	45.2997	36.1026	38.6853	26.3208	41.105	36.8295
	470.023	79.851	72.0438	58.9699	82.8586	76.8434	77.7539	66.3338	61.4293	56.5105			470.023	41.0745	32.7593	38.7235	46.4118	35.7372	39.4912	26.0273	41.406	36.041
	471.406	79.4795	72.971	59.2802	82.3625	76.5964	79.7475	66.1945	61.9571	56.6032			471.406	41.6707	32.7037	38.5492	46.2991	37.0424	39.4569	25.9506	41.2143	35.8841
	472.788	79.6769	73.9241	59.6677	82.5929	76.7609	81.735	66.1132	62.3021	57.0333			472.788	42.178	33.0006	37.8927	45.982	38.3739	39.7139	26.2874	40.5189	35.2664
	474.171	80.0974	73.8821	58.4642	83.1707	77.0241	79.7276	68.0366	60.9757	55.9526			474.171	42.6891	31.8741	37.5173	47.0173	38.361	38.3722	25.376	40.0046	35.0301
	475.553	79.445	74.5395	58.0424	82.6037	76.2864	80.6253	68.4537	60.6493	55.4356			475.553	42.9431	31.1006	37.2574	47.8004	38.0858	37.4509	24.7503	39.5122	35.0025
	476.935	78.4926	73.3858	58.0024	81.6386	75.3466	79.9423	66.8293	60.5634	55.4414			476.935	43.2058	30.6642	36.5282	47.7355	38.6761	36.8286	24.4998	38.9641	34.0922
	478.318	78.6639	72.2735	57.3599	81.8801	75.4478	78.9771	65.5698	59.9391	54.7808			478.318	43.4753	31.1531	36.052	47.2638	39.6869	37.1768	25.1294	38.967	33.137
	479.7	77.7385	71.8179	58.3188	80.9778	74.4992	78.9631	64.6727	60.8631	55.7746			479.7	43.1348	32.7105	35.6203	46.9532	39.3164	39.3438	26.0772	38.2906	32.95
	481.083	77.8073	70.7747	58.9592	81.1084	74.5063	76.6913	64.8581	61.6572	56.2612			481.083	43.0077	34.1648	35.6435	47.4226	38.5927	40.9871	27.3426	38.0545	33.2325
	482.465	78.5279	71.1883	57.4478	81.6685	75.3873	76.7838	65.5927	60.2772	54.6185			482.465	43.4932	34.9111	35.6353	48.1626	38.8238	42.0517	27.7705	38.1874	33.0832
	483.848	78.3894	71.2062	57.9673	81.0658	75.713	77.6552	64.7571	60.4998	55.4348			483.848	44.213	35.0716	34.6869	48.7197	39.7062	42.4822	27.661	37.6856	31.6882
	485.23	78.3748	70.2957	58.4348	80.7009	76.0487	77.4885	63.1029	61.0439	55.8258			485.23	44.36	34.9049	34.4688	49.0246	39.6953	42.3104	27.4995	37.8484	31.0891
	486.613	78.7599	70.5074	60.1187	81.2297	76.29	77.1033	63.9115	62.8813	57.3561			486.613	43.9089	34.3932	34.4504	48.9204	38.8974	41.7909	26.9955	37.7558	31.1449
	487.995	77.8637	68.8037	59.5634	80.478	75.2494	75.5501	62.0573	62.2699	56.8568			487.995	43.336	33.5617	33.9175	48.3211	38.351	41.2312	25.8922	36.9123	30.9227
	489.377	75.9993	69.0531	58.75	78.6164	73.3821	74.932	63.1742	61.5067	55.9932			489.377	43.3522	32.513	33.3863	47.5597	39.1447	39.841	25.1849	36.2555	30.5171
	490.76	75.3514	71.0198	57.5338	78.3876	72.3152	76.6606	65.3789	60.3525	54.7151			490.76	43.7184	30.3704	33.2046	47.6585	39.7783	37.3735	23.3672	35.8375	30.5717
	492.142	76.7786	70.2234	56.9291	80.2794	73.2779	76.3869	64.0599	59.727	54.1311			492.142	43.5798	29.3339	33.3596	47.9771	39.1825	35.945	22.7228	36.4789	30.2402
	493.525	77.5497	68.1568	58.5703	81.3618	73.7375	72.999	63.3146	61.2911	55.8495			493.525	43.1627	29.1099	33.3643	47.8751	38.4503	35.4648	22.755	36.532	30.1967
	494.907	76.9681	69.7148	58.3876	81.0194	72.9167	74.1862	65.2435	60.9756	55.7996			494.907	43.0344	28.5445	33.7742	47.4486	38.6202	34.5898	22.4991	37.3725	30.176
	496.289	76.2151	68.9617	56.88	80.3192	72.111	74.8517	63.0718	59.4282	54.3318			496.289	43.1652	28.0555	34.4142	47.4614	38.869	34.0373	22.0738	38.0992	30.7293
	497.672	74.9892	71.234	56.1129	79.153	70.8255	76.3939	66.074	58.8455	53.3804			497.672	42.8836	28.3055	34.8809	47.5871	38.1801	34.1374	22.4737	38.2186	31.5431
	499.054	76.5113	71.8105	55.8234	80.4602	72.5624	77.6834	65.9376	58.7175	52.9293			499.054	42.0358	28.7556	34.6481	46.5055	37.566	34.5943	22.9168	37.6621	31.6341
	500.437	76.9131	71.8123	56.5567	80.483	73.3432	77.394	66.2307	59.7061	53.4073			500.437	40.9237	28.8444	34.1701	45.0146	36.8327	34.4576	23.2312	37.7938	30.5464
	501.819	74.9164	68.2303	56.2846	78.3843	71.4485	73.3771	63.0834	59.6881	52.8812			501.819	40.2953	29.1093	33.3137	44.7079	35.8828	34.4992	23.7193	36.7359	29.8915
	503.202	74.2452	67.9926	56.7252	77.8017	70.6887	73.2406	62.7446	60.316	53.1343			503.202	40.1715	29.1043	32.587	44.5841	35.759	33.887	24.3216	36.4252	28.7489
	504.584	75.1116	69.9617	55.8175	78.701	71.5222	74.7033	65.2201	59.4281	52.2069			504.584	40.0582	29.029	32.5363	44.7233	35.393	33.364	24.694	36.4718	28.6008
	505.966	75.4678	69.4086	55.5994	78.9714	71.9642	74.3423	64.475	59.2133	51.9855			505.966	40.5326	28.6994	32.6388	45.348	35.7173	32.9159	24.4828	35.7164	29.5612
	507.349	76.2798	67.6796	56.4506	79.8659	72.6937	71.6808	63.6785	59.984	52.9171			507.349	41.6919	28.0913	32.4683	46.9051	36.4787	32.3017	23.8809	35.8014	29.1353
	508.731	75.6672	67.4432	56.1417	79.2123	72.1221	72.4099	62.4765	59.5296	52.7538			508.731	41.8313	27.1457	32.0542	46.7709	36.8917	31.3843	22.9071	36.0009	28.1076
	510.114	77.0573	67.1932	56.0963	80.6135	73.5012	72.3479	62.0385	59.4179	52.7748			510.114	41.5373	26.2222	31.7242	45.8314	37.2433	30.6033	21.8411	35.7988	27.6497
	511.496	75.7792	68.1883	54.6788	79.3125	72.2459	72.9492	63.4273	57.9561	51.4014			511.496	41.7458	25.7117	31.4899	46.0089	37.4826	30.4646	20.9588	35.1883	27.7916
	512.879	75.4391	67.471	55.3695	78.8205	72.0578	72.1691	62.7729	58.6706	52.0683			512.879	41.6694	25.2327	31.0897	46.1245	37.2143	30.1245	20.3409	34.3339	27.8456
	514.261	76.9554	65.437	55.4877	80.3271	73.5838	69.3541	61.5199	58.8553	52.1201			514.261	41.2128	25.9049	30.859	45.8988	36.5268	31.0645	20.7454	33.8507	27.8673
	515.643	76.0132	65.0642	55.1999	79.5811	72.4453	69.4045	60.7239	58.5633	51.8365			515.643	40.9614	26.4938	30.896	45.7112	36.2115	31.9684	21.0193	34.3573	27.4347
	517.026	76.2652	65.092	54.9404	79.9094	72.621	69.4794	60.7046	58.2108	51.6701			517.026	40.6862	25.9926	30.7118	45.3369	36.0355	31.0718	20.9134	33.9422	27.4814
	518.408	76.3968	64.5408	54.8751	79.9474	72.8461	68.7019	60.3796	58.0309	51.7193			518.408	40.5758	25.6728	30.8974	45.2229	35.9287	30.5374	20.8083	33.4525	28.3424
	519.791	77.1188	65.2574	55.2751	80.1316	74.106	69.8523	60.6625	58.2156	52.3347			519.791	40.4663	26.4414	31.0374	45.5318	35.4008	31.5503	21.3324	34.073	28.0018
	521.173	76.2298	66.0173	54.9768	78.9718	73.4877	70.5969	61.4377	57.8199	52.1337			521.173	41.2279	26.9747	31.0915	45.9481	36.5077	32.1023	21.847	34.1635	28.0194
	522.556	75.3157	63.2654	55.3944	78.1461	72.4852	67.4528	59.078	58.4907	52.2982			522.556	42.0033	27.1339	30.8996	46.5977	37.4088	32.3069	21.961	34.0408	27.7584
	523.938	75.4855	63.937	55.8207	78.3533	72.6178	68.566	59.3081	58.8858	52.7557			523.938	42.2681	26.8784	30.4826	46.9563	37.58	32.1144	21.6424	34.1803	26.785
	525.32	75.0575	63.7951	54.7554	78.0785	72.0365	67.7057	59.8844	57.7586	51.7522			525.32	41.947	26.6809	30.2083	46.3264	37.5676	31.772	21.5898	33.843	26.5735
	526.703	74.8106	63.4395	53.9792	78.1818	71.4394	67.3624	59.5165	56.9662	50.9922			526.703	41.9481	26.7932	30.0228	46.2219	37.6744	31.9276	21.6589	33.4958	26.5497
	528.085	75.9979	62.1469	54.2755	79.4844	72.5115	66.2791	58.0148	57.3844	51.1666			528.085	42.1663	26.3037	29.9929	46.7705	37.5621	31.4286	21.1788	33.4326	26.5533
	529.468	76.6236	62.6278	55.6775	80.108	73.1393	66.8379	58.4176	59.0759	52.279			529.468	42.0534	25.3055	30.6044	47.2639	36.8429	30.1216	20.4894	34.4887	26.7201
	530.85	76.8654	62.8617	56.1625	80.5779	73.1529	66.8895	58.8339	59.7416	52.5833			530.85	41.7506	24.4241	30.922	47.0817	36.4195	29.008	19.8401	34.9266	26.9173
	532.232	76.3184	63.6247	55.8972	80.2153	72.4214	67.833	59.4163	59.6331	52.1613			532.232	42.0063	23.466	31.0609	46.7942	37.2184	27.4877	19.4444	34.4142	27.7076
	533.615	75.9451	62.1648	54.4878	79.9166	71.9737	66.2509	58.0788	58.1997	50.7759			533.615	42.4039	23.471	30.8671	46.8331	37.9746	27.3834	19.5586	33.5122	28.222
	534.997	76.8108	61.2568	54.9006	80.6825	72.9391	65.9809	56.5327	58.5096	51.2916			534.997	42.7912	23.5265	30.6427	47.3828	38.1996	27.6028	19.4503	33.6016	27.6839
	536.38	76.1483	61.7988	54.9643	79.8317	72.4649	66.1492	57.4483	58.366	51.5626			536.38	43.2365	23.0414	30.4998	48.1588	38.3142	27.283	18.7998	34.148	26.8516
	537.762	75.5179	60.963	55.0506	79.0186	72.0173	65.277	56.6489	58.374	51.7273			537.762	42.8636	22.4876	30.3878	47.4429	38.2843	26.6534	18.3218	33.5773	27.1984
	539.144	75.084	61.6043	54.2138	78.5063	71.6616	66.3007	56.9079	57.6118	50.8157			539.144	42.0538	23.0099	30.4395	46.675	37.4325	27.4426	18.5771	33.5937	27.2852
	540.527	75.1023	60.1679	52.9764	78.605	71.5997	65.2373	55.0984	56.2887	49.664			540.527	41.4892	23.8018	30.4231	46.4832	36.4952	28.2876	19.3161	33.9867	26.8595
	541.909	75.4174	61.9025	54.5627	78.9215	71.9134	67.2228	56.5821	57.6429	51.4825			541.909	40.817	24.3049	29.9856	45.8803	35.7538	29.064	19.5459	33.1842	26.787
	543.292	75.7041	60.2364	55.0075	79.2452	72.1629	66.0472	54.4256	57.856	52.1591			543.292	40.5655	25.7617	29.3304	45.7709	35.36	30.5895	20.934	32.3256	26.3352
	544.674	76.0589	59.9741	54.5002	79.7327	72.3851	65.4343	54.5139	57.6265	51.374			544.674	40.4876	25.8735	29.9496	45.4349	35.5403	30.6297	21.1172	33.2404	26.6588
	546.057	75.672	61.2852	54.8234	79.2889	72.0552	67.0044	55.566	58.2449	51.402			546.057	40.2906	25.2037	30.4519	44.5936	35.9876	29.7047	20.7027	34.0887	26.8151
	547.439	74.897	60.3963	54.3456	78.0166	71.7775	65.5136	55.2789	57.7453	50.9459			547.439	40.0255	25.1321	30.3127	44.4334	35.6176	29.4424	20.8218	34.0314	26.594
	548.822	75.3243	59.7747	53.7791	78.0329	72.6157	64.4974	55.052	57.0459	50.5123			548.822	40.4535	25.4494	29.8496	45.2604	35.6466	29.9136	20.9852	33.3827	26.3166
	550.204	75.1048	59.8025	54.4758	77.816	72.3937	64.5513	55.0536	57.6594	51.2922			550.204	40.9152	25.2981	29.9351	45.6208	36.2095	29.8013	20.795	33.8208	26.0495
	551.586	75.3316	63.7346	54.1512	78.0009	72.6622	68.5408	58.9284	57.5387	50.7637			551.586	40.3263	25.6191	30.1667	45.5657	35.0869	30.3459	20.8924	33.8006	26.5329
	552.969	73.8929	63.2951	52.7569	76.614	71.1719	68.4493	58.1408	56.1758	49.338			552.969	39.6552	25.1728	30.0288	45.079	34.2314	29.9507	20.395	33.5972	26.4604
	554.351	74.0728	61.1981	52.7358	76.8748	71.2709	66.0872	56.309	56.0011	49.4706			554.351	39.3781	25.0907	29.9216	44.2804	34.4759	29.9601	20.2214	33.7617	26.0816
	555.734	74.4244	61.6161	53.9252	77.2546	71.5942	66.1147	57.1175	57.1274	50.7229			555.734	39.752	24.987	29.5735	44.7402	34.7637	29.9981	19.976	33.2093	25.9377
	557.116	75.2303	61.4235	53.947	77.9177	72.5428	66.6393	56.2076	57.1486	50.7454			557.116	39.23	25.7802	29.1021	44.5849	33.8752	30.8427	20.7178	32.6356	25.5687
	558.498	75.0493	61.5895	54.2297	77.8304	72.2682	66.9508	56.2282	57.5761	50.8833			558.498	38.5654	26.1821	28.9334	43.5749	33.556	31.1468	21.2174	32.5307	25.3362
	559.881	73.5609	61.4821	52.9729	76.4604	70.6614	66.5093	56.4549	56.4483	49.4974			559.881	38.4243	24.9667	29.0612	42.9562	33.8925	29.8136	20.1197	32.3574	25.765
	561.263	72.5691	61.2914	53.2667	75.3875	69.7508	66.6479	55.9349	56.8583	49.6752			561.263	38.5744	24.3716	29.6235	43.2845	33.8644	29.2306	19.5126	32.9309	26.316
	562.646	73.9221	59.8395	52.4579	76.6819	71.1622	65.2326	54.4464	56.0289	48.8868			562.646	38.4275	24.5796	29.9061	43.3916	33.4635	29.5963	19.563	33.1544	26.6578
	564.028	72.1444	57.8537	53.0182	74.6744	69.6145	63.0903	52.6171	56.6306	49.4057			564.028	38.2621	24.3278	29.9172	43.2279	33.2962	29.4559	19.1996	33.3579	26.4765
	565.41	71.3796	59.1988	53.1424	73.4894	69.2697	64.6598	53.7378	56.8071	49.4778			565.41	38.3857	24.0883	30.2872	43.5176	33.2538	29.3054	18.8712	33.6114	26.963
	566.793	72.5171	58.9722	53.4154	74.3137	70.7204	64.9419	53.0026	56.985	49.8457			566.793	38.7151	23.4346	30.3259	43.6935	33.7367	28.4813	18.3879	33.5809	27.0708
	568.175	72.4096	57.3914	53.4065	74.0167	70.8026	63.2941	51.4887	56.8138	49.9992			568.175	38.5507	23.3154	30.3334	43.2399	33.8615	28.1093	18.5215	34.2258	26.4409
	569.558	72.054	57.7692	52.5347	73.7776	70.3304	63.8144	51.724	55.8541	49.2154			569.558	38.4216	22.879	30.3397	43.4756	33.3676	27.0452	18.7128	34.0836	26.5958
	570.94	72.7702	57.2821	52.3133	75.0705	70.4699	63.3547	51.2094	55.6166	49.01			570.94	38.4674	21.8531	30.3505	43.9714	32.9635	25.5546	18.1516	33.6974	27.0036
	572.323	71.8892	58.4932	52.6118	74.8431	68.9353	64.4602	52.5262	55.8154	49.4082			572.323	37.8993	22.7154	30.1702	43.5836	32.215	26.3681	19.0627	33.0461	27.2943
	573.705	71.1599	57.3531	52.3939	74.5233	67.7965	63.2884	51.4178	55.3917	49.3961			573.705	37.2316	23.6376	29.8301	42.6688	31.7944	27.4126	19.8626	33.2141	26.446
	575.087	71.4284	55.8457	52.9311	75.0285	67.8282	61.3435	50.3478	55.7894	50.0728			575.087	37.1635	24.2562	29.4612	42.7446	31.5824	28.2148	20.2975	33.0092	25.9132
	576.47	71.65	56.5821	53.0016	75.6953	67.6047	61.7352	51.4289	56.0499	49.9533			576.47	38.3276	23.9278	29.3398	44.2675	32.3877	27.3804	20.4752	32.5607	26.1188
	577.852	70.7411	57.5587	52.0089	75.2137	66.2684	62.7077	52.4097	55.2246	48.7932			577.852	39.1371	23.8006	28.8982	45.1226	33.1516	27.1166	20.4846	32.0528	25.7436
	579.235	70.3792	58.8334	52.0748	74.8475	65.9109	63.1506	54.5161	55.2092	48.9404			579.235	39.491	23.7586	28.6645	44.9807	34.0013	27.4289	20.0884	31.7352	25.5939
	580.617	71.7794	59.4303	51.5962	75.9271	67.6317	63.6165	55.2441	54.7285	48.4638			580.617	39.3331	23.8593	28.649	44.4556	34.2105	27.717	20.0015	31.4817	25.8163
	582	71.5399	56.7222	52.4721	75.5813	67.4985	60.5209	52.9236	55.4527	49.4914			582	38.4519	22.9722	28.6972	43.8906	33.0132	26.9224	19.022	31.2724	26.1221
	583.382	70.7909	57.2167	51.8394	74.8886	66.6931	61.1021	53.3312	54.5987	49.0802			583.382	37.7489	22.121	28.8367	43.4771	32.0207	26.1963	18.0456	31.6249	26.0486
	584.764	70.6177	57.8259	51.6192	74.6299	66.6055	61.8801	53.7718	54.4381	48.8002			584.764	37.7119	21.2833	28.7001	43.1822	32.2417	25.1894	17.3773	31.5463	25.8538
	586.147	69.3094	56.6241	51.7582	73.0214	65.5973	60.9699	52.2782	54.5336	48.9829			586.147	37.5965	20.4759	28.485	42.8166	32.3763	23.9751	16.9767	31.4875	25.4825
	587.529	69.5435	57.9321	51.9765	73.1473	65.9398	62.6269	53.2373	54.5501	49.4029			587.529	37.5117	20.2105	28.2615	43.1606	31.8629	23.7488	16.6722	30.8621	25.6609
	588.912	70.8598	55.9111	50.9123	74.6278	67.0918	59.4329	52.3894	53.4368	48.3877			588.912	37.3888	19.866	27.8611	43.8012	30.9764	23.6161	16.1159	30.4721	25.2501
	590.294	69.7316	57.8691	52.817	73.6136	65.8497	62.0174	53.7209	55.5082	50.1258			590.294	36.8463	20.3988	27.5607	42.6694	31.0231	24.092	16.7055	31.0373	24.0841
	591.677	69.5009	56.7667	53.0975	73.0942	65.9076	60.2586	53.2747	55.962	50.2331			591.677	36.1053	21.5513	27.4463	41.3429	30.8676	25.3388	17.7638	30.7717	24.1209
	593.059	70.1429	58.9574	52.5921	73.4132	66.8727	62.5458	55.369	55.5411	49.643			593.059	35.6072	22.237	27.2138	40.8055	30.4088	26.4261	18.048	30.2097	24.2179
	594.441	71.1914	56.0611	52.3641	74.604	67.7789	59.4571	52.6652	55.3941	49.334			594.441	35.1392	22.6864	27.4897	41.074	29.2045	26.9887	18.3842	30.5167	24.4627
	595.824	71.2345	56.5796	50.7969	74.8287	67.6403	59.9079	53.2514	53.9403	47.6534			595.824	35.0949	22.3031	26.8828	41.3122	28.8776	26.5053	18.1009	29.7321	24.0335
	597.206	68.985	55.8401	50.7528	72.7329	65.237	59.0652	52.615	54.0187	47.4869			597.206	35.4004	22.2642	26.8334	41.0235	29.7774	26.377	18.1514	29.7453	23.9215
	598.589	69.7486	55.4975	51.4387	73.3974	66.0997	58.6363	52.3587	54.6233	48.2541			598.589	35.326	21.105	27.2309	40.5201	30.1319	24.9433	17.2667	30.2513	24.2106
	599.971	70.9626	56.4957	51.2506	74.5436	67.3816	60.0329	52.9584	54.2789	48.2224			599.971	35.3766	20.4012	27.4264	41.0661	29.6871	24.1772	16.6252	30.7287	24.1241
	601.354	69.5693	56.8093	51.3218	73.2048	65.9337	60.864	52.7545	54.4027	48.2408			601.354	35.6763	19.8624	27.3753	41.1827	30.1698	23.6017	16.123	30.8504	23.9002
	602.736	69.6496	55.6981	51.6634	73.5342	65.7651	59.8426	51.5536	54.8866	48.4402			602.736	36.108	19.1191	27.2041	41.3624	30.8535	22.7844	15.4538	30.499	23.9091
	604.118	67.9577	55.1784	50.7486	71.7466	64.1688	60.0454	50.3114	53.9227	47.5746			604.118	35.7105	19.5068	27.3513	40.6887	30.7322	23.3429	15.6707	31.0796	23.6231
	605.501	67.5691	54.2037	52.0593	71.1903	63.948	59.2146	49.1928	55.1408	48.9777			605.501	35.7927	19.6624	27.4077	40.6998	30.8856	23.469	15.8557	31.5495	23.266
	606.883	68.8284	54.0475	52.7971	72.281	65.3758	58.392	49.703	56.0527	49.5415			606.883	35.3927	19.6475	27.03	40.5901	30.1953	23.5477	15.7474	30.7444	23.3157
	608.266	68.7652	55.3253	52.2477	72.3481	65.1822	60.003	50.6477	55.7481	48.7472			608.266	35.1748	19.7728	26.8322	40.7091	29.6405	23.6456	15.9	30.4589	23.2054
	609.648	67.4006	55.4321	50.8817	71.0932	63.708	59.9906	50.8736	54.2224	47.5411			609.648	35.351	20.4599	26.3097	40.5005	30.2015	24.9645	15.9552	29.6945	22.925
	611.03	66.2764	54.3031	51.9718	69.7205	62.8323	58.6921	49.9141	55.2125	48.731			611.03	35.3088	20.0568	26.294	40.1552	30.4624	24.5058	15.6078	30.0026	22.5854
	612.413	67.426	55.4877	53.4763	70.691	64.161	60.6304	50.3449	56.7619	50.1907			612.413	35.3515	19.626	26.393	40.2983	30.4047	23.7367	15.5152	30.6472	22.1387
	613.795	68.592	53.2778	53.0076	71.7436	65.4405	57.5544	49.0012	56.2359	49.7794			613.795	35.3006	20.0722	26.4401	40.1959	30.4053	24.3348	15.8096	30.6374	22.2428
	615.178	67.4495	52.563	51.2126	70.7356	64.1635	56.364	48.762	54.3912	48.034			615.178	34.8643	19.8278	26.4082	39.3254	30.4031	24.4786	15.1769	30.4123	22.4042
	616.56	67.1977	51.7185	49.8728	70.876	63.5194	55.517	47.92	53.312	46.4336			616.56	34.2583	18.6234	26.3754	38.6272	29.8893	22.8769	14.37	30.3504	22.4004
	617.943	67.7168	52.7735	50.492	71.5004	63.9332	56.9542	48.5928	54.2878	46.6961			617.943	34.1534	18.787	27.0279	38.8818	29.425	22.7863	14.7878	30.2415	23.8143
	619.325	67.9231	52.9599	50.479	71.3862	64.46	56.9415	48.9782	54.4995	46.4585			619.325	34.1653	18.8994	27.5181	39.0938	29.2368	23.002	14.7968	31.0621	23.9741
	620.707	68.8113	52.7395	49.675	71.984	65.6386	56.8163	48.6627	53.9272	45.4229			620.707	33.97	18.6531	27.6502	39.227	28.7129	22.6516	14.6546	31.2671	24.0334
	622.09	67.3936	53.4457	50.6514	70.1764	64.6109	57.4117	49.4796	54.7015	46.6012			622.09	33.1213	18.1216	27.1192	38.1773	28.0654	21.751	14.4922	30.4947	23.7437
	623.472	65.7261	51.395	50.551	68.4486	63.0035	55.301	47.4891	54.3038	46.7982			623.472	32.3218	17.1661	26.6402	36.8026	27.841	20.3633	13.9688	30.0852	23.1952
	624.855	66.0309	51.892	50.5876	68.9614	63.1004	56.0821	47.7018	54.0927	47.0825			624.855	32.2297	16.5833	26.1831	37.0523	27.407	19.4873	13.6794	29.7942	22.572
	626.237	66.2507	52.8346	49.7765	69.4492	63.0522	56.8145	48.8546	53.5408	46.0122			626.237	33.0745	16.4593	25.9371	38.2357	27.9132	19.462	13.4566	29.381	22.4931
	627.62	66.6906	52.4871	49.4266	70.0555	63.3256	56.3678	48.6063	53.2879	45.5654			627.62	33.8057	16.4019	25.4404	38.7468	28.8646	19.6858	13.1179	29.0945	21.7863
	629.002	66.6982	51.5123	49.5972	70.3049	63.0916	55.5596	47.4651	53.0945	46.1			629.002	34.4909	15.5617	24.871	39.2049	29.7769	18.7807	12.3428	28.5992	21.1427
	630.384	67.1035	52.1216	50.2745	70.8893	63.3177	55.4083	48.8349	53.4028	47.1463			630.384	34.624	15.3562	24.3405	39.6889	29.559	18.3671	12.3452	28.0178	20.6631
	631.767	66.7883	52.2371	50.3868	70.4107	63.1658	55.3309	49.1432	53.6007	47.1729			631.767	33.8546	15.6765	24.3014	39.369	28.3402	18.6305	12.7226	27.9722	20.6307
	633.149	64.9094	52.7599	50.6259	68.4093	61.4095	56.49	49.0298	54.0836	47.1683			633.149	33.661	15.7315	24.2998	39.2027	28.1193	18.5834	12.8796	28.2803	20.3192
	634.532	64.8468	52.4272	49.5962	68.4353	61.2584	56.551	48.3033	53.2478	45.9447			634.532	33.7103	15.8679	23.983	38.8514	28.5693	18.9871	12.7487	28.0101	19.9559
	635.914	65.3065	52.9012	48.9618	69.01	61.603	56.4912	49.3113	52.8823	45.0412			635.914	33.5023	15.7728	23.773	38.432	28.5727	18.8054	12.7402	27.546	19.9999
	637.297	65.5204	50.8889	49.0198	69.3909	61.6498	53.7818	47.9959	52.9778	45.0618			637.297	33.4257	15.4562	23.4982	38.7577	28.0937	18.4681	12.4443	27.264	19.7324
	638.679	65.5941	51.6241	49.2497	69.7438	61.4445	54.4149	48.8333	52.9142	45.5852			638.679	33.458	15.5901	22.9649	38.8044	28.1117	18.8202	12.3601	26.7565	19.1733
	640.061	65.3269	53.9852	49.4818	69.3603	61.2936	57.554	50.4163	52.9258	46.0379			640.061	32.899	15.8809	22.5382	37.8429	27.9551	19.2747	12.487	26.4932	18.5833
	641.444	65.263	52.2006	49.1136	69.0838	61.4422	55.4709	48.9303	52.68	45.5472			641.444	32.2433	15.9556	22.4444	37.7032	26.7834	19.497	12.4141	26.2149	18.6739
	642.826	65.0558	51.6494	48.662	68.9234	61.1882	55.4266	47.8721	52.2105	45.1135			642.826	32.3072	16.1932	22.6868	37.8631	26.7513	19.9754	12.411	26.4175	18.9561
	644.209	64.4919	52.3179	49.8558	68.3579	60.626	56.2251	48.4107	53.2195	46.492			644.209	32.2162	15.8543	22.6249	37.1621	27.2703	19.7578	11.9509	26.6313	18.6186
	645.591	63.7895	53.0185	50.5353	67.6102	59.9688	56.9146	49.1224	53.7655	47.3051			645.591	31.3571	14.7487	22.8078	36.2056	26.5085	18.4592	11.0383	26.548	19.0676
	646.973	63.3911	52.2124	49.0391	67.1332	59.6491	55.9133	48.5114	52.1888	45.8895			646.973	30.7504	14.4599	22.8304	36.0091	25.4916	18.2929	10.6268	26.1096	19.5513
	648.356	63.9225	51.5315	47.5645	67.5579	60.287	56.0964	46.9666	50.5873	44.5416			648.356	30.4082	14.2667	22.425	36.0013	24.815	17.9666	10.5668	25.7164	19.1335
	649.738	64.4299	51.787	48.6563	67.9412	60.9186	56.0829	47.4912	51.5614	45.7512			649.738	30.1852	13.3488	22.4188	35.4498	24.9206	16.898	9.79953	26.2114	18.6262
	651.121	64.2006	50.4593	48.5659	67.6822	60.719	54.052	46.8665	51.4424	45.6895			651.121	30.3759	12.7525	22.391	35.1442	25.6077	15.9261	9.57882	25.7417	19.0402
	652.503	63.228	50.3796	47.2556	66.605	59.8511	53.9478	46.8115	50.0564	44.4548			652.503	31.03	12.2155	21.7591	35.2253	26.8348	15.2551	9.17578	25.0296	18.4886
	653.886	64.0941	50.158	48.7264	67.5188	60.6693	53.7246	46.5914	51.4369	46.0159			653.886	31.4578	11.9846	21.2341	35.6183	27.2972	15.0912	8.8779	24.9623	17.506
	655.268	63.9796	49.9932	49.0004	67.7646	60.1945	54.2934	45.693	51.5056	46.4953			655.268	31.4859	11.9093	20.8933	35.8229	27.1489	15.2681	8.55038	24.5163	17.2703
	656.65	64.5939	52.4846	48.3955	68.6251	60.5627	56.7599	48.2092	50.8623	45.9287			656.65	31.6204	11.571	20.504	36.8776	26.3633	14.8079	8.33406	24.2311	16.7768
	658.033	64.3152	53.8068	48.3396	68.4648	60.1656	57.4582	50.1554	50.9074	45.7718			658.033	31.8772	11.1093	20.2359	37.2619	26.4925	14.3274	7.89108	23.7787	16.6931
	659.415	64.1743	52.7895	47.8062	68.419	59.9297	56.1815	49.3976	50.4995	45.1129			659.415	31.654	11.4123	20.2619	36.5962	26.7117	14.5581	8.26656	23.6022	16.9215
	660.798	63.3665	50.5488	48.4198	67.7669	58.966	54.2043	46.8932	51.0545	45.7851			660.798	31.6059	10.9735	19.9917	36.3398	26.8719	13.9293	8.01761	23.9086	16.0748
	662.18	63.2322	48.4278	49.5672	67.7894	58.675	52.3772	44.4784	52.288	46.8464			662.18	32.0279	10.6167	20.0272	36.9754	27.0804	13.5374	7.69596	24.1599	15.8945
	663.562	63.24	50.0099	48.9882	67.5603	58.9197	54.4392	45.5806	51.8718	46.1045			663.562	32.3509	10.8482	19.8914	37.0466	27.6552	14.0398	7.65656	24.1164	15.6664
	664.945	63.7511	49.4216	48.6873	67.6255	59.8767	53.1301	45.7131	51.8992	45.4754			664.945	32.1974	10.5624	19.8794	37.17	27.2247	13.5623	7.56237	23.8819	15.877
	666.327	64.0468	50.2457	49.1741	67.8491	60.2445	53.8352	46.6561	52.7176	45.6307			666.327	31.8238	10.1864	19.8588	36.8021	26.8454	13.1805	7.19238	23.9032	15.8145
	667.71	63.7723	50.4383	49.0726	67.7466	59.798	53.9588	46.9177	52.8101	45.3352			667.71	31.5015	9.6222	19.8597	36.3768	26.6262	12.4652	6.77923	24.2223	15.4972
	669.092	62.9748	50.4772	49.7103	67.1665	58.783	54.9846	45.9697	53.5241	45.8966			669.092	31.2503	10.2426	20.117	36.3714	26.1292	12.9917	7.49341	24.2176	16.0165
	670.475	61.5329	51.5506	50.1242	65.7328	57.3329	55.9569	47.1443	53.9398	46.3086			670.475	30.8062	10.3481	20.2535	35.5929	26.0196	13.1517	7.54455	24.0668	16.4403
	671.857	62.3135	51.9019	49.8357	66.3258	58.3011	56.0357	47.768	53.7251	45.9463			671.857	30.6262	10.1519	20.2597	35.1917	26.0606	12.959	7.34471	24.6509	15.8684
	673.239	63.5378	52.3136	49.5015	67.3282	59.7474	56.4677	48.1594	53.3418	45.6611			673.239	30.9621	9.7	20.0095	35.6883	26.2358	12.523	6.87705	24.584	15.4351
	674.622	63.1745	51.5031	49.2163	66.7045	59.6444	55.5954	47.4107	53.0435	45.389			674.622	30.8176	9.74198	19.8344	35.6505	25.9847	12.6664	6.81754	23.99	15.6787
	676.004	63.1893	51.1315	49.7232	66.6195	59.7591	54.8442	47.4187	53.4816	45.9648			676.004	30.2604	9.90494	19.9747	35.2065	25.3142	12.7598	7.05003	24.4222	15.5272
	677.387	62.2173	50.7883	49.667	65.5645	58.8702	53.8605	47.7161	53.2111	46.1229			677.387	29.8169	10.4185	19.7135	34.3886	25.2452	13.1042	7.73287	23.7467	15.6803
	678.769	61.6774	49.5321	49.7662	64.7154	58.6393	53.2511	45.8131	53.261	46.2715			678.769	28.8589	10.4315	19.5405	33.2328	24.485	12.7961	8.06685	23.7132	15.3677
	680.152	62.5475	54.3333	48.6394	65.3371	59.7579	59.3415	49.3252	52.1156	45.1632			680.152	27.8847	10.9549	19.1884	32.4175	23.3518	13.4706	8.43932	23.0103	15.3665
	681.534	62.1339	54.1136	49.1574	65.2472	59.0206	58.3997	49.8275	52.55	45.7648			681.534	27.5709	10.5914	19.3016	32.0232	23.1186	12.9063	8.27643	23.4725	15.1306
	682.916	62.1921	52.9926	49.3951	65.5139	58.8703	56.443	49.5422	52.636	46.1541			682.916	27.6745	9.90986	19.4252	32.6078	22.7412	12.0638	7.75593	23.9972	14.8533
	684.299	62.8646	53.5648	50.2827	66.1046	59.6247	58.1533	48.9763	53.4149	47.1505			684.299	28.0939	9.1426	18.972	32.6987	23.4891	11.1593	7.12586	23.567	14.3771
	685.681	63.6753	51.8346	49.2864	66.7235	60.6272	56.2375	47.4317	52.3675	46.2054			685.681	28.8546	8.32838	18.5591	32.8865	24.8227	10.2072	6.44952	23.0341	14.0841
	687.064	63.0307	53.2303	49.2553	66.0029	60.0586	58.2279	48.2327	52.254	46.2565			687.064	29.0828	7.8821	17.9018	33.8605	24.3052	9.58988	6.17432	22.3452	13.4584
	688.446	61.819	53.5395	49.2302	64.9555	58.6826	58.2987	48.7804	52.282	46.1784			688.446	28.4066	7.93084	17.4371	33.4288	23.3843	9.74969	6.11199	21.968	12.9062
	689.828	62.3895	54.0778	48.8367	65.6556	59.1233	59.2556	48.8999	52.0503	45.623			689.828	27.8011	7.78888	17.0143	32.2453	23.3569	9.49478	6.08298	21.1808	12.8478
	691.211	63.6746	53.8414	48.2979	67.0362	60.313	58.2588	49.4239	51.443	45.1529			691.211	28.0783	7.34752	16.5714	32.803	23.3537	9.03676	5.65828	20.7168	12.4259
	692.593	63.6271	53.4185	47.3885	67.0637	60.1904	58.3651	48.4719	50.3552	44.4219			692.593	28.1741	7.31172	16.0161	32.881	23.4672	8.99298	5.63046	20.2507	11.7815
	693.976	61.9896	53.5043	47.7198	65.7496	58.2297	58.9139	48.0948	50.8361	44.6035			693.976	28.3658	7.0216	16.1307	32.8031	23.9284	8.53868	5.50452	20.1966	12.0647
	695.358	61.0218	52.2568	47.6791	65.2671	56.7766	58.0405	46.4731	50.9047	44.4536			695.358	28.6942	6.75186	16.2229	33.1168	24.2717	8.39097	5.11275	20.6154	11.8304
	696.741	61.4256	54.7463	48.4714	66.0754	56.7759	60.511	48.9817	51.7581	45.1846			696.741	29.4006	6.67656	16.0381	33.5972	25.2041	8.42024	4.93288	20.2874	11.7889
	698.123	60.8835	56.8364	48.4776	65.751	56.016	63.1617	50.5112	51.7772	45.178			698.123	29.0056	6.42962	15.9114	32.932	25.0792	8.13452	4.72472	20.2545	11.5682
	699.505	59.9739	56.4593	48.7387	64.9837	54.9641	62.4406	50.4779	52.0641	45.4132			699.505	28.1735	5.97284	15.6363	32.5403	23.8068	7.54513	4.40055	20.1463	11.1262
	700.888	60.1867	55.2117	48.4096	65.4648	54.9086	60.3262	50.0973	52.0894	44.7299			700.888	28.2085	6.02904	16.1832	32.6106	23.8064	7.65512	4.40296	20.579	11.7874
	702.27	61.5396	54.7333	47.964	66.9984	56.0809	60.1338	49.3329	52.0389	43.889			702.27	28.0558	6.79446	16.6754	32.3283	23.7834	9.55323	4.03569	20.8571	12.4937
	703.653	61.8605	54.0994	48.2491	67.2538	56.4673	59.4773	48.7216	52.3925	44.1057			703.653	27.6849	7.3389	16.6907	32.23	23.1397	10.7121	3.96565	20.9872	12.3943
	705.035	62.0357	55.0265	48.7603	67.3769	56.6946	61.0054	49.0477	52.9257	44.595			705.035	27.2097	6.83704	16.7434	31.9255	22.4938	10.1293	3.54482	21.2691	12.2177
	706.418	61.2596	54.1679	48.9967	66.5355	55.9838	60.1388	48.197	53.1651	44.8284			706.418	26.5617	6.82098	16.7251	31.3329	21.7906	10.1188	3.52314	21.3285	12.1216
	707.8	61.3641	55.0278	48.941	66.3138	56.4145	61.6487	48.4068	53.1762	44.7058			707.8	25.5334	6.29448	16.9299	30.6088	20.458	9.17712	3.41184	21.3245	12.5353
	709.182	60.8447	55.7889	49.4109	65.4538	56.2356	62.1008	49.4769	53.7674	45.0544			709.182	24.3342	5.44754	17.1994	29.3956	19.2728	7.80703	3.08805	21.8746	12.5243
	710.565	59.8221	53.5105	49.1578	64.3137	55.3306	59.0019	48.019	53.4506	44.865			710.565	23.7863	4.56356	17.1787	28.4483	19.1244	6.22858	2.89854	21.8399	12.5175
	711.947	60.597	55.1747	49.5155	65.173	56.0211	60.6573	49.6921	53.7063	45.3246			711.947	23.6698	4.04076	16.9964	28.4332	18.9064	5.63458	2.44694	21.5861	12.4068
	713.33	60.9729	56.7685	49.2444	65.6147	56.331	62.6922	50.8448	53.32	45.1688			713.33	23.6243	3.92654	16.479	28.4854	18.7631	5.61438	2.2387	21.0111	11.9469
	714.712	58.9334	54.7494	48.9267	63.5576	54.3092	61.1171	48.3816	52.8228	45.0306			714.712	23.5161	3.63024	15.6172	27.6563	19.3759	4.96484	2.29564	20.1293	11.1052
	716.095	58.8845	56.8667	49.3502	63.4258	54.3431	63.1866	50.5468	53.0736	45.6268			716.095	23.0337	3.57592	15.0672	27.1898	18.8776	4.85751	2.29433	19.6668	10.4675
	717.477	58.8751	56.6389	49.4456	63.3074	54.4429	63.0165	50.2613	53.0151	45.876			717.477	22.3126	3.52036	14.5974	26.7312	17.8941	4.8545	2.18622	19.5444	9.65044
	718.859	59.0889	57.5654	48.6371	63.4652	54.7126	64.0415	51.0893	52.068	45.2063			718.859	22.1694	3.4321	14.3524	26.4815	17.8574	4.72512	2.13908	18.9106	9.79424
	720.242	58.836	58.0876	47.288	63.3127	54.3593	64.7359	51.4394	50.7752	43.8009			720.242	22.5489	3.22592	14.6045	26.8379	18.2599	4.44437	2.00747	18.5731	10.6359
	721.624	58.7393	58.079	47.1844	63.3725	54.1062	63.2164	52.9417	50.6446	43.7242			721.624	23.075	2.98088	14.4465	27.4333	18.7167	4.07548	1.88628	18.4577	10.4352
	723.007	58.3087	56.4889	47.3268	63.0109	53.6066	62.0296	50.9482	50.7204	43.9332			723.007	23.0476	3.17468	14.0476	27.281	18.8141	4.1342	2.21516	18.2134	9.88176
	724.389	58.7473	55.8142	47.24	63.5324	53.9621	61.5513	50.0771	50.708	43.772			724.389	23.2268	2.77656	13.9612	27.5409	18.9127	3.73658	1.81654	18.1534	9.76904
	725.771	59.1787	55.2018	48.026	64.0703	54.287	61.3959	49.0078	51.4856	44.5664			725.771	23.4728	2.93644	14.0043	28.0399	18.9058	3.97991	1.89297	17.892	10.1166
	727.154	58.7959	53.3722	49.021	63.6208	53.971	59.4146	47.3299	52.5154	45.5267			727.154	23.1619	3.12282	13.8701	27.493	18.8307	4.17357	2.07207	18.4156	9.32452
	728.536	59.2447	55.7018	47.7756	64.0426	54.4469	61.8519	49.5518	51.1407	44.4104			728.536	22.9795	3.09198	13.3576	27.404	18.5549	4.0481	2.13586	17.984	8.7313
	729.919	59.8266	56.6093	47.0237	64.7514	54.9018	63.2472	49.9714	50.414	43.6333			729.919	22.9873	2.90368	13.1919	27.8487	18.1258	3.8119	1.99546	16.8892	9.49459
	731.301	59.6463	58.6586	47.5772	64.6133	54.6792	65.2702	52.047	51.0533	44.1011			731.301	22.6337	2.80372	13.2619	26.9995	18.2679	3.68224	1.9252	17.1677	9.35612
	732.684	59.4561	56.8951	48.5944	64.5205	54.3916	63.1297	50.6604	52.0694	45.1194			732.684	22.6269	2.64754	13.2306	26.8956	18.3582	3.42898	1.8661	17.3363	9.12498
	734.066	59.208	55.8309	47.8855	64.4886	53.9275	63.0881	48.5737	51.3133	44.4577			734.066	22.7726	2.50682	13.2099	27.2897	18.2556	3.20927	1.80437	16.8144	9.60545
	735.448	59.637	55.1642	46.8484	65.0512	54.2227	62.3692	47.9592	50.327	43.3697			735.448	22.8454	2.6778	12.9353	27.3591	18.3318	3.39973	1.95587	16.4904	9.38025
	736.831	59.7611	57.142	47.7608	65.1224	54.3998	64.1649	50.1191	51.4313	44.0903			736.831	22.5808	2.74076	12.9707	27.0107	18.1509	3.54541	1.93611	16.398	9.54332
	738.213	60.2151	57.5482	47.5965	65.476	54.9543	63.8679	51.2284	51.2286	43.9644			738.213	22.3632	2.62162	12.9785	26.848	17.8783	3.51723	1.72601	16.6686	9.2885
	739.596	59.858	57.0333	47.1571	65.0687	54.6474	64.5942	49.4725	50.7357	43.5784			739.596	22.2067	2.37902	12.7925	26.482	17.9315	3.14291	1.61513	16.4317	9.15337
	740.978	59.8517	56.7068	47.6311	65.0683	54.635	63.3059	50.1077	51.3398	43.9225			740.978	22.3815	2.4963	12.3401	26.8938	17.8691	3.2331	1.7595	15.9341	8.74615
	742.361	59.5492	54.3932	47.5478	64.6886	54.4099	61.1344	47.652	51.3542	43.7415			742.361	22.2187	2.13272	12.26	27.3513	17.0861	2.78386	1.48158	16.007	8.513
	743.743	59.056	56.0642	46.8327	64.1581	53.9539	62.9318	49.1966	50.9122	42.7533			743.743	22.1457	2.12038	12.6937	27.2015	17.09	2.72071	1.52005	16.2651	9.1223
	745.125	57.1696	56.7333	46.1225	62.1615	52.1778	63.6563	49.8103	50.4681	41.7769			745.125	22.2014	2.31606	13.0644	26.94	17.4627	2.93739	1.69473	16.4684	9.66045

## Sheet: 1H
	Con	DE	LRx
	95.1534	55.3649	48.3708
	56.234	113.844	40.0476
	86.2812	104.087	53.2555
	131.679	85.8552	36.0446
	130.653	101.609	66.3927
mean	100	92.152	48.8223

## Sheet: 1I
	On PV+ Soma		Off PV+ Soma
	Con	LRx	Con	LRx
mean	41.1441	25.2447	25.8493	17.3715
sem	1.43289	0.603479	0.859954	0.460352
