# Supplementary material for: Light reintroduction after dark exposure reactivates plasticity in adults via perisynaptic activation of MMP-9
Source: eLife. 2017 Sep 6;6:e27345. doi: 10.7554/eLife.27345 (PMC5630258; doi:10.7554/eLife.27345)
Supplement: Figure 2—figure supplement 1—source data 1. [file elife-27345-fig2-figsupp1-data1.xlsx]

## Sheet: Fig1-Sup 1A
V1b	Con	DE	LRx
	93.2518	94.0251	149.944
	86.3865	84.6905	128.782
	86.9642	51.2185	140.464
	118.362	59.7749	115.369
	115.036	47.0256	94.0816
	102.679	48.8922	101.051
	125.36	36.8169	89.5616
	90.3675	82.0196	100.936
	81.5929	73.4028
mean	100	64.2074	115.024

## Sheet: Fig1-Sup 1B
mPFC	Con	DE	LRx
	43.0249	92.2209	76.5711
	74.8053	20.8042	53.8151
	82.5026	39.7919	41.0532
	59.1104	102.761	99.0677
	140.654	52.1367	228.06
	125.287	119.089	46.8384
	121.96	211.052	195.669
	171.057	122.331	54.9563
	81.5988	86.4371
mean	100	94.0693	99.5038
