# Supplementary material for: Light reintroduction after dark exposure reactivates plasticity in adults via perisynaptic activation of MMP-9
Source: eLife. 2017 Sep 6;6:e27345. doi: 10.7554/eLife.27345 (PMC5630258; doi:10.7554/eLife.27345)
Supplement: Figure 2—source data 1. [file elife-27345-fig2-data1.xlsx]

## Sheet: 2
Aggrecan	On PV					WFA	On PV
	Sal		MMP9i				Sal		MMP9i
	Con	LRx	Con	LRx			Con	LRx	Con	LRx
mean	105.987	56.6797	100.759	111.715		mean	66.3474	39.6327	70.5172	79.9258
sem	4.5131	5.27109	6.95858	6.22799		sem	5.20719	3.03971	5.74098	5.1698
	Off PV						Off PV
	Sal		MMP9i				Sal		MMP9i
	Con	LRx	Con	LRx			Con	LRx	Con	LRx
mean	53.5575	35.1461	59.3269	53.0923		mean	26.4514	15.8692	24.2851	25.2133
sem	1.35331	1.53239	3.22023	1.23588		sem	1.45344	0.435356	0.748827	1.13857
