# Supplementary material for: Light reintroduction after dark exposure reactivates plasticity in adults via perisynaptic activation of MMP-9
Source: eLife. 2017 Sep 6;6:e27345. doi: 10.7554/eLife.27345 (PMC5630258; doi:10.7554/eLife.27345)
Supplement: Figure 3—source data 1. [file elife-27345-fig3-data1.xlsx]

## Sheet: 3A
	Intensity				Density				Size
	Con (6)	DE (6)	LRx (7)		Con (6)	DE (6)	LRx (7)		Con (6)	DE (6)	LRx (7)
	24.4064	28.2341	35.9498		18.675	12.0838	41.7442		1.19456	0.989675	1.58695
	30.4807	16.0463	21.4362		9.88678	6.59118	29.6603		1.15983	1.05913	1.11816
	25.8402	21.5051	46.2882		10.9853	13.1824	42.8427		1.10427	1.09403	1.26013
	25.5165	18.7642	30.3177		37.35	8.78825	45.0398		1.33693	0.99885	1.40005
	21.4762	16.4593	51.3186		10.9853	13.1824	37.35		1.38555	1.12716	1.43481
	19.8302	13.3678	38.1418		16.478	16.478	41.7442		1.19456	1.15871	1.32449
			29.7899				53.828				1.45117
mean	24.5917	19.0628	36.1774		17.3934	11.7177	41.7442		1.22928	1.07126	1.36797

## Sheet: 3B
VG1	Con (6)	DE (6)	LRx (7)		VG2	Con (5)	DE (5)	LRx (6)
	50.1126	56.5143	53.8593			24	12	75
	69.3694	63.3933	66.2906			25	12	81.6783
	79.4987	74.0161	74.6075			35	14	35
	65.9571	72.9546	77.0821			33	22.4327	85
	57.8252	57.9021	62.4683			50	21.9411	80
	44.6151	60.6878	61.5576					34.9064
			70.675		mean	33.4	16.4748	65.2641
mean	61.2297	64.2447	66.6486

## Sheet: 3C
	PV+		PV-
	Con	LRx	Con	LRx
	12.52	64.6429	9.76606	30.989
	24.6975	63.7903	6.12896	39.852
	51.5042	59.854	35.2257	35.1251
	13.0271	71.1727	9.15987	50.4876
mean	25.4372	64.865	15.0702	39.1134
