# Supplementary material for: Light reintroduction after dark exposure reactivates plasticity in adults via perisynaptic activation of MMP-9
Source: eLife. 2017 Sep 6;6:e27345. doi: 10.7554/eLife.27345 (PMC5630258; doi:10.7554/eLife.27345)
Supplement: Figure 4—source data 1. [file elife-27345-fig4-data1.xlsx]

## Sheet: 4G
WFA	micron	Con mean	DE mean	LRx mean	Con sem	DE sem	LRx mean		PV	micron	Con mean	DE mean	LRx mean	Con sem	DE sem	LRx mean
	0	53.4609	50.5538	41.5548	8.07663	11.029	5.73127			0	31.9378	21.0957	27.4985	2.40856	4.03528	5.81158
	1.3824	54.6211	51.1376	42.441	8.41052	11.0697	5.56239			1.3824	31.1498	20.6812	27.6085	2.19977	3.64654	6.0521
	2.7648	55.2993	52.1774	43.9166	8.40536	11.2451	5.59655			2.7648	30.1903	20.5228	27.5871	1.83704	3.20374	5.97848
	4.1473	56.5398	52.5289	44.8103	8.50595	11.1649	5.67466			4.1473	29.0718	20.7836	27.0976	1.88193	2.59335	5.61103
	5.5297	57.0574	53.9042	45.3899	8.6603	11.1718	5.63424			5.5297	28.2078	21.0678	26.2676	2.04945	2.02334	5.3994
	6.9121	56.8128	54.2431	45.8009	7.96875	11.036	5.76349			6.9121	27.323	21.1092	24.9072	2.07752	1.6546	4.84469
	8.2945	57.277	55.66	47.2945	8.33562	10.758	5.48982			8.2945	25.961	20.765	23.4777	1.92076	1.35574	3.87068
	9.677	56.9809	56.668	48.6945	8.11808	11.1037	5.58744			9.677	25.5346	20.798	23.2282	1.98195	1.29427	3.44479
	11.0594	57.4593	56.3289	48.5867	7.93295	10.6137	5.64942			11.0594	25.4123	20.789	23.5631	1.93176	1.24172	3.66579
	12.4418	58.0053	56.9557	48.8872	8.20828	10.3992	5.72319			12.4418	24.8414	21.2583	23.64	2.14029	1.21744	4.12294
	13.8242	58.2225	57.3247	50.1248	8.02299	10.0035	5.65606			13.8242	23.5549	21.6077	23.2207	2.26325	0.929968	4.01661
	15.2066	58.2899	57.2284	49.9448	7.81591	9.94484	5.28808			15.2066	23.1055	21.4852	22.7313	2.5426	0.811355	3.57034
	16.5891	57.7755	58.03	49.746	7.92572	9.37232	5.2925			16.5891	23.014	21.7786	22.6861	2.35967	0.965161	3.05407
	17.9715	57.974	58.1676	50.8808	7.77695	8.97512	4.94724			17.9715	22.3632	22.4223	23.4274	2.27508	1.82556	2.93827
	19.3539	57.6852	59.223	51.3527	7.74061	8.84028	4.84188			19.3539	22.712	23.4373	24.9712	2.3359	2.93447	3.26972
	20.7363	57.5718	60.1236	52.1259	7.54793	8.03204	4.96719			20.7363	22.4064	23.8317	26.2322	2.15709	3.65999	4.20088
	22.1188	56.4132	60.5291	52.2367	7.16615	7.86857	4.60196			22.1188	22.3176	24.1559	27.9278	2.05658	4.32878	5.77224
	23.5012	56.1467	60.7487	52.5333	6.96963	7.3431	4.43717			23.5012	22.0128	24.1585	28.6231	2.18802	4.34453	6.98993
	24.8836	56.8062	61.1702	53.3651	7.26903	7.08469	4.2553			24.8836	22.1689	23.6438	27.3879	2.13397	3.99211	6.20506
	26.266	56.2327	61.224	53.169	6.85403	6.59061	4.3044			26.266	22.0528	23.268	25.1127	2.21272	3.84424	4.28143
	27.6484	55.965	61.736	53.6682	7.13911	7.12828	4.30623			27.6484	21.7172	22.9631	23.3169	2.32251	3.60774	3.11101
	29.0309	56.1966	61.2653	53.9911	6.84989	6.28285	4.33279			29.0309	21.1819	22.568	22.5906	2.30076	3.33047	2.60731
	30.4133	55.9703	60.3162	53.4348	6.6627	6.18859	4.40861			30.4133	21.0637	21.7494	21.9708	2.14841	2.67163	2.46796
	31.7957	55.6947	60.8591	53.1741	6.54502	6.42306	4.29941			31.7957	21.2482	21.1412	21.3954	2.37164	1.9557	2.38131
	33.1781	56.0022	60.8723	53.2962	6.14243	6.0665	4.38519			33.1781	21.2312	20.858	21.2633	2.37381	1.52471	2.22765
	34.5606	56.5521	60.0069	53.8567	6.40595	5.99199	3.98361			34.5606	21.0422	20.7207	21.324	2.24538	1.42897	2.27288
	35.943	56.096	60.0978	53.3624	5.96422	6.01009	4.0605			35.943	21.4435	20.5334	21.2007	2.33654	1.38107	2.32189
	37.3254	56.8462	59.7611	53.2105	5.92441	5.64757	4.19726			37.3254	21.5181	21.0361	21.2647	2.36544	1.56221	2.25938
	38.7078	55.9591	60.0633	54.0257	6.02135	5.28964	4.05421			38.7078	21.4793	21.0143	21.1237	2.44778	1.52904	2.20774
	40.0902	55.9939	59.9746	54.3782	5.35505	5.24707	4.29344			40.0902	21.7559	21.4073	21.0766	2.44421	1.52758	2.14504
	41.4727	55.8194	60.2552	55.0279	5.4716	5.18218	4.50073			41.4727	22.1423	21.8497	21.2066	2.40127	1.52408	2.11828
	42.8551	55.3515	60.3361	54.3026	5.38745	5.07529	4.45256			42.8551	22.3131	22.2966	21.4453	2.50497	1.78721	2.00589
	44.2375	55.4428	59.9522	53.2189	5.18961	4.93681	4.03073			44.2375	22.4764	22.2742	21.352	2.41527	1.94489	1.9546
	45.6199	55.4366	60.0995	52.8066	5.28222	4.93168	4.06473			45.6199	22.1772	21.4978	21.2987	2.42821	1.25512	1.8408
	47.0024	55.0056	59.4908	53.4211	5.43717	5.24263	4.28121			47.0024	22.2551	21.2227	21.5891	2.55177	0.884298	1.85519
	48.3848	54.0877	59.4489	53.5757	5.15618	4.37454	4.39983			48.3848	22.619	21.2744	21.9567	2.49747	0.883971	1.94416
	49.7672	54.6649	58.535	53.6609	5.03332	4.19764	4.48451			49.7672	22.9162	21.4042	21.9091	2.47415	0.824977	1.95377
	51.1496	55.5386	59.6129	53.6529	5.36648	4.54591	4.00461			51.1496	23.1712	21.5454	21.7002	2.47588	0.715402	1.88082
	52.532	54.0333	58.88	52.6111	5.10497	4.15593	4.28831			52.532	23.4467	21.1921	21.5194	2.4067	0.501124	1.85516
	53.9145	54.9899	58.1543	53.0841	5.08039	3.75077	4.38266			53.9145	23.7216	21.3962	21.5772	2.52165	0.596407	1.92465
	55.2969	55.3336	59.2766	52.9462	4.98368	3.9824	4.13157			55.2969	24.2996	21.2271	21.6894	2.6431	0.537967	1.92377
	56.6793	54.4425	59.215	52.321	5.17701	3.64508	4.2134			56.6793	24.3897	21.327	22.16	2.75624	0.609853	1.99743
	58.0617	54.3634	59.429	52.0152	5.14117	3.96945	3.98188			58.0617	24.6175	21.6098	22.3753	2.76938	0.682011	1.91074
	59.4442	55.0192	59.2782	52.766	4.76621	3.89623	4.13435			59.4442	24.8202	21.725	22.4927	2.69776	0.621216	1.90193
	60.8266	54.7147	58.2381	52.8725	4.20728	4.01082	4.10707			60.8266	24.9534	21.9837	22.4787	2.77264	0.617459	1.91145
	62.209	54.3521	58.3753	52.4827	4.27894	3.66751	4.13336			62.209	25.1093	22.2042	22.764	2.6547	0.587375	1.97731
	63.5914	54.659	58.0153	52.6904	4.46458	3.47142	3.68307			63.5914	25.3751	22.7374	22.8907	2.56111	0.667719	1.99571
	64.9738	55.3118	58.1229	52.4554	3.89594	2.91777	3.65868			64.9738	25.5597	23.1427	23.1377	2.55603	0.720304	1.87413
	66.3563	55.2209	58.2872	52.6022	3.94797	3.34289	4.00717			66.3563	25.4566	23.1859	23.2078	2.49159	0.876864	1.7805
	67.7387	54.9673	57.0376	52.5572	3.93673	3.51189	3.73261			67.7387	25.8615	23.4298	23.3969	2.59225	0.727913	1.81887
	69.1211	55.7438	57.3205	52.2592	3.78998	3.24767	3.77535			69.1211	26.0281	23.8524	23.73	2.54925	0.79592	1.87936
	70.5035	54.6446	57.679	52.9854	4.38345	3.0599	3.64615			70.5035	25.8627	24.0019	24.07	2.5021	0.740193	1.71727
	71.886	54.5994	57.9681	52.4833	4.18726	2.7323	3.72669			71.886	25.6138	24.3676	24.4528	2.5753	0.746786	1.81666
	73.2684	54.1973	57.0968	52.8424	3.54573	2.72248	3.65882			73.2684	25.7789	24.5479	24.8925	2.21159	0.725363	1.91439
	74.6508	54.0915	57.4133	52.3197	3.78193	2.75601	3.6519			74.6508	25.8246	24.8192	24.9687	2.1823	0.683344	1.8869
	76.0332	55.0841	57.0514	52.5153	3.75074	2.98928	3.63243			76.0332	26.1677	25.1796	25.0901	2.13493	0.654896	1.76454
	77.4156	54.3167	57.6045	52.5474	3.75783	2.95919	3.75361			77.4156	26.0174	25.2218	25.2959	2.28173	0.63642	1.79619
	78.7981	54.3489	57.2267	52.4256	3.9581	2.70411	3.81961			78.7981	25.8029	25.6282	25.5968	2.37313	0.631653	1.79324
	80.1805	54.8667	57.018	53.2844	3.86565	2.55604	3.5587			80.1805	26.0522	25.6636	25.6271	2.47411	0.518029	1.67461
	81.5629	54.636	57.1771	53.0092	3.34052	2.75269	3.44234			81.5629	26.4658	25.8087	25.7919	2.45921	0.396867	1.6291
	82.9453	54.2912	56.2919	52.2007	3.48143	2.55362	3.82854			82.9453	26.7051	25.7729	26.3433	2.40956	0.434218	1.6277
	84.3278	54.6071	55.8537	53.9693	3.59234	2.64957	4.17871			84.3278	26.7014	25.4999	26.6871	2.28781	0.30336	1.66364
	85.7102	54.6604	56.5179	53.4617	3.69547	2.92008	4.31174			85.7102	27.0056	25.7603	26.8524	2.3562	0.373409	1.76953
	87.0926	55.0984	56.0219	52.7541	3.41538	2.67648	4.05077			87.0926	27.5932	26.0721	26.8547	2.49548	0.455424	1.7399
	88.475	55.67	55.688	52.8533	3.42216	2.28324	3.99704			88.475	28.3777	26.4942	27.4455	2.33263	0.536563	1.72137
	89.8574	55.758	56.112	52.7408	3.4456	2.16228	3.72021			89.8574	28.7894	26.9292	27.8376	2.34568	0.660366	1.83256
	91.2399	54.6826	56.921	52.3333	3.53617	2.44225	3.56585			91.2399	29.5536	27.4026	27.8648	2.26787	0.752192	1.74147
	92.6223	54.9223	56.8851	52.6426	3.27658	2.56737	3.65773			92.6223	29.347	27.812	27.9123	2.09054	0.810031	1.60973
	94.0047	55.9382	56.5784	52.7661	3.20555	2.43098	3.62366			94.0047	28.9878	27.8423	28.3404	2.1334	0.746768	1.6079
	95.3871	55.7849	56.3687	52.7403	3.31011	2.4168	3.65564			95.3871	28.8616	28.1773	28.5888	2.33252	0.696298	1.5791
	96.7696	55.0822	56.6823	52.7293	3.50338	2.78855	3.53627			96.7696	28.87	28.2048	28.5996	2.47532	0.660608	1.52012
	98.152	54.8734	56.3021	52.5597	3.31584	2.70005	3.42937			98.152	28.0799	28.162	28.9129	2.42247	0.684172	1.58383
	99.5344	54.7749	56.5659	52.6916	3.19823	2.50663	3.50477			99.5344	28.2283	28.5496	29.2357	2.42636	0.701716	1.74306
	100.917	56.6174	56.8176	52.6502	3.3634	2.16201	3.61188			100.917	28.5858	28.6573	29.4824	2.61853	0.76206	1.87562
	102.299	56.1816	56.785	52.5854	3.45033	2.38049	4.00299			102.299	28.4512	28.5049	29.7343	2.88127	0.756226	1.91041
	103.682	55.712	56.9398	53.8024	3.48726	2.36248	4.05574			103.682	28.8081	28.6426	30.4041	3.03909	0.827994	1.94577
	105.064	56.2535	56.1437	53.6086	3.11917	1.95698	4.20745			105.064	29.1298	28.9249	30.5279	2.86116	0.98157	1.84041
	106.447	55.9176	56.7619	53.5037	3.10165	1.63565	4.19983			106.447	29.7947	29.1716	30.2718	2.91277	1.01079	1.70756
	107.829	55.8551	57.0534	53.3875	3.05447	2.03954	3.90827			107.829	30.5728	29.4946	30.3772	2.94748	1.04251	1.60247
	109.211	56.3037	57.1814	54.0863	3.36383	2.37042	3.78777			109.211	30.3438	29.5456	30.2074	2.62271	1.00964	1.70457
	110.594	56.2228	57.3538	54.31	3.74491	2.5398	4.04855			110.594	30.9639	29.9673	30.306	2.78568	1.00447	1.90343
	111.976	56.4444	57.1747	54.314	3.1353	2.21728	3.85832			111.976	30.9499	30.4138	30.6028	2.69383	1.16114	2.02346
	113.359	56.4388	56.6725	54.5545	3.10053	2.12162	3.9081			113.359	30.7865	30.957	30.7361	2.80811	1.27274	2.14406
	114.741	56.8896	56.9256	55.4021	3.44016	2.15151	4.05361			114.741	30.7912	31.0659	30.7273	2.78399	1.32141	2.11093
	116.124	56.9481	56.7105	55.3911	3.59035	2.38139	4.18655			116.124	30.455	31.0441	30.645	2.83025	1.31701	2.1375
	117.506	56.6547	57.5881	55.5536	3.34261	2.52819	4.07173			117.506	30.3032	31.2138	30.4635	2.6121	1.26464	2.02848
	118.888	56.9179	57.7073	55.1247	3.42555	2.32481	3.83198			118.888	30.7806	31.667	30.4914	2.93582	1.36576	1.91557
	120.271	56.0945	57.7163	54.0421	3.31139	2.43146	3.96094			120.271	31.0237	31.7109	30.6401	3.12192	1.44399	1.96963
	121.653	56.6947	57.8736	54.8734	3.87677	2.57471	4.139			121.653	30.7033	31.863	30.8675	2.84206	1.50139	2.15632
	123.036	57.1856	56.7632	55.1068	3.6021	2.59387	3.95142			123.036	31.0962	32.1755	30.9714	2.67247	1.50552	2.22271
	124.418	57.3133	57.0415	54.6781	3.58025	2.53693	3.95196			124.418	30.9501	32.4244	31.4546	2.66319	1.47407	2.21084
	125.8	56.9702	57.6244	55.3677	3.49036	2.52936	4.2139			125.8	30.8767	32.5925	31.6342	2.62839	1.49791	2.03412
	127.183	56.513	58.2983	56.0147	3.37284	2.38624	4.33369			127.183	31.2342	32.4705	31.9026	2.71343	1.45993	1.95941
	128.565	56.1416	58.7491	56.1602	3.27845	2.53161	4.06643			128.565	31.7197	32.2137	32.1278	2.83621	1.37668	1.94874
	129.948	57.2404	57.6795	55.3826	3.16783	2.49629	4.30069			129.948	31.7805	32.1866	32.0056	2.9969	1.34435	1.79996
	131.33	57.827	57.5823	55.5439	3.42225	2.26954	4.4141			131.33	32.0412	31.8503	32.0561	2.8399	1.30542	1.84996
	132.713	57.0445	57.1575	55.3173	3.33151	2.35692	4.34155			132.713	31.7511	31.8964	31.8663	2.73929	1.30455	2.00126
	134.095	57.1081	56.938	55.0007	3.22697	2.40572	4.05872			134.095	32.2136	32.3392	31.2768	2.62623	1.42182	2.0078
	135.477	56.4375	57.7175	55.3039	2.9644	2.46761	4.15566			135.477	32.146	32.4938	31.3862	2.78966	1.43683	2.01737
	136.86	56.8825	57.7826	54.7879	3.51956	2.4306	4.47935			136.86	32.2161	32.4968	31.6555	2.9391	1.50982	2.06494
	138.242	57.9729	57.6077	55.0959	3.71793	2.65818	4.25129			138.242	32.4416	32.9158	31.8318	2.63053	1.6872	2.13744
	139.625	57.8525	58.029	55.2478	3.59454	2.81925	4.68194			139.625	32.7755	33.5755	32.1199	2.48394	1.76515	2.13383
	141.007	58.2728	57.6136	55.5394	3.89562	2.76089	4.84743			141.007	32.8986	33.4416	32.4179	2.92624	1.7851	2.05545
	142.389	58.5586	57.7682	55.3463	3.48392	2.37817	4.69128			142.389	32.4416	33.3822	32.4195	2.8657	1.75711	2.01367
	143.772	59.4783	58.5347	55.7825	3.72346	2.60966	5.01223			143.772	32.22	33.37	32.6226	2.69941	1.75896	2.13252
	145.154	58.2268	58.2064	55.94	3.73563	2.45454	5.28583			145.154	32.6015	33.052	32.3692	2.6432	1.74243	2.29427
	146.537	57.3226	57.7369	55.7978	3.24161	2.59384	4.74251			146.537	32.8369	33.1631	32.6575	2.56773	1.71491	2.36757
	147.919	58.0665	59.3201	55.8967	3.45139	2.52962	4.35063			147.919	32.5957	33.3751	32.7237	2.58313	1.60937	2.2219
	149.302	57.391	59.2609	56.0058	3.50301	2.60959	4.37414			149.302	32.5295	33.2682	32.5674	2.73434	1.45803	2.24051
	150.684	58.8944	59.0533	56.0438	3.92089	2.67096	4.61009			150.684	32.68	33.4627	32.5242	2.75729	1.54696	2.24525
	152.066	58.4786	60.0849	56.387	3.49457	2.89726	4.63962			152.066	32.9362	33.7034	32.7582	2.38579	1.49531	2.24348
	153.449	58.8919	59.3837	55.8216	3.44135	2.63186	4.50094			153.449	32.834	33.7765	32.5041	2.37476	1.41026	2.24796
	154.831	60.1476	58.9262	55.2256	3.39511	2.64093	4.65403			154.831	33.934	33.5847	32.373	2.44442	1.34352	2.2888
	156.214	59.5665	59.7121	56.6341	3.61529	2.62599	4.80717			156.214	34.412	33.3751	32.8788	2.86111	1.17986	2.25679
	157.596	60.2309	59.6743	56.5955	3.78867	2.54847	4.88392			157.596	34.6296	33.1368	33.0047	2.85866	1.06206	2.25291
	158.979	59.5888	59.9177	55.9656	3.80717	2.74551	4.81554			158.979	34.4022	33.6705	33.1037	2.71063	1.11114	2.27417
	160.361	58.9367	60.7588	56.2939	3.8826	3.09812	4.84323			160.361	34.5022	33.5601	33.1915	2.52815	1.2578	2.28709
	161.743	59.8829	60.9646	56.34	3.61285	2.73911	4.61551			161.743	34.5563	34.0191	33.2349	2.76196	1.42854	2.07888
	163.126	60.2779	61.1845	56.8248	3.55122	2.82643	4.5619			163.126	34.3264	34.118	33.4405	2.98563	1.59298	1.90251
	164.508	59.7465	60.4149	56.9623	3.52113	2.80957	4.637			164.508	34.3217	34.0051	34.2066	2.93953	1.59758	1.82708
	165.891	60.1902	60.9881	57.1166	3.25379	2.72202	4.83974			165.891	34.121	33.9254	34.7542	2.8346	1.61043	2.01532
	167.273	59.6404	60.891	56.7077	3.53917	3.13929	4.98592			167.273	33.3281	33.8456	34.8294	2.69076	1.64453	2.05111
	168.655	59.5019	61.4414	56.2617	3.1723	3.0341	4.68979			168.655	33.2918	33.675	34.7282	2.41383	1.57948	1.86829
	170.038	60.3747	61.1852	56.9913	3.28104	2.72825	4.59788			170.038	33.8511	34.1452	34.6926	2.62539	1.62462	1.78334
	171.42	59.9993	61.4305	56.9585	3.59764	3.00665	4.708			171.42	34.003	34.4234	34.5342	2.78985	1.6783	1.89848
	172.803	61.4349	60.6333	58.0338	3.70473	2.66711	4.60957			172.803	34.0493	34.6826	34.8177	2.92872	1.65439	1.94578
	174.185	61.6299	61.1497	58.328	3.82152	2.84216	4.69258			174.185	33.6886	35.1509	35.0681	2.68412	1.73635	1.90378
	175.568	61.6414	60.8965	57.0596	3.68108	3.01567	4.596			175.568	33.5805	35.445	34.9166	2.59574	1.72173	1.79127
	176.95	61.2025	62.1655	57.0608	3.68589	2.70574	4.3375			176.95	33.8585	35.3946	34.9832	2.83958	1.77104	1.66037
	178.333	61.4864	62.7294	57.3194	3.7195	2.75659	4.63737			178.333	34.3119	35.7852	34.9646	2.8225	1.92287	1.67911
	179.715	63.1365	62.1776	57.8639	3.68534	2.72799	4.97958			179.715	34.6697	35.5656	35.1102	2.82473	1.88159	1.64683
	181.097	62.3545	62.0012	58.8251	3.89997	2.52003	4.53738			181.097	35.1608	35.4532	34.656	2.88932	1.74766	1.61986
	182.48	62.5338	62.6542	58.1578	3.70374	2.83851	4.96025			182.48	35.3619	35.1169	34.8119	2.84091	1.65525	1.6838
	183.862	62.6188	62.2852	58.9056	3.69892	2.68077	5.4367			183.862	35.5674	35.2263	35.2435	2.86308	1.66833	1.73684
	185.245	62.7455	62.5744	59.4963	3.52682	2.96435	5.18465			185.245	35.9897	35.1652	35.3082	2.74962	1.7687	1.70862
	186.627	63.136	62.5771	58.6171	3.80283	2.48998	4.94154			186.627	36.0878	35.7817	35.2456	2.63512	1.94479	1.81659
	188.009	63.5813	62.4362	58.4623	3.91451	2.59476	4.99598			188.009	36.2704	35.8646	35.5153	2.67507	1.93729	1.89982
	189.392	63.9569	62.3707	59.6869	3.73878	2.22932	5.49177			189.392	36.2752	36.0253	35.941	2.64766	1.93293	1.95247
	190.774	63.918	63.0602	60.9129	4.09699	2.83494	5.71568			190.774	36.4635	36.275	36.2975	2.51254	1.89837	1.92173
	192.157	62.5112	63.0672	60.3468	3.56669	2.52224	5.2558			192.157	36.3606	36.2317	36.4423	2.80897	1.78816	1.71706
	193.539	63.6417	63.5149	60.7554	3.62951	2.38248	5.02039			193.539	35.7917	36.657	36.5417	2.77524	1.86331	1.69808
	194.922	63.4804	62.984	59.8061	4.13313	2.58593	5.49485			194.922	36.3047	36.3564	36.2937	2.85136	1.78904	1.7825
	196.304	63.4571	63.6628	60.2312	3.85612	2.68057	5.56477			196.304	36.4971	36.3562	36.3824	2.83644	1.74871	1.7487
	197.686	64.8764	64.3178	59.7009	3.84923	2.65068	5.73223			197.686	36.3697	36.6659	36.2776	2.55024	1.87213	1.76908
	199.069	65.1766	64.5469	59.9901	4.25854	2.66608	5.43657			199.069	36.3632	36.9066	36.1445	2.58089	1.77232	1.87143
	200.451	65.7835	65.4813	59.7006	4.08453	2.78132	5.2538			200.451	35.9733	37.2806	36.0556	2.4758	1.87396	1.86918
	201.834	66.3354	65.6299	60.4889	4.45478	2.80611	5.58893			201.834	36.2324	37.1812	36.2204	2.52818	2.00517	1.81513
	203.216	65.8755	65.1548	61.5485	4.86428	2.86232	5.65505			203.216	36.9745	36.8663	36.2386	2.5956	2.03755	1.75482
	204.599	65.4757	65.0713	61.0862	4.25687	2.57092	5.41484			204.599	37.0009	36.6983	36.1724	2.71095	2.02817	1.78734
	205.981	65.8345	65.6368	61.397	4.4424	2.37576	5.21124			205.981	36.4396	36.6193	36.191	2.70699	1.98227	1.59071
	207.363	65.5477	66.2256	61.3223	4.55558	2.78531	5.02021			207.363	36.0205	36.5509	36.1349	2.58934	1.90213	1.46708
	208.746	65.5869	66.5818	61.5606	4.81943	2.87672	5.36229			208.746	36.3803	36.576	36.6617	2.70587	1.83005	1.67651
	210.128	66.464	66.8103	62.3995	4.79314	2.52493	5.48877			210.128	36.073	36.7197	37.104	2.63489	1.83442	1.71612
	211.511	66.2792	65.7954	63.0035	4.24821	2.40844	5.26813			211.511	35.5431	37.2059	37.3805	2.70899	1.88894	1.56144
	212.893	67.0925	66.8842	62.732	4.52234	2.61907	5.12489			212.893	35.7363	37.1542	37.5163	2.94307	1.84758	1.47025
	214.275	67.3745	66.53	62.4752	4.3087	3.19188	5.48856			214.275	36.1226	37.4603	37.6758	2.85217	1.74037	1.63415
	215.658	67.3103	67.1745	62.9449	3.98995	2.89274	5.28883			215.658	36.913	37.877	37.8833	2.7134	1.87057	1.80973
	217.04	66.823	67.9273	62.7903	4.04596	2.76017	5.19516			217.04	37.6855	37.6603	37.9627	2.57888	1.8871	1.87198
	218.423	66.8781	67.7575	62.8935	4.15033	2.59017	5.46384			218.423	38.051	37.8402	37.739	2.67958	1.70564	1.78308
	219.805	68.3299	66.9869	63.4483	4.07007	2.69398	5.5737			219.805	38.0536	37.3865	37.7547	2.80989	1.5689	1.88726
	221.188	68.2474	67.7068	63.5196	3.96298	2.6725	5.36087			221.188	38.1616	37.5735	37.57	2.74015	1.61806	2.01407
	222.57	68.2709	68.1477	63.9892	4.07662	2.88956	5.436			222.57	37.9996	37.9296	37.4002	2.90508	1.48454	1.88158
	223.952	68.4156	68.4074	64.2211	3.44257	2.5275	5.25402			223.952	37.7908	37.3789	37.1835	2.93879	1.36582	1.69906
	225.335	68.295	68.2055	64.8473	3.9678	2.51541	5.2119			225.335	38.1278	37.4306	36.6658	2.85481	1.36018	1.62424
	226.717	68.8542	67.962	64.6411	4.08002	2.45102	5.87682			226.717	37.7023	37.2533	36.8169	2.64378	1.31944	1.53445
	228.1	67.7432	69.4576	65.06	4.04267	2.86173	6.01601			228.1	37.4517	37.4095	36.5171	2.71218	1.29975	1.58712
	229.482	66.7611	70.081	64.7975	3.76836	3.12342	5.8432			229.482	37.0607	37.2519	36.5103	2.66276	1.36071	1.6096
	230.864	67.9454	70.3726	64.8548	3.73647	2.96047	5.66634			230.864	37.0057	37.3192	36.9401	2.75357	1.32786	1.85077
	232.247	68.4639	70.6721	65.4886	3.44694	2.99579	5.74538			232.247	36.7726	37.641	37.6531	2.6233	1.3332	2.10758
	233.629	68.9344	70.5903	66.4688	3.26448	2.98447	5.96109			233.629	36.6876	37.3968	37.7349	2.71741	1.36259	2.11137
	235.012	69.0135	70.184	66.9292	3.62717	3.09582	5.93146			235.012	36.8268	37.4955	37.6697	2.78394	1.29087	2.05717
	236.394	70.3502	70.282	66.7595	3.78117	3.08811	5.69683			236.394	36.81	37.3312	37.4721	2.9007	1.26074	1.91812
	237.777	69.9222	70.2874	66.9564	3.80525	2.9708	5.80275			237.777	37.2913	37.2647	37.2914	3.03057	1.35635	2.00938
	239.159	70.2109	70.489	67.5762	3.99783	2.97923	5.73598			239.159	37.746	37.5688	37.5461	2.96852	1.4216	2.13354
	240.542	69.2843	70.8738	67.9703	4.00963	2.53696	5.66721			240.542	37.9984	38.2195	37.883	3.0479	1.53498	2.33604
	241.924	70.1546	71.0705	68.7965	4.16912	2.90008	5.80354			241.924	37.9146	38.6554	38.0754	2.90588	1.56715	2.49964
	243.306	71.8135	71.3342	68.4968	3.80115	3.00727	6.16018			243.306	38.3963	38.9795	38.4027	3.06559	1.68426	2.44706
	244.689	70.7212	71.5776	68.3018	3.39103	2.805	5.75242			244.689	38.6818	39.0927	38.3579	3.23668	1.52566	2.28678
	246.071	70.8505	71.8318	68.3272	3.73998	2.8995	5.45818			246.071	38.3562	39.4707	38.2921	3.11685	1.61014	2.12555
	247.454	71.2929	72.943	68.7977	3.96369	2.84648	5.37151			247.454	37.8376	39.5909	38.4058	3.00286	1.77926	2.092
	248.836	71.2167	72.581	68.5331	4.18799	2.77905	5.81872			248.836	37.6261	39.7318	38.3829	2.98742	1.86161	2.01927
	250.218	70.8395	72.5637	68.4765	4.75909	2.87381	5.69295			250.218	37.0428	39.6674	38.2039	2.59332	1.85688	2.01734
	251.601	71.495	72.4942	69.1152	4.20546	2.78065	5.64901			251.601	36.9111	39.3939	38.3639	2.50609	1.82373	2.08329
	252.983	72.2876	73.3894	69.722	4.86832	2.59392	5.09312			252.983	37.7009	39.191	38.1606	2.80549	1.70589	2.01882
	254.366	72.3625	73.1674	69.2702	5.02965	2.75417	5.08623			254.366	37.8452	38.8103	38.6059	2.53198	1.54741	1.91231
	255.748	72.6563	72.3367	70.0703	4.39514	2.81195	5.33612			255.748	37.7827	38.479	39.0438	2.21155	1.47985	1.80943
	257.13	71.4358	73.7232	70.2246	4.19767	2.52727	5.59428			257.13	37.4542	38.4299	39.1853	2.37114	1.57418	1.89762
	258.513	72.0036	73.5922	70.9209	4.36926	2.50721	5.7507			258.513	37.5231	38.7116	39.2418	2.20149	1.54351	1.98403
	259.895	73.6359	73.045	71.1824	4.71152	2.61086	5.56522			259.895	38.0881	38.6934	38.7812	2.38716	1.56568	1.96559
	261.278	73.1181	74.1949	70.6069	4.44192	2.55372	5.53555			261.278	38.172	38.9761	38.5404	2.29934	1.56469	1.81824
	262.66	72.3748	73.7037	71.4352	3.82693	1.76669	5.58639			262.66	37.9993	39.178	38.3389	2.15153	1.49796	1.77871
	264.043	73.4669	73.3471	71.5295	4.66214	1.93256	5.49456			264.043	38.3147	39.2832	38.3029	2.27911	1.37701	1.80514
	265.425	74.4145	73.0199	71.4261	4.23454	2.38293	5.77203			265.425	38.323	39.2114	38.6793	2.4213	1.43628	1.96941
	266.808	74.1949	73.5765	71.5621	4.20141	2.07719	6.16628			266.808	38.7798	38.9612	39.001	2.48216	1.48154	2.06517
	268.19	74.5956	74.2628	72.764	4.25357	1.96713	6.16692			268.19	39.4367	39.252	38.9544	2.26547	1.46651	2.08478
	269.572	74.1864	73.7821	72.6387	4.36856	1.9783	6.0436			269.572	38.8713	39.5018	39.2496	2.3816	1.48714	1.95074
	270.955	73.3834	74.7471	72.7852	3.85028	1.93231	5.58822			270.955	38.1712	39.5379	39.8583	2.5459	1.51145	1.96375
	272.337	73.6731	74.9361	73.1543	3.69893	2.50259	5.19706			272.337	38.51	39.4525	40.0764	2.44562	1.52633	2.104
	273.72	74.1699	74.2118	73.3611	3.76366	2.46556	5.33562			273.72	38.0134	39.4655	40.2071	2.06632	1.488	2.17173
	275.102	74.3635	75.7741	73.2545	4.06404	2.33607	5.87326			275.102	38.1302	39.5999	40.4822	2.20327	1.41528	2.14297
	276.484	74.8562	75.5363	73.969	3.987	1.9562	5.50462			276.484	38.6807	39.1589	40.9028	2.82437	1.32143	2.00721
	277.867	75.6537	75.2367	74.1405	3.96055	2.14564	5.50131			277.867	38.5538	39.198	40.7355	3.0259	1.33717	1.95762
	279.249	75.4876	76.2928	74.3104	4.26166	2.69182	5.62894			279.249	38.4495	39.607	40.5983	3.12941	1.50889	1.9224
	280.632	75.1731	75.7691	72.8135	3.8415	2.38328	5.36092			280.632	37.5738	39.2931	40.2477	2.96001	1.43897	1.81156
	282.014	73.6083	76.9464	72.8752	3.3162	2.67019	5.27904			282.014	37.2132	39.2059	39.8494	2.80328	1.40391	1.86567
	283.397	74.6508	75.9176	74.0597	3.6815	2.54176	5.43079			283.397	37.5512	39.5462	39.6883	2.61043	1.40842	2.04965
	284.779	75.1877	76.5272	73.8352	3.99642	2.29503	5.46144			284.779	37.2794	39.3888	39.9975	2.31401	1.41996	2.21475
	286.161	75.9672	76.6319	73.8815	4.01069	2.38456	5.21622			286.161	37.6853	39.1603	40.4016	2.24229	1.43518	2.30414
	287.544	76.0177	77.5381	73.8096	4.4013	2.74809	5.26958			287.544	38.4259	39.4385	39.9546	2.26911	1.46152	2.15983
	288.926	76.1415	77.3178	73.5248	4.82638	2.55953	5.27205			288.926	38.839	39.7882	39.5905	2.28779	1.461	2.00138
	290.309	76.2429	77.8468	73.5938	4.35567	2.67797	4.70333			290.309	39.4798	39.7741	39.595	2.38671	1.566	2.01168
	291.691	75.5406	79.089	74.0253	4.44099	2.79409	4.36152			291.691	39.6885	39.8419	39.5297	2.58161	1.48323	2.13165
	293.074	75.5776	79.0772	73.6196	4.84553	2.58483	4.51403			293.074	39.6734	39.9144	39.7283	2.52452	1.59524	2.29126
	294.456	76.4573	78.8316	73.852	4.8871	2.15777	4.56103			294.456	39.2904	39.9917	40.1126	2.28759	1.68744	2.31277
	295.838	74.587	77.8193	73.4091	4.30521	2.31775	4.71959			295.838	39.1475	39.695	40.0011	2.24453	1.84668	2.29153
	297.221	74.8549	77.0147	74.2114	4.25692	2.03527	4.06986			297.221	38.5762	39.1954	40.1757	2.44294	1.82176	2.35513
	298.603	75.5413	78.0748	74.9769	4.03283	2.68498	4.05105			298.603	38.3751	39.1531	40.593	2.47531	1.79274	1.96424
	299.986	75.7343	78.7013	75.7472	4.30795	2.83837	4.0214			299.986	37.8702	39.5854	40.7851	2.6184	1.83844	1.78704
	301.368	75.5589	79.0489	75.8398	4.16792	2.54451	3.99049			301.368	37.3965	39.8728	40.7778	2.62533	1.72374	1.79805
	302.75	74.9525	78.6263	76.4282	4.15108	2.83181	4.26671			302.75	37.1288	40.2438	40.7902	2.56064	1.7623	1.6428
	304.133	75.2884	79.3093	76.7052	4.15837	3.19336	4.18811			304.133	37.0909	40.3316	40.7861	2.48478	1.84496	1.60706
	305.515	75.2065	79.9001	76.8544	3.91874	2.98181	4.39125			305.515	37.4408	40.8361	40.9519	2.70534	2.04894	1.67207
	306.898	74.1224	80.4434	76.5519	3.98941	2.39277	4.51824			306.898	37.4467	41.2747	41.6361	2.80555	2.18442	1.63559
	308.28	75.7112	80.9911	77.8972	4.12416	2.39987	4.76621			308.28	37.5607	41.5357	42.3182	2.5353	2.21811	1.91486
	309.663	75.7001	80.9042	77.8941	4.67282	2.68768	4.88715			309.663	37.6336	41.519	42.6743	2.4261	2.23016	2.15939
	311.045	74.678	79.911	77.8448	4.81155	2.49132	5.0969			311.045	37.3026	41.5378	42.4609	2.6676	2.2335	2.50032
	312.427	75.3843	80.056	76.9518	4.72382	2.18324	4.78328			312.427	37.4629	41.449	42.4011	2.78954	2.14673	2.73902
	313.81	75.915	80.1317	76.6667	4.36788	2.42407	4.66461			313.81	37.2956	41.7423	42.362	3.00931	1.99891	2.57808
	315.192	75.7375	80.9423	77.9155	4.08216	2.69205	4.78329			315.192	37.485	41.9965	42.7164	3.29121	1.92502	2.63323
	316.575	75.3426	80.1493	78.4236	4.21798	2.92693	4.67822			316.575	37.6151	41.72	42.5703	3.22699	1.92627	2.48192
	317.957	75.522	79.7971	78.6061	4.10314	3.07968	4.49176			317.957	36.6237	41.2411	41.9934	2.74777	1.91188	2.12578
	319.339	76.326	79.1849	77.4932	4.05757	2.74582	4.54337			319.339	36.3901	40.8563	41.391	2.36966	1.98065	1.97204
	320.722	75.6091	79.9256	77.5266	3.83011	2.7642	4.18459			320.722	36.3432	40.6179	41.004	2.12971	2.13948	1.96301
	322.104	75.7118	80.2724	77.1019	3.8912	2.76212	4.14812			322.104	36.3447	40.6336	41.0412	2.17245	2.40332	1.97979
	323.487	76.3968	79.2855	77.4543	4.06222	2.83525	4.3632			323.487	36.5429	40.0302	41.3342	2.36109	2.50238	1.87384
	324.869	75.5721	79.1211	77.3471	3.78271	2.8635	4.10588			324.869	36.699	39.5675	41.4606	2.05344	2.17998	1.85605
	326.252	75.0811	79.3912	76.5578	4.21008	3.12249	4.38646			326.252	37.1267	39.5273	41.5255	1.92323	2.15009	1.73958
	327.634	75.5137	79.2523	77.8297	5.22971	3.32166	4.43137			327.634	37.4339	40.1524	41.8157	1.82792	2.21718	1.61963
	329.017	74.8356	77.7699	77.4762	4.96846	3.78943	4.41785			329.017	37.5699	40.5606	42.3774	1.97213	2.24815	1.7442
	330.399	75.5788	79.737	77.3157	5.18652	3.38798	4.2635			330.399	37.9128	40.7502	42.1116	1.75242	2.38029	1.77318
	331.781	74.8239	77.8429	77.8118	4.90074	3.23681	4.0453			331.781	37.7913	40.9369	41.9387	1.52318	2.53723	1.86319
	333.164	74.7629	78.6443	77.1708	4.79673	3.82789	4.02307			333.164	37.8543	40.5012	42.1591	1.47376	2.5236	1.9932
	334.546	73.1282	78.7828	76.9686	4.34606	3.38442	4.00287			334.546	37.8064	40.4111	42.5216	1.59182	2.49167	2.10144
	335.929	73.8886	78.594	77.2774	4.38531	3.8796	3.94932			335.929	37.7668	40.5415	42.4052	1.61943	2.77193	2.19265
	337.311	74.6534	77.7487	76.9929	4.2643	3.87418	4.09507			337.311	37.6101	39.9662	41.7142	1.50353	2.67993	2.43113
	338.693	75.0185	77.1861	76.5842	4.57233	3.78845	4.57318			338.693	37.5869	39.7541	41.2325	1.48245	2.27207	2.4888
	340.076	74.6362	78.0632	75.7404	4.99882	3.33416	4.75426			340.076	37.1736	40.2261	40.6983	1.73072	2.16073	2.31858
	341.458	74.9915	77.8503	76.1774	4.47211	3.57903	4.99178			341.458	37.0875	40.4462	40.3833	1.84858	2.00052	2.14643
	342.841	75.4289	78.3163	76.5902	4.11417	3.76713	4.70485			342.841	37.2346	40.673	40.2441	1.80743	2.0101	2.03688
	344.223	75.7782	78.0404	75.2272	4.40275	3.87729	4.63269			344.223	37.1144	40.4526	40.455	2.06306	2.1041	2.26854
	345.606	75.7838	78.4403	76.0157	4.41655	3.63545	5.15594			345.606	37.3677	40.218	40.7652	1.97264	2.15059	2.34203
	346.988	75.5133	77.8031	76.1544	4.67819	3.65446	5.28362			346.988	37.5615	40.8264	40.3699	1.73246	2.24989	2.41921
	348.37	74.9674	77.9452	75.6544	4.50106	3.87817	5.31127			348.37	38.1103	41.3379	40.5923	1.65566	2.48941	2.70838
	349.753	76.7767	78.8769	74.6725	4.82294	4.33126	5.12246			349.753	38.4263	41.1988	40.5808	1.74718	2.75503	2.81442
	351.135	76.8866	77.908	74.8616	5.0887	4.03299	5.37108			351.135	38.6747	41.2624	40.3316	1.86622	2.89304	2.82278
	352.518	76.0882	78.3999	75.1159	4.49026	4.30963	5.58868			352.518	38.4789	40.6057	40.5778	2.03367	2.84606	2.82088
	353.9	75.679	77.9971	74.4966	4.27443	4.25162	5.65783			353.9	38.6456	40.4596	40.7787	1.89293	3.03474	2.83782
	355.283	77.2389	78.1227	74.6403	4.20426	3.90272	5.93288			355.283	38.856	40.9377	40.5092	1.85282	3.33861	2.74937
	356.665	76.9022	78.7099	74.767	4.48865	4.12022	5.77107			356.665	38.8272	40.8439	40.6376	1.58241	3.38374	2.64795
	358.047	76.6748	77.8056	74.8692	4.30338	4.01384	5.89051			358.047	38.5885	40.783	41.1293	1.51195	3.09492	2.88976
	359.43	76.3222	77.7214	75.9162	4.20293	4.2473	5.91989			359.43	38.3983	40.0024	41.1992	1.63754	2.62346	3.1417
	360.812	75.7047	78.5281	76.036	4.59768	4.24758	5.80944			360.812	38.5202	39.9102	41.2123	1.61581	2.54631	3.26796
	362.195	76.3297	77.3103	75.9817	4.5207	4.65406	5.89747			362.195	38.1441	40.0983	41.2846	1.64227	2.65475	3.09678
	363.577	76.6388	77.3024	75.7775	4.50522	4.36487	6.36306			363.577	38.298	40.4658	41.0747	1.64819	2.77431	2.83191
	364.959	76.8037	77.0754	75.7236	3.86962	4.54629	5.91734			364.959	38.2891	40.4224	41.1671	1.42674	2.61308	2.932
	366.342	75.7957	77.5018	75.6607	3.60416	4.46395	5.59385			366.342	38.2991	40.944	41.1943	1.57958	2.61446	3.12607
	367.724	75.3291	77.6837	75.3138	3.52422	4.09389	5.93167			367.724	37.8898	41.0757	41.5818	1.44525	2.64668	3.199
	369.107	74.3216	77.7862	75.7723	3.18469	4.03387	6.08913			369.107	37.7451	41.3271	41.4266	1.65129	2.82227	3.2537
	370.489	75.199	76.572	76.164	3.69079	4.01077	6.08142			370.489	38.2423	41.3266	41.3072	1.70054	3.05899	3.17645
	371.872	74.6733	77.4208	75.4039	3.67474	3.95629	6.18911			371.872	38.0017	41.0753	41.4231	1.49712	3.12335	3.37404
	373.254	74.996	77.6803	74.3332	3.14687	4.49813	6.38686			373.254	37.9587	40.9316	41.3123	1.56998	3.12587	3.45396
	374.636	74.721	77.0802	74.0113	2.89666	4.32292	6.51142			374.636	37.981	41.2238	41.4318	1.51473	3.23983	3.36892
	376.019	73.0391	76.4883	74.8795	2.55188	4.43861	6.07573			376.019	38.4816	41.3741	41.3586	1.45871	3.60203	3.29056
	377.401	73.6104	76.4456	74.6206	2.28041	4.3183	5.92524			377.401	38.1292	41.4944	41.4664	1.18629	3.62383	3.13627
	378.784	72.3051	76.6985	74.4462	2.12698	4.44026	6.34967			378.784	38.4581	41.6838	41.9602	1.19065	3.66383	3.06712
	380.166	72.0585	77.3547	74.3104	2.27857	4.46864	6.23259			380.166	39.0177	41.543	41.9957	1.43629	3.50077	2.97817
	381.548	73.3914	76.7531	73.9153	2.82486	4.07938	5.91254			381.548	39.2643	40.7604	42.1455	1.35272	3.13217	2.97992
	382.931	72.3994	76.7766	73.9663	2.11393	4.37868	6.16039			382.931	38.8331	40.918	42.4366	1.22241	3.0828	3.12008
	384.313	72.3543	76.9138	73.8658	1.6616	3.98389	6.19806			384.313	38.6165	41.3369	42.3854	0.977458	3.12437	3.20655
	385.696	73.0102	76.0443	74.106	2.38177	4.13984	5.65484			385.696	38.4189	41.7606	42.6986	1.1354	3.1669	3.3875
	387.078	73.0605	76.3741	74.3098	2.87903	4.19032	5.45875			387.078	38.8901	42.0072	43.2255	1.24109	3.1367	3.64954
	388.461	73.3616	77.0503	74.2634	2.41198	4.06718	5.45013			388.461	38.8925	41.9368	43.8822	1.21347	3.38046	3.94397
	389.843	74.3958	77.1437	74.6734	2.70348	3.43972	5.47213			389.843	38.8288	41.4312	44.5457	1.35102	3.48867	4.27955
	391.226	73.0281	76.138	75.0879	2.28783	3.52093	5.46419			391.226	39.4322	41.3345	44.5992	1.3646	3.63246	4.2108
	392.608	73.1967	76.7811	75.1067	2.90271	3.27291	5.15452			392.608	39.605	41.4256	43.8673	1.4715	3.54491	3.84051
	393.99	74.5677	75.969	74.2284	2.54514	3.08779	5.23704			393.99	39.7436	41.4433	43.9245	1.76574	3.51285	3.57476
	395.373	74.3414	75.5037	73.9752	2.79571	3.19827	5.03308			395.373	40.4834	42.1593	43.9493	1.73038	3.67563	3.41433
	396.755	75.8361	76.118	74.6171	2.34407	2.98912	4.91967			396.755	40.3097	42.0382	43.9729	1.72152	3.49149	3.40916
	398.138	75.5699	76.03	74.4778	2.60027	3.47874	5.12866			398.138	40.6494	42.1056	43.3398	1.60194	3.45651	3.3315
	399.52	75.6063	74.4891	73.3475	2.64087	3.42894	5.23738			399.52	41.2552	42.2192	43.2005	1.65051	3.59524	3.33043
	400.902	76.0653	75.7803	72.6658	1.65149	3.59653	5.1085			400.902	40.7925	42.4288	43.1534	1.88895	3.83654	3.62014
	402.285	75.7691	75.6566	72.664	1.37544	3.26383	5.49347			402.285	40.7879	42.3469	43.2177	1.59317	3.91798	3.87768
	403.667	75.9978	74.4831	73.4434	1.18574	3.1152	5.38001			403.667	40.0527	42.2548	43.1722	1.44487	3.89022	3.80559
	405.05	75.6782	74.5445	72.6799	0.862458	3.27283	5.2387			405.05	39.8291	42.0875	43.4512	1.09249	4.01262	3.63189
	406.432	75.5676	73.9705	73.1257	0.606336	3.68607	5.63225			406.432	40.5213	41.4099	43.7186	1.21123	4.09223	3.50378
	407.815	76.533	74.2054	73.5051	0.892544	3.88954	5.56562			407.815	40.565	41.6491	43.7477	1.30356	4.21586	3.33484
	409.197	76.7866	74.4529	73.1245	0.784059	3.94076	5.16307			409.197	40.5801	41.6887	43.5955	1.58391	4.26337	3.28144
	410.579	75.8061	75.0129	72.8885	1.07761	4.00654	5.01732			410.579	40.9614	41.6612	43.5798	2.02953	4.26487	3.40335
	411.962	75.0219	74.0187	72.2487	1.16269	3.57469	4.88626			411.962	40.9377	41.827	43.7807	2.03656	4.22658	3.3347
	413.344	75.3796	74.4504	72.1649	1.40561	3.19667	5.11166			413.344	41.1278	41.957	43.9934	2.35888	4.14774	3.5071
	414.727	75.9996	73.8068	72.982	1.66642	3.12793	4.8977			414.727	41.8772	41.8258	44.2374	2.44214	4.16539	3.68303
	416.109	74.8682	72.9622	71.9812	1.57837	3.63495	4.8224			416.109	41.6511	41.987	44.1288	2.21228	4.23527	3.57809
	417.491	73.7927	73.791	71.3229	1.69083	3.72057	4.98592			417.491	41.9135	42.6224	44.5953	2.18782	4.30209	3.5681
	418.874	73.4356	72.8125	71.3838	1.64033	3.33324	4.69865			418.874	41.4154	42.7976	44.7964	2.47492	4.43302	3.49098
	420.256	73.5322	72.9508	71.1827	1.74471	3.48712	4.74743			420.256	41.4262	42.5157	44.3656	2.25638	4.11732	3.29622
	421.639	73.3693	73.5786	70.967	1.79734	3.63587	4.98414			421.639	41.6042	42.2417	43.8412	2.13408	3.88558	3.07126
	423.021	73.6197	74.0583	70.8985	2.38935	3.62258	4.72485			423.021	42.2736	41.7761	43.3476	2.42757	4.13884	2.98643
	424.404	73.3389	73.7904	70.473	1.81875	3.20571	4.78049			424.404	43.1612	41.2442	42.8592	2.74414	3.98767	3.10809
	425.786	74.3128	72.7495	70.116	1.92551	3.32046	4.84641			425.786	43.9998	41.2799	42.7558	3.00881	3.99015	2.94684
	427.168	74.4984	74.0176	70.3805	2.45044	2.95848	4.79555			427.168	44.2444	41.7098	42.9131	2.88644	4.07637	2.75563
	428.551	74.6777	74.6581	69.5981	2.91687	2.58126	4.40437			428.551	44.6877	41.7723	42.9899	2.92258	3.96606	2.82342
	429.933	74.5373	73.5197	68.5821	2.79012	3.00066	4.5549			429.933	44.961	42.271	42.8495	2.92378	3.84654	2.73915
	431.316	74.587	73.351	68.5231	2.80576	2.88707	4.60412			431.316	44.8533	42.044	42.6833	3.15182	3.73286	2.72555
	432.698	73.806	74.2068	68.6091	2.57753	2.4928	4.57698			432.698	43.9913	41.7087	42.9421	2.61546	3.61346	2.76244
	434.081	73.8011	73.6427	68.7176	2.80627	2.90586	4.51289			434.081	43.0005	41.757	43.4179	2.51479	3.45128	2.65756
	435.463	72.8279	73.1593	67.4767	2.97873	3.13439	4.42043			435.463	42.4575	42.1755	43.2939	2.68412	3.6045	2.48159
	436.845	71.8845	73.0345	67.8543	3.18823	2.92302	4.48417			436.845	41.8899	42.5643	42.9737	2.87725	3.67101	2.62465
	438.228	72.1993	72.8843	68.3708	2.82004	2.74134	4.4364			438.228	41.5118	42.7399	42.9117	3.13557	3.65772	2.73349
	439.61	72.5018	73.2965	68.5942	2.77717	2.76609	4.15672			439.61	40.9581	42.9713	42.2546	3.51421	3.70043	2.63787
	440.993	71.8815	72.8878	68.1232	2.96305	2.83875	4.36744			440.993	40.6123	42.8652	42.0715	3.28691	3.60016	2.59004
	442.375	72.11	73.0716	67.5002	3.27196	2.57961	4.61757			442.375	40.6214	42.4731	42.3376	2.92316	3.66844	2.67928
	443.757	71.7322	73.0157	67.6425	3.06547	2.89561	4.25592			443.757	40.2034	42.135	42.5724	2.98121	3.59083	2.77198
	445.14	71.7232	72.5232	67.3145	3.41881	2.94678	4.43674			445.14	40.2273	41.9298	42.1814	3.17789	3.45695	2.75585
	446.522	71.6886	72.7079	66.8164	3.24196	2.9458	4.23889			446.522	39.7533	41.6159	41.4006	2.93163	3.2901	2.73502
	447.905	71.0412	72.6575	67.0722	3.23565	2.83127	3.94299			447.905	40.0079	41.5679	41.5072	2.91929	3.16154	2.88986
	449.287	71.5492	72.6833	66.1598	3.33271	2.77331	3.94085			449.287	40.8963	41.8274	41.272	3.24103	3.14887	2.87913
	450.67	71.488	73.1256	65.6645	3.26367	2.75902	3.78005			450.67	41.1997	42.2199	41.0003	3.39128	3.11944	2.81372
	452.052	70.3626	74.3588	66.5517	3.05509	2.71856	4.12423			452.052	40.8998	42.5517	41.1234	3.53564	3.11117	2.75638
	453.435	70.8988	75.0872	66.9343	3.32709	2.6686	3.88704			453.435	40.7699	42.7269	41.1175	3.26527	3.22423	2.53933
	454.817	70.3917	74.7807	65.9908	3.33082	2.79893	3.79461			454.817	40.4045	41.9524	40.9966	3.46993	3.02122	2.36309
	456.199	69.8772	75.9195	66.4308	3.70299	2.95474	3.7887			456.199	40.556	42.1007	41.206	3.48408	3.19732	2.35292
	457.582	69.3608	75.8674	65.8269	4.2331	2.6643	3.59559			457.582	40.5374	41.4109	41.4523	3.91614	3.04856	2.48659
	458.964	70.2502	74.8107	66.0621	4.61627	2.66167	3.15247			458.964	40.822	41.1843	41.7877	3.9862	3.00705	2.84953
	460.347	70.4175	74.5906	66.2904	4.22367	2.5878	3.30685			460.347	41.1383	40.937	41.9643	3.85331	3.05132	3.13362
	461.729	70.2656	74.0402	65.8035	4.46462	2.42777	2.97779			461.729	41.2008	40.9083	42.1742	3.85739	3.06283	3.3496
	463.111	69.3829	73.8294	66.0045	4.46554	2.80359	2.93838			463.111	40.8568	40.6478	42.646	4.05081	3.07992	3.37438
	464.494	69.2419	74.7933	67.5443	4.41179	2.90207	3.17695			464.494	40.7015	40.4114	42.4503	3.97039	3.09403	3.26981
	465.876	69.7489	74.4378	65.8864	4.17606	2.59074	3.12891			465.876	40.8865	40.5178	42.0294	3.89094	2.82829	3.09769
	467.259	69.9633	74.132	65.5116	3.96672	2.76084	2.84666			467.259	40.9558	40.3758	41.9791	4.13182	2.40163	2.75836
	468.641	70.1844	73.6412	65.8985	4.33156	2.73455	3.07272			468.641	40.661	40.1983	42.1641	4.02207	2.26482	2.592
	470.024	70.7822	73.2102	64.814	4.38507	2.36154	3.24984			470.024	40.3665	40.0458	42.5354	3.92067	2.29253	2.64796
	471.406	69.3811	73.2861	65.3672	3.98022	2.0483	3.00218			471.406	40.7043	40.1551	42.1604	4.16161	2.62269	2.6098
	472.788	69.6509	73.6655	64.7926	4.0156	2.13599	3.32578			472.788	40.3931	40.6478	41.9936	4.06585	2.98301	2.57474
	474.171	70.5875	72.9018	64.0694	4.28616	2.36552	3.20143			474.171	40.0527	41.2749	41.4781	3.81127	3.1409	2.69375
	475.553	70.1366	71.5457	64.0883	4.03947	1.99365	2.59518			475.553	40.1375	41.1405	41.1809	4.03937	2.96036	2.70129
	476.936	70.8782	71.929	63.7543	4.25726	2.30724	2.29207			476.936	40.1804	40.7937	40.8217	3.8198	2.68078	2.70815
	478.318	70.6528	71.5864	63.2185	4.29234	2.63937	3.18084			478.318	39.8422	40.2128	40.6215	3.63238	2.46832	2.59517
	479.7	69.6479	71.4132	63.4633	3.90463	2.1012	3.26541			479.7	40.0454	39.2716	40.7804	3.74952	2.21946	2.5029
	481.083	69.3504	70.2847	63.5972	4.4457	1.92418	3.18586			481.083	40.5448	39.2637	41.0906	3.55698	1.98025	2.51888
	482.465	68.9631	70.9608	63.6395	4.38604	2.35915	3.21172			482.465	40.5321	39.1032	40.9553	3.10411	1.86428	2.44077
	483.848	68.5826	70.2304	63.2359	4.37169	1.83376	3.60598			483.848	40.3603	38.9689	40.6676	3.29903	1.68288	2.32703
	485.23	67.8456	69.2929	62.8429	3.97599	1.55995	3.27516			485.23	40.5249	39.1698	40.7331	3.32533	1.53473	2.54341
	486.613	68.2662	70.2265	63.2674	4.10014	1.83526	2.91708			486.613	40.5091	39.0354	40.3577	3.33311	1.53653	2.72345
	487.995	68.3045	69.979	63.1142	4.06674	1.61984	3.10408			487.995	40.3439	39.3332	40.1047	3.61936	1.57816	2.64498
	489.377	68.2134	69.8348	62.5193	3.88967	2.15221	3.06383			489.377	40.4872	39.4288	39.9609	4.20494	1.73213	2.62362
	490.76	68.3409	69.5604	63.0217	4.20842	1.86301	2.82583			490.76	40.5264	39.3218	39.811	4.21049	1.74582	2.68715
	492.142	68.5362	70.9096	62.9716	3.9056	2.28115	3.2735			492.142	40.4307	39.3653	39.766	3.98632	1.8758	2.69545
	493.525	67.5046	69.6543	63.1928	3.84956	2.65504	3.41361			493.525	40.0922	38.9902	40.1663	3.75832	1.97405	2.80756
	494.907	67.0234	69.3088	62.6249	3.89459	2.29404	3.41092			494.907	40.0187	38.9724	40.7365	4.06878	2.08209	3.03773
	496.29	67.7297	69.1873	62.4114	3.88665	2.13855	2.91593			496.29	40.1738	38.9713	40.9219	4.27714	2.2614	3.3025
	497.672	67.2003	67.8187	62.9559	3.38796	2.2621	2.80448			497.672	40.0965	38.7193	40.8972	4.03848	2.28592	3.30748
	499.054	67.2229	68.0025	63.7341	3.70535	2.11515	2.94158			499.054	40.2709	38.5826	40.9376	3.91538	2.18259	3.21894
	500.437	67.7547	67.9497	63.4022	3.89183	2.51937	3.26659			500.437	40.2284	38.379	40.568	3.95745	2.04749	3.2252
	501.819	67.6369	66.9403	62.3574	4.21655	2.48577	3.24263			501.819	40.255	37.726	40.7576	3.82769	1.94315	3.35128
	503.202	67.7958	67.8093	62.3832	4.42671	2.46357	2.9411			503.202	40.1567	37.7809	40.9487	3.59125	2.0454	3.36481
	504.584	67.746	68.3123	62.8072	4.29916	2.8358	2.86033			504.584	39.9407	38.0102	40.7539	3.92581	2.18779	3.23165
	505.966	67.7899	68.2394	61.7111	4.44343	2.69849	2.98661			505.966	39.3392	38.0053	40.5782	4.01637	2.36386	3.12491
	507.349	68.1159	68.2595	61.6147	4.18057	2.67212	2.97156			507.349	38.7091	38.2652	40.469	3.98113	2.3695	2.98548
	508.731	68.011	67.7262	62.4632	4.38126	3.00221	2.74764			508.731	38.8567	38.1416	40.961	4.19575	2.10209	2.92161
	510.114	68.1425	68.1647	62.2686	4.54521	3.4455	3.12482			510.114	39.476	38.2082	41.1157	4.27129	2.07878	3.15292
	511.496	67.2839	68.0492	62.4291	4.61607	3.60055	3.21087			511.496	39.2301	37.7543	41.282	4.11528	2.13555	3.4414
	512.879	67.5839	67.0391	61.3164	4.38954	3.26209	3.06449			512.879	39.4331	37.4306	41.1675	3.67528	2.06334	3.49382
	514.261	67.9082	66.7464	60.2719	4.51514	3.25766	3.10695			514.261	39.4646	36.926	40.8036	3.55491	2.10158	3.59892
	515.644	67.2372	66.6917	60.9876	5.23052	3.07104	2.89555			515.644	38.9249	37.0109	40.3643	3.53585	2.30773	3.68962
	517.026	66.2545	66.7922	60.9748	4.73276	3.21808	2.86516			517.026	38.1659	37.0997	39.8208	3.55565	2.19378	3.63892
	518.408	65.8245	67.0528	60.4823	4.9251	3.1768	3.03476			518.408	38.1573	37.2368	39.7863	3.9167	2.13254	3.61133
	519.791	66.3215	65.947	59.8487	4.85976	3.50771	3.17954			519.791	38.1951	37.2579	39.4537	4.26013	2.14145	3.47439
	521.173	65.9273	65.2019	59.1901	5.05573	3.20676	3.30698			521.173	37.5948	36.8769	39.3515	4.30214	2.19236	3.35053
	522.556	65.1784	65.7043	59.0893	4.73113	3.13019	3.03046			522.556	37.8214	36.5564	39.5396	4.441	2.33406	3.13904
	523.938	65.4666	65.9758	59.4018	4.76285	3.08514	2.78269			523.938	38.0113	36.4054	39.8025	4.4118	2.57023	3.20636
	525.32	64.2989	65.655	59.9562	4.76595	2.89992	2.98367			525.32	38.0531	36.3172	39.402	4.2966	2.66547	3.25444
	526.703	63.9571	64.8586	59.6644	4.66688	2.87115	3.22618			526.703	38.5577	36.3195	39.4134	4.39484	3.02294	3.2505
	528.085	64.0242	64.7335	59.1732	4.85388	2.97583	2.92248			528.085	38.4656	36.112	39.3679	4.31425	3.15083	3.31399
	529.468	63.7199	65.052	59.5101	4.97653	3.33129	2.87214			529.468	39.1264	35.8092	39.2317	4.69289	2.98868	3.20615
	530.85	63.2285	65.8864	59.2463	4.87278	3.22967	3.03404			530.85	39.7739	35.577	38.8012	5.09647	2.63098	3.1553
	532.232	63.2497	64.2072	59.4301	4.84873	3.52913	3.00728			532.232	39.2436	34.7651	38.8682	5.23702	2.29316	3.36345
	533.615	63.5609	64.7575	60.2886	4.46196	3.89511	3.24611			533.615	38.904	34.1632	38.9466	5.21844	2.14865	3.45688
	534.997	63.8986	65.0009	59.4232	4.91767	4.0187	3.37868			534.997	38.8135	34.2022	39.0587	4.97682	2.18711	3.28687
	536.38	63.5376	65.7733	59.0936	5.0982	4.26009	3.54799			536.38	38.6092	34.0526	39.0795	4.97351	2.17765	3.35704
	537.762	63.0514	65.6512	59.424	4.73985	3.7797	3.09637			537.762	37.8524	34.6632	38.8678	5.15879	2.20177	3.32681
	539.145	63.7192	65.5305	59.4354	4.91155	4.03953	2.88309			539.145	37.577	35.0895	38.772	4.98996	2.49808	3.22444
	540.527	63.3645	65.4001	58.8279	4.89073	4.40244	3.20025			540.527	37.7744	35.5168	38.4823	4.63768	2.56155	3.30483
	541.909	63.9387	65.2143	58.8247	4.99832	3.97118	2.61615			541.909	37.9404	35.537	38.611	4.59667	2.42416	3.25886
	543.292	63.6427	65.5176	58.4511	4.63181	3.67002	2.80793			543.292	37.389	35.8458	38.3184	4.88463	2.37223	3.01729
	544.674	63.6446	64.354	58.9046	4.93408	4.15804	2.61745			544.674	37.0299	35.5637	38.2348	5.1193	2.27992	2.97394
	546.057	63.4232	64.4915	58.9992	5.23663	4.67862	2.59398			546.057	37.2695	35.5549	38.4753	4.94652	2.39251	2.99633
	547.439	62.5835	65.1587	58.9806	5.13647	4.35476	2.7739			547.439	36.9678	35.4114	38.9708	4.93852	2.60522	3.02865
	548.822	62.208	63.8555	59.0239	4.87803	3.92502	2.83582			548.822	36.2183	35.0943	39.2581	5.046	2.9499	3.31428
	550.204	61.5627	63.0495	59.0172	4.81975	3.82925	2.57717			550.204	36.2692	34.9858	38.9954	5.09384	2.93298	3.36279
	551.587	61.9036	64.3501	58.3297	5.04611	3.79825	2.8354			551.587	36.2667	34.734	39.3867	4.95279	2.67229	3.22024
	552.969	62.0901	64.6648	59.0314	4.9973	3.94675	2.56212			552.969	36.2325	34.4974	39.413	4.82601	2.59414	3.10548
	554.351	62.0168	64.0054	59.381	4.97096	3.44956	2.5811			554.351	35.6181	34.149	38.8674	4.52587	2.82817	3.05536
	555.734	62.0672	63.591	57.7067	4.69071	3.76622	3.06196			555.734	35.4102	34.5579	38.5637	4.1126	2.9221	3.10301
	557.116	60.8769	63.2601	57.8481	4.21841	3.51307	2.96949			557.116	35.502	35.0318	38.3544	4.33479	3.05564	3.13652
	558.499	60.3321	62.1001	58.4763	4.41217	3.74269	2.89712			558.499	35.7425	35.1858	38.0214	4.45782	3.20646	3.20495
	559.881	60.9432	63.0725	58.3751	4.71955	3.41975	2.7781			559.881	35.7441	35.0848	37.9933	4.54575	3.32613	3.20172
	561.263	60.1314	63.2113	57.5074	4.49958	3.27123	3.21082			561.263	35.6767	34.8985	38.0449	4.88894	3.28651	3.16972
	562.646	60.2263	62.3572	56.883	4.26135	3.40573	3.20162			562.646	35.4225	34.5527	37.6385	4.75126	3.12759	3.16317
	564.028	60.4505	61.5861	57.239	4.57207	3.43369	3.12811			564.028	35.3375	34.3621	37.4496	4.65314	3.1838	3.11557
	565.411	60.2562	61.2191	58.2337	4.37445	3.30957	3.50704			565.411	35.2709	34.322	36.7469	4.82464	3.22157	3.065
	566.793	59.7603	60.9256	57.421	4.47962	3.63002	3.45867			566.793	34.558	34.3595	36.2579	4.56261	3.14874	3.2016
	568.176	60.0955	60.7794	56.142	4.50217	3.48663	3.04585			568.176	34.4227	34.0897	36.0373	4.68168	2.99525	3.30723
	569.558	60.3289	61.1913	56.0225	5.05455	3.68478	3.23055			569.558	34.6084	33.4444	36.1915	5.06359	2.56468	3.35746
	570.94	60.3177	60.8077	56.1297	5.10403	3.88264	3.356			570.94	34.7072	33.2485	36.2141	4.88897	2.27755	3.33199
	572.323	60.6592	59.3001	55.441	4.60735	3.47038	3.43004			572.323	34.3168	33.35	36.5011	4.49944	2.22316	3.35809
	573.705	60.1578	59.3368	56.3688	4.6012	3.7453	3.30181			573.705	34.1989	33.0226	36.7844	4.52471	2.22497	3.37876
	575.088	59.7557	59.8289	56.2247	4.30793	3.84008	3.29173			575.088	34.2485	32.9117	36.7729	4.58798	2.32274	3.40726
	576.47	59.4983	59.4999	55.2594	4.25463	3.88111	3.15135			576.47	34.3657	33.0858	36.5238	4.65589	2.47754	3.31941
	577.852	60.3151	59.4928	55.2294	4.78288	3.72988	3.10438			577.852	34.7662	32.702	36.6802	4.78367	2.37275	3.29506
	579.235	60.8802	58.4372	56.5781	5.11866	3.44785	3.15241			579.235	34.8872	32.4643	36.3327	4.94383	2.30856	3.29268
	580.617	60.3043	57.6148	56.5888	5.05071	3.47897	2.88657			580.617	34.7531	32.2737	35.6973	4.88586	2.40878	3.43056
	582	59.8451	57.9247	55.627	4.88622	3.78985	2.94516			582	34.8595	32.3636	35.4767	5.39318	2.40474	3.52762
	583.382	60.0306	58.3018	54.9138	4.71791	3.81032	2.78862			583.382	35.0536	32.7107	34.7391	5.20362	2.60364	3.63276
	584.765	59.7088	58.625	54.578	4.54955	3.92238	2.83286			584.765	34.834	33.1023	34.4353	5.19386	2.80966	3.70517
	586.147	58.729	58.1486	54.5195	4.05834	3.72492	2.94292			586.147	34.3227	33.2395	33.907	4.94906	2.75642	3.54391
	587.529	58.2935	57.3592	54.4795	3.78123	4.25253	2.99614			587.529	34.1817	33.3403	33.2941	5.25705	2.87017	3.39681
	588.912	58.9248	56.3101	54.3078	4.33842	3.97422	3.18478			588.912	33.6808	33.0542	33.3005	4.91824	2.97072	3.42217
	590.294	58.4297	57.2947	53.8097	4.45754	4.04002	3.18918			590.294	33.1196	32.6067	33.6486	4.94593	2.96225	3.5051
	591.677	58.0154	56.9954	53.7311	4.97756	4.23236	3.44575			591.677	32.6571	32.3471	33.9312	5.15319	2.92648	3.36518
	593.059	58.2027	56.0438	53.9365	4.5417	4.16754	3.37697			593.059	32.2006	31.4048	33.9103	4.95251	2.72898	3.27773
	594.442	56.8282	56.2888	54.1927	4.77364	4.21538	3.41662			594.442	31.8033	31.1151	33.9628	4.8768	2.63108	3.20925
	595.824	57.046	56.6171	53.9327	4.62938	4.07253	3.38627			595.824	32.1712	30.9	33.6675	5.18979	2.35491	3.32396
	597.206	56.8897	55.4171	53.2181	4.5342	4.10225	3.42475			597.206	32.5534	31.0606	33.5002	5.46765	2.1588	3.41385
	598.589	56.8231	55.0346	52.8167	4.87175	4.03242	3.28966			598.589	32.8713	31.1351	33.5897	5.30971	2.02435	3.49974
	599.971	55.7294	55.5896	53.0574	4.28411	3.92659	3.51326			599.971	32.1731	30.9736	33.3118	4.91661	1.87113	3.63661
	601.354	54.9478	54.4555	52.7756	3.6721	3.59428	3.26793			601.354	32.3964	30.3448	33.2424	5.01665	1.70925	3.73455
	602.736	56.2457	54.7074	52.3789	4.03525	3.40281	3.18317			602.736	32.3462	29.9136	33.421	5.03583	1.90455	3.85202
	604.119	56.2913	54.544	51.7452	4.0413	3.18577	3.29177			604.119	31.8632	29.7866	33.1275	4.88444	2.05383	3.8037
	605.501	55.7326	54.3539	51.4949	4.21053	3.47012	3.66312			605.501	31.8157	29.7759	32.6877	4.89713	2.16149	3.75963
	606.883	55.2029	54.15	51.5514	3.92321	3.31622	3.46939			606.883	31.2239	29.5866	31.9281	4.56896	2.16866	3.78039
	608.266	54.3772	54.8565	51.6172	3.7307	3.45498	3.55878			608.266	30.7245	29.5654	31.6032	4.51903	2.02573	3.72568
	609.648	55.4798	53.9522	51.8095	3.4562	3.07622	3.65527			609.648	30.913	29.2276	31.4328	4.45149	1.85843	3.68074
	611.031	54.5233	53.2308	51.2215	3.33566	3.19344	3.35172			611.031	30.7039	28.6363	31.115	4.45677	1.70233	3.77245
	612.413	54.6635	53.4912	50.2697	3.54056	3.20686	3.35336			612.413	31.046	28.582	30.8749	4.53834	1.82146	3.85678
	613.795	54.5711	53.4209	51.1871	3.5773	3.21632	3.37956			613.795	31.2356	28.6546	30.7528	4.66148	1.98738	3.85588
	615.178	54.7721	53.4574	51.5118	3.77325	3.30323	3.14667			615.178	31.1071	28.9205	30.5718	4.58594	2.0736	3.95027
	616.56	54.0697	53.3051	50.7019	3.83477	3.15563	3.08807			616.56	31.0511	28.7511	30.3912	4.65748	2.14498	3.99667
	617.943	54.6558	52.6603	50.3387	3.63501	3.10393	2.96802			617.943	30.2541	28.444	30.7578	4.51527	2.17316	4.05113
	619.325	54.3663	51.2941	50.4408	3.15823	2.73869	3.00763			619.325	30.8641	28.1061	31.2237	4.68381	2.19147	4.12353
	620.708	55.1097	52.5946	50.7369	3.43475	2.81219	3.03162			620.708	30.8436	28.1054	31.5545	4.76714	2.22853	4.21759
	622.09	53.4718	53.0472	50.1018	3.63897	3.0128	2.82582			622.09	30.53	28.0231	31.4861	4.6038	2.26899	4.43766
	623.472	53.4346	52.8985	49.8945	3.66717	3.35087	2.72412			623.472	30.015	27.5565	31.1559	4.51803	1.90465	4.51039
	624.855	54.524	51.335	49.7043	3.87053	2.96616	2.86119			624.855	30.4174	27.2503	30.8801	4.47473	1.80624	4.54619
	626.237	54.0331	50.7139	50.0553	4.29853	3.08098	3.05469			626.237	29.9861	26.9789	30.752	4.73759	1.89719	4.32252
	627.62	53.7681	51.0917	50.2543	4.03329	3.1607	2.93054			627.62	29.7112	26.7994	30.4963	4.69136	1.92625	4.21683
	629.002	52.3315	50.3416	50.2671	3.86408	3.00924	2.81411			629.002	29.4538	26.795	29.7284	4.46762	1.85482	4.17063
	630.385	53.2164	50.9119	49.6989	3.95636	2.94284	2.81981			630.385	29.5742	27.1082	29.1266	4.76837	1.84863	4.11757
	631.767	53.8142	50.3277	49.4513	3.92774	2.88032	2.80841			631.767	29.8885	26.9439	28.711	4.93478	1.96957	4.09602
	633.149	53.8743	49.7334	49.2208	4.05121	2.70369	2.81169			633.149	30.0743	26.5111	28.7459	4.98476	1.97953	4.20808
	634.532	53.2938	50.0702	49.0929	4.03909	2.64874	3.07109			634.532	30.6747	26.1029	28.7056	5.18388	2.18496	4.2833
	635.914	52.5236	50.172	49.1835	3.83564	2.61761	2.99512			635.914	30.2604	25.5487	28.3242	5.25572	2.31427	4.24117
	637.297	53.1057	50.2536	48.8126	3.85211	2.618	2.79694			637.297	29.6478	25.4037	28.1348	4.84205	2.38485	4.17843
	638.679	52.9759	50.0157	49.0024	3.31465	2.55232	3.05691			638.679	29.2549	25.5989	28.0449	4.86198	2.4256	4.27546
	640.062	52.7055	50.3224	49.0387	2.93041	2.46738	2.96441			640.062	29.103	25.7792	28.0246	4.76673	2.39396	4.4214
	641.444	52.1199	49.9099	48.81	2.91773	2.70176	2.932			641.444	29.1114	25.7067	28.2658	4.70766	2.30869	4.50155
	642.826	52.0982	49.288	49.0164	3.0416	2.62238	3.05605			642.826	29.4267	25.4328	28.1985	4.75921	2.12569	4.59341
	644.209	51.2544	48.8746	47.9439	2.5999	2.11216	2.90243			644.209	29.8404	24.9659	27.8021	4.99522	2.14883	4.75576
	645.591	52.2755	48.7607	47.6155	2.93617	2.15352	2.95777			645.591	29.5507	24.5323	27.5578	4.80298	2.39387	4.86311
	646.974	52.653	48.6628	48.1421	3.07724	2.058	2.82411			646.974	29.1036	24.1098	27.2547	4.61907	2.30948	4.96379
	648.356	51.4152	48.5319	47.9006	2.52854	2.14173	2.71132			648.356	28.8366	23.5719	27.1353	4.62038	2.22175	5.03227
	649.739	51.8867	48.4592	47.9419	3.0038	2.11115	2.66845			649.739	28.7041	23.2331	27.0905	4.58875	2.25357	4.99958
	651.121	51.8558	48.8699	46.7915	3.36207	2.19338	2.74084			651.121	28.7911	23.0136	27.0236	4.4344	2.35758	5.05971
	652.503	51.9576	48.6222	46.6268	3.09881	2.29124	2.85853			652.503	28.6216	22.8437	27.6268	4.51862	2.22389	5.22737
	653.886	51.7794	47.8779	47.2528	2.78086	2.43915	2.53197			653.886	28.6044	22.835	27.988	4.5477	2.37997	5.26561
	655.268	52.0699	47.7859	48.0241	2.72669	2.44078	2.76874			655.268	28.3067	22.988	28.289	4.41255	2.75319	5.26111
	656.651	51.6506	48.7484	47.4135	2.69217	2.46167	2.99453			656.651	27.9655	22.8041	28.3674	4.45488	2.73975	5.26603
	658.033	50.9533	48.8076	47.4469	2.31935	2.76855	2.7671			658.033	28.2664	22.5812	27.9592	4.61296	2.80842	5.23841
	659.415	50.8047	48.1071	47.2443	2.82136	2.53938	2.85344			659.415	28.9508	22.6488	27.5917	4.78658	2.77838	5.02933
	660.798	50.8373	48.7715	47.2276	2.53985	2.78395	2.84695			660.798	29.0864	22.1094	27.1014	4.89879	2.64665	5.16341
	662.18	51.2349	47.8234	47.701	2.58022	2.84147	3.00542			662.18	28.8334	21.6088	26.8247	5.01042	2.61141	5.18129
	663.563	51.0128	47.8028	47.4708	2.69255	3.06327	3.10096			663.563	28.2925	21.5308	26.3138	4.93928	2.57005	5.03808
	664.945	51.0451	48.1773	47.5132	2.72877	2.90971	2.96758			664.945	28.0368	21.7641	25.7873	5.04698	2.85111	5.05634
	666.327	50.3904	47.8837	47.5116	2.68088	3.09178	2.76315			666.327	27.9157	21.7315	25.5549	5.16797	3.03472	4.97336
	667.71	49.9882	46.7597	47.0762	2.73624	2.61899	2.81079			667.71	28.202	21.9624	25.6281	5.00057	3.0803	4.94878
	669.092	50.3405	46.9203	47.1583	2.63813	2.58406	2.87181			669.092	27.5374	22.1887	25.6255	4.73932	3.27197	5.13188
	670.475	49.9056	46.926	46.9649	2.28503	2.78938	2.99975			670.475	27.0315	22.0596	25.4241	4.80297	3.33986	5.15014
	671.857	49.4173	47.0956	47.0658	2.19175	2.98725	2.966			671.857	27.1512	21.559	25.2686	4.88621	3.16553	5.16402
	673.24	49.5243	47.1185	47.1064	1.92547	2.88416	2.89247			673.24	26.795	20.766	25.4078	5.01837	2.88618	5.32354
	674.622	49.0565	46.5042	46.6911	2.27997	2.50922	3.00081			674.622	27.0312	20.2798	25.2416	5.15495	2.76918	5.45986
	676.005	48.2943	46.1535	46.6253	2.3794	2.67165	2.8431			676.005	26.588	19.9563	25.2824	5.28836	2.68088	5.42626
	677.387	49.2726	46.1818	46.0469	2.39582	2.86719	2.67546			677.387	26.4119	19.4229	25.2269	4.99671	2.73491	5.38339
	678.769	49.6116	45.2371	46.3114	2.91158	2.62452	2.66232			678.769	26.7404	19.1049	25.203	5.25693	2.70606	5.28777
	680.152	50.4482	44.7645	46.0799	2.5929	2.63998	2.96086			680.152	26.9938	18.8174	25.2237	5.41656	2.65386	5.35516
	681.534	49.9795	44.8537	45.9174	2.94235	2.7758	3.02652			681.534	27.0071	18.6129	25.1966	5.44188	2.51234	5.40718
	682.917	49.2823	45.0577	45.5739	2.5022	2.56603	3.20966			682.917	26.835	18.369	25.0453	5.22911	2.41527	5.38427
	684.299	48.9866	44.542	45.2027	1.68948	2.51238	3.06309			684.299	27.065	18.1527	24.9407	4.75442	2.5308	5.33254
	685.681	48.3477	44.0977	45.5907	1.63439	2.56421	3.15049			685.681	27.0984	17.8936	24.7136	4.47211	2.46135	5.3422
	687.064	48.1083	44.4603	45.0156	1.8724	2.52527	2.98404			687.064	26.6923	17.7144	24.9584	4.40139	2.53783	5.51763
	688.446	48.609	44.8476	45.151	1.61903	2.73848	2.93372			688.446	26.3348	17.8616	24.9828	4.45862	2.65168	5.60462
	689.829	48.3213	44.7995	45.4572	1.57894	3.17517	3.10627			689.829	25.9217	17.8521	24.8889	4.23136	2.71166	5.56177
	691.211	47.8568	44.1309	46.1599	1.82643	2.71063	3.02257			691.211	25.5699	17.8627	25.0654	4.09544	2.79964	5.49298
	692.593	48.7681	44.0335	45.2952	2.06191	2.6559	3.03717			692.593	24.9468	17.859	24.8507	3.88493	2.89275	5.36418
	693.976	49.1703	44.739	44.0774	1.87686	2.66839	3.00886			693.976	25.3015	17.6344	24.7022	3.97973	2.83483	5.32476
	695.358	48.3958	44.6247	44.0817	1.60349	2.75111	3.14443			695.358	25.72	17.5149	24.6135	3.96207	2.79793	5.21961
	696.741	49.0513	44.2867	44.5786	2.17904	3.07479	3.0496			696.741	25.3031	17.5186	24.5537	3.87214	2.87457	5.23796
	698.123	48.3561	44.1111	44.7875	2.23937	2.51907	2.86077			698.123	24.8381	17.283	24.5886	4.05544	2.90074	5.30105
	699.506	48.21	44.3197	45.0545	2.35812	2.86195	3.03434			699.506	24.6276	17.0439	24.7678	4.19444	2.87873	5.42405
	700.888	47.7717	44.1158	44.8155	2.23005	2.73936	3.45667			700.888	24.0349	16.9866	24.8516	4.03309	3.05665	5.42861
	702.27	47.8969	44.1936	44.6983	2.24343	2.79166	3.27726			702.27	24.0438	16.8483	24.5604	3.98965	3.14275	5.33394
	703.653	47.9144	44.3318	44.6265	2.83976	2.60839	3.27863			703.653	24.1339	16.5734	24.1534	4.16291	3.11366	5.2068
	705.035	47.3314	44.3789	44.7133	2.80156	2.83042	3.57122			705.035	24.22	16.2799	23.9564	4.22437	3.01011	5.1363
	706.418	47.5357	44.0324	44.869	2.45903	2.66316	3.52369			706.418	24.243	16.0733	23.9977	4.21167	2.92075	5.14504
	707.8	47.8202	42.9711	44.74	1.92268	2.56556	3.48625			707.8	24.2959	15.8126	23.9926	4.05919	2.81083	5.24553
	709.183	47.3943	42.2854	45.0551	2.00706	2.20397	3.77791			709.183	25.0341	15.5943	24.0208	4.41231	2.85847	5.24391
	710.565	46.9193	42.9715	44.9834	2.26875	2.52027	4.07079			710.565	25.4098	15.4184	24.0309	4.83472	2.80662	5.12407
	711.947	46.4009	43.0354	44.6388	2.02559	2.9534	4.29801			711.947	25.2636	15.1829	24.0541	4.55841	2.83663	5.05819
	713.33	46.8563	43.2036	44.9116	1.88154	2.53957	4.08112			713.33	25.2693	15.0116	24.1359	4.45265	2.78784	5.05799
	714.712	47.0183	42.7206	45.1251	1.90812	2.7065	4.26121			714.712	25.4122	15.1365	24.4553	4.44017	2.78634	5.1264
	716.095	46.6982	43.1574	45.106	2.14055	2.51213	4.52811			716.095	24.7997	15.0964	24.8674	4.36583	2.75985	5.16596
	717.477	46.5979	42.3065	45.8322	2.92781	2.46709	4.45328			717.477	23.8937	14.8046	25.0265	4.20934	2.75967	5.30822
	718.86	46.7548	42.7957	45.6175	2.87546	2.50648	4.33886			718.86	23.948	14.8223	25.3788	4.07946	2.74534	5.39379
	720.242	46.6384	42.7023	45.8028	2.75346	2.58879	4.40839			720.242	23.816	14.9012	25.5273	4.20191	2.99971	5.49509
	721.624	46.458	42.5962	45.3864	2.87736	2.46296	4.35117			721.624	23.7503	14.7054	25.5792	4.24552	3.01289	5.5627
	723.007	45.7936	42.7267	45.3352	2.7152	2.34354	3.9864			723.007	23.4711	14.6597	25.6223	4.51046	3.02601	5.73013
	724.389	45.6282	42.662	45.6193	2.5544	2.4297	3.65346			724.389	23.1861	14.2859	25.4536	4.42524	3.04064	5.76433
	725.772	45.881	42.6628	45.2606	2.65714	2.28849	3.35829			725.772	23.1129	14.3586	25.3117	4.20069	2.91736	5.64445
	727.154	45.4705	42.584	44.856	2.53387	2.45354	3.36855			727.154	22.525	14.2411	24.6653	4.07942	2.91309	5.32606
	728.537	45.0521	42.0383	44.9953	2.33232	2.23939	3.61498			728.537	21.9728	14.0953	24.2605	4.1133	2.98996	4.92788
	729.919	45.6248	42.1348	44.8505	3.16073	2.01632	3.50467			729.919	21.9588	14.0453	24.1372	3.95248	2.92314	4.84193
	731.301	45.8453	42.0847	44.8553	3.08837	2.15452	3.11416			731.301	22.1153	14.0406	24.1221	4.17218	2.8781	4.80212
	732.684	45.1273	41.9708	44.3503	2.30603	2.00465	3.19742			732.684	21.7246	14.023	24.1802	4.19683	2.89139	4.85227
	734.066	44.9072	42.4555	44.4437	2.44675	1.64122	3.32836			734.066	21.7917	13.8177	24.0783	4.3136	2.68256	4.85829
	735.449	44.6245	42.5854	44.4929	2.26958	1.36566	3.15136			735.449	21.4955	13.4929	24.2511	3.82205	2.43765	4.84499
	736.831	44.4269	42.1652	45.0293	2.75543	1.75625	2.94717			736.831	21.471	13.1718	24.4723	3.66509	2.32885	4.84443
	738.213	44.9837	41.8291	44.9808	2.62138	2.03954	3.02251			738.213	21.7799	13.1503	24.359	3.82139	2.25403	4.83157
	739.596	45.425	40.8357	44.8675	2.7936	1.66338	3.09308			739.596	21.6797	13.0572	24.4197	4.04732	2.22826	4.90218
	740.978	44.5461	41.2709	45.1417	2.94918	1.51751	3.08217			740.978	21.843	13.0916	24.5486	4.16858	2.27425	4.90907
	742.361	44.6218	42.0009	45.5844	3.25982	1.75213	3.14317			742.361	22.1205	13.0166	24.2914	4.17367	2.36384	4.77207
	743.743	44.1198	41.7482	45.5171	3.29208	1.29408	2.99059			743.743	22.0606	12.8925	24.2237	4.0829	2.35122	4.60177
	745.125	43.7618	41.991	45.7729	3.06196	1.6118	2.81094			745.125	21.9849	12.5517	24.1232	4.00258	2.27859	4.56672
	746.508	44.5461	41.7849	45.4877	3.25982	1.75213	3.08217			746.508	21.4955	13.4929	24.2511	3.82205	2.43765	4.84499
	747.89	44.5461	41.1958	46.4439	3.06196	1.29408	3.14317			747.89	21.471	13.1718	24.4723	3.66509	2.32885	4.84443
	749.273	44.5461	38.3032	47.4393	3.29208	1.6118	2.99059			749.273	21.7799	13.1503	24.359	3.82139	2.25403	4.83157

## Sheet: 4H
	Intensity					Density					Size
		CON (4)	DE (6)	DEL (6)		(0.01mm2)	CON (5)	DE (6)	DEL (7)		(um2)	CON (4)	DE (6)	DEL (6)
		15.5127	13.8103	16.8032			9.36018	7.28014	7.28014			0.992318	1.33733	1.04107
		16.2939	15.9246	13.697			8.58727	5.72485	42.5786			0.311417	0.316625	0.272908
		20.4304	15.9071	16.3371			11.4497	25.404	34.3491			0.346812	0.353141	0.307948
		12.7614	11.7409	12.898			12.8809	11.0919	7.15606			0.322083	0.395226	0.2443
			12.25	12.2497			0	17.1745	1.07341				0.316375	0.234
			7.91433	10.8763				1.07341	7.15606				0.174667	0.5895
									0
	mean	16.2496	12.9245	13.8102			8.45561	11.2915	14.2276			0.493158	0.482227	0.448288
