# Supplementary material for: Light reintroduction after dark exposure reactivates plasticity in adults via perisynaptic activation of MMP-9
Source: eLife. 2017 Sep 6;6:e27345. doi: 10.7554/eLife.27345 (PMC5630258; doi:10.7554/eLife.27345)
Supplement: Figure 5—figure supplement 1—source data 1. [file elife-27345-fig5-figsupp1-data1.xlsx]

## Sheet: Fig5-Sup1
Time (ms)	0	0.0422903	0.0845806	0.126871	0.169161	0.211452	0.253742	0.296032	0.338323	0.380613	0.422903	0.465194	0.507484	0.549774	0.592065	0.634355	0.676645	0.718935	0.761226	0.803516	0.845806	0.888097	0.930387	0.972677	1.01497	1.05726	1.09955	1.14184	1.18413	1.22642	1.26871	1.311					slope	time 2 peak	ratio
WT	-0.0791444	-0.0962203	-0.122523	-0.201799	-0.391128	-0.685166	-0.950337	-1	-0.773311	-0.399001	-0.0624788	0.14961	0.263447	0.332622	0.380559	0.408197	0.418564	0.420312	0.417743	0.407249	0.383445	0.345371	0.296245	0.240269	0.181368	0.122717	0.0663115	0.0139884	-0.032399	-0.0722592
FS	-0.0252673	-0.0551192	-0.110251	-0.236403	-0.471467	-0.774622	-1	-0.995489	-0.744856	-0.381536	-0.0634476	0.13747	0.237048	0.278525	0.289788	0.281944	0.263352	0.243133	0.226003	0.210599	0.192656	0.170217	0.146694	0.125932	0.105245	0.0781319	0.0436195	0.00992457	-0.0126938	-0.0223687
	-0.0831878	-0.112722	-0.152705	-0.253269	-0.467495	-0.763838	-0.992988	-1	-0.772452	-0.441346	-0.145748	0.0671584	0.222409	0.348543	0.447585	0.511071	0.539272	0.539516	0.516654	0.472523	0.411209	0.340091	0.266399	0.194967	0.128547	0.068132	0.0136195	-0.034331	-0.0738661	-0.104061
	-0.00721056	-0.0147806	-0.0308645	-0.111929	-0.339476	-0.700549	-1	-0.999518	-0.668253	-0.209355	0.165177	0.404025	0.569012	0.709448	0.819305	0.875341	0.87338	0.8253	0.742248	0.632714	0.507963	0.379272	0.253772	0.136716	0.0326555	-0.057215	-0.134435	-0.199782	-0.253187	-0.295191
	-0.00108001	0.00389328	0.00980573	-0.0541822	-0.296787	-0.695157	-1	-0.953316	-0.575618	-0.124479	0.191343	0.360931	0.474974	0.584324	0.672563	0.709442	0.689522	0.627985	0.542343	0.444471	0.342963	0.245	0.154167	0.0703929	-0.00589938	-0.0718476	-0.124908	-0.165521	-0.196966	-0.222393
	-0.0188924	-0.0872511	-0.178381	-0.312202	-0.512841	-0.766142	-0.975201	-1	-0.790244	-0.456197	-0.168102	-0.00697749	0.0629791	0.110149	0.162627	0.208405	0.232468	0.236674	0.231726	0.223256	0.209581	0.189104	0.165166	0.142698	0.123003	0.104188	0.0853516	0.0675167	0.0512805	0.0364821
	-0.111099	-0.156625	-0.212656	-0.321204	-0.527055	-0.800271	-1	-0.973898	-0.707675	-0.342442	-0.0438162	0.120117	0.185004	0.217455	0.252169	0.283124	0.291679	0.272483	0.2364	0.197086	0.160835	0.128543	0.101121	0.0799883	0.0648056	0.053452	0.0439142	0.0347196	0.0243178	0.0119916
	-0.0930086	-0.15295	-0.228472	-0.350247	-0.547446	-0.794665	-0.985639	-1	-0.816067	-0.531704	-0.266767	-0.0727019	0.0636746	0.166614	0.243075	0.291382	0.314692	0.320291	0.312541	0.291365	0.257156	0.215106	0.172849	0.134637	0.100401	0.069539	0.0430999	0.0225837	0.0078738	-0.00308112
	-0.0387	-0.102619	-0.188526	-0.324267	-0.538416	-0.802736	-1	-0.999704	-0.785448	-0.475965	-0.210931	-0.0432607	0.056365	0.128413	0.183094	0.21343	0.220632	0.21678	0.211382	0.204453	0.191969	0.172964	0.150313	0.127705	0.107083	0.0877173	0.0684057	0.0507173	0.0373362	0.027851
	-0.0181324	-0.0214045	-0.0281885	-0.0777754	-0.263101	-0.633706	-1	-0.97549	-0.387197	0.457667	1.05819	1.19032	1.00616	0.764967	0.586669	0.446522	0.299471	0.149146	0.0238336	-0.0651101	-0.127816	-0.176288	-0.213514	-0.23823	-0.251738	-0.257767	-0.25868	-0.25494	-0.247639	-0.238685
	0.0007793	-0.106645	-0.237827	-0.402411	-0.607563	-0.824987	-0.980392	-1	-0.872823	-0.657626	-0.431791	-0.241219	-0.0922476	0.0247611	0.113999	0.173269	0.203831	0.213638	0.21223	0.206207	0.197941	0.186532	0.171901	0.15781	0.147381	0.136876	0.119687	0.0962589	0.074284	0.0595144
	-0.0073515	-0.0767904	-0.163011	-0.289254	-0.489508	-0.752422	-0.970141	-1	-0.806934	-0.50354	-0.231726	-0.0454415	0.0814026	0.181074	0.257684	0.304542	0.324618	0.328434	0.322837	0.308813	0.286042	0.25521	0.218682	0.180278	0.142839	0.107292	0.0739166	0.0425973	0.0131647	-0.0138087
	-0.00710627	-0.0756014	-0.169286	-0.314912	-0.533734	-0.793433	-0.98684	-1	-0.815259	-0.528039	-0.261456	-0.0802485	0.0216919	0.0805583	0.123583	0.157694	0.179209	0.186538	0.18315	0.173478	0.160787	0.147152	0.132913	0.117941	0.103646	0.091165	0.0786587	0.0636994	0.0471676	0.0323528
	-0.0485367	-0.0627185	-0.0817004	-0.162655	-0.387948	-0.734548	-1	-0.968911	-0.648384	-0.251588	0.0333736	0.182216	0.268469	0.34667	0.420422	0.475432	0.506945	0.519696	0.518435	0.504575	0.477341	0.435837	0.382393	0.322793	0.261359	0.198472	0.134169	0.0710341	0.0122455	-0.0406395
	-0.0187559	-0.0287938	-0.0429775	-0.10166	-0.286286	-0.629406	-0.966952	-1	-0.619438	-0.0649235	0.334194	0.474269	0.477166	0.48425	0.529568	0.571754	0.577167	0.550638	0.511697	0.468873	0.418812	0.357368	0.285147	0.205968	0.123741	0.0411816	-0.0383319	-0.109037	-0.166228	-0.211369
	0.0510973	0.110872	0.161317	0.101323	-0.163947	-0.587131	-0.941264	-1	-0.753555	-0.390329	-0.0884915	0.114482	0.270469	0.416211	0.541925	0.624146	0.65539	0.644118	0.602677	0.54115	0.46744	0.388223	0.309227	0.234674	0.165899	0.101649	0.0410403	-0.0145819	-0.0632203	-0.104497
WT	-0.116652	-0.197188	-0.285779	-0.405151	-0.586053	-0.812557	-0.987445	-1	-0.839454	-0.605356	-0.401035	-0.25128	-0.125102	0.00100324	0.119064	0.20906	0.264649	0.296174	0.315481	0.326682	0.328503	0.318799	0.298436	0.27199	0.243998	0.217167	0.192492	0.169713	0.149791	0.132159
RS	-0.0147766	-0.132116	-0.237659	-0.369029	-0.574149	-0.82767	-1	-0.964869	-0.739938	-0.469326	-0.271323	-0.149539	-0.0505666	0.0428938	0.108217	0.139702	0.162647	0.19602	0.229299	0.242791	0.239014	0.239716	0.254986	0.270916	0.269468	0.251144	0.231227	0.216676	0.197684	0.159633
	0.04389	-0.0574772	-0.171037	-0.335537	-0.57831	-0.842115	-1	-0.961486	-0.756211	-0.505278	-0.313619	-0.197525	-0.109805	-0.0127802	0.0848618	0.152977	0.183124	0.191508	0.188946	0.173328	0.14842	0.130969	0.136497	0.165245	0.204671	0.23935	0.257957	0.259108	0.247606	0.22106
	0.0383774	-0.0792594	-0.195397	-0.344312	-0.571588	-0.835309	-1	-0.968839	-0.78601	-0.576105	-0.413539	-0.284512	-0.154539	-0.0260905	0.0775402	0.149538	0.20108	0.240815	0.267584	0.282702	0.297605	0.319583	0.339436	0.342486	0.319541	0.267569	0.198008	0.13585	0.096766	0.0732974
	0.179888	0.0666449	-0.0669742	-0.248977	-0.50123	-0.77838	-0.973276	-1	-0.864063	-0.644638	-0.422896	-0.236088	-0.0842427	0.0414471	0.143241	0.215616	0.24969	0.244519	0.214769	0.182177	0.159681	0.146107	0.134712	0.123717	0.119146	0.126018	0.137344	0.142051	0.140596	0.137064
	0.0469413	-0.0691185	-0.214603	-0.39532	-0.618739	-0.84997	-1	-0.991902	-0.835598	-0.615663	-0.41078	-0.243749	-0.101245	0.0262819	0.13213	0.203812	0.236593	0.240823	0.234038	0.224091	0.209258	0.192811	0.182239	0.176296	0.166359	0.148531	0.126525	0.106089	0.090876	0.0823209
	-0.00140834	-0.112533	-0.238788	-0.39527	-0.607455	-0.84392	-1	-0.981872	-0.798842	-0.549209	-0.325085	-0.152556	-0.0132176	0.106147	0.19718	0.247948	0.258784	0.243057	0.21939	0.199452	0.184302	0.171406	0.15932	0.150863	0.153202	0.168188	0.18538	0.190139	0.177543	0.153756
	-0.0128938	-0.111992	-0.225842	-0.382097	-0.601891	-0.844286	-1	-0.97245	-0.768791	-0.491354	-0.243669	-0.0637953	0.062773	0.155313	0.2141	0.234645	0.228461	0.216854	0.208454	0.197594	0.181885	0.165905	0.150491	0.130791	0.104671	0.0767472	0.0528607	0.034182	0.018434	0.00407678
	-0.0655911	-0.137599	-0.234735	-0.383431	-0.600308	-0.841628	-1	-0.980796	-0.785106	-0.502057	-0.228348	-0.0128909	0.138087	0.235665	0.292614	0.31788	0.319859	0.308929	0.290875	0.265749	0.235931	0.207249	0.183094	0.161335	0.136635	0.107163	0.0774725	0.0520567	0.0302427	0.0105687
	-0.00901935	-0.108344	-0.237344	-0.411707	-0.631723	-0.856538	-1	-0.985531	-0.816412	-0.574669	-0.348706	-0.173543	-0.0388437	0.0693645	0.151677	0.204659	0.23104	0.241324	0.245831	0.24572	0.235516	0.213389	0.184434	0.15508	0.128598	0.104512	0.0805535	0.05745	0.0431974	0.0481583
	0.0345366	-0.114886	-0.271392	-0.442605	-0.646536	-0.859549	-1	-0.992206	-0.841482	-0.628516	-0.436292	-0.292723	-0.177126	-0.0681163	0.0298305	0.105465	0.160696	0.200489	0.220168	0.214852	0.195874	0.186602	0.197412	0.212592	0.208716	0.18052	0.143201	0.113283	0.0941825	0.0812471
	0.0274178	-0.0838637	-0.21759	-0.382714	-0.5893	-0.8109	-0.971826	-1	-0.891143	-0.70598	-0.508706	-0.324095	-0.151927	0.000757954	0.117136	0.189305	0.22412	0.233799	0.229968	0.222413	0.214774	0.204081	0.188329	0.169635	0.150908	0.13556	0.126448	0.120842	0.112181	0.0995373
	-0.0229105	-0.15753	-0.290355	-0.439154	-0.630013	-0.840532	-0.988774	-1	-0.874717	-0.678966	-0.480204	-0.304385	-0.144292	0.00590141	0.131477	0.21188	0.245598	0.252014	0.249974	0.243198	0.229774	0.21473	0.204956	0.198981	0.188709	0.169135	0.143913	0.122777	0.11424	0.117474
	0.0556553	-0.0525761	-0.179306	-0.344787	-0.563981	-0.803543	-0.975468	-1	-0.879133	-0.688754	-0.500669	-0.335617	-0.185079	-0.0466079	0.068791	0.149088	0.194801	0.219952	0.23781	0.248855	0.247997	0.238594	0.229989	0.223916	0.212079	0.187573	0.153815	0.120959	0.0956035	0.0767837
	-0.0128464	-0.153656	-0.297998	-0.456391	-0.645885	-0.84725	-0.989815	-1	-0.867957	-0.654328	-0.432548	-0.239732	-0.0796688	0.0510017	0.151041	0.220389	0.264816	0.289404	0.2946	0.283666	0.264321	0.239668	0.20865	0.174469	0.140667	0.104824	0.0672367	0.0364227	0.0193256	0.0150396
	0.0829852	-0.0465576	-0.190707	-0.361521	-0.568294	-0.784958	-0.947899	-1	-0.936479	-0.800837	-0.639859	-0.474184	-0.309779	-0.156718	-0.026341	0.0772443	0.154006	0.203755	0.228967	0.236344	0.232799	0.221789	0.204439	0.182715	0.160048	0.139091	0.120877	0.10731	0.101426	0.103604
	0.133084	-0.021697	-0.194611	-0.388001	-0.604438	-0.817781	-0.967365	-1	-0.917796	-0.772386	-0.6151	-0.464114	-0.316096	-0.172336	-0.0440268	0.0595196	0.138029	0.196142	0.235033	0.2517	0.247158	0.229127	0.205522	0.181163	0.160362	0.14679	0.140221	0.136582	0.131455	0.122873
	-0.0311921	-0.165885	-0.305887	-0.462042	-0.652427	-0.854865	-0.993643	-1	-0.880286	-0.704624	-0.536551	-0.393179	-0.262688	-0.134828	-0.011639	0.097918	0.185177	0.244408	0.274363	0.280138	0.271002	0.255185	0.236691	0.216039	0.192518	0.166659	0.143541	0.129008	0.118831	0.102566
	0.105922	-0.0468725	-0.220153	-0.416823	-0.635953	-0.84575	-0.983159	-1	-0.905789	-0.753466	-0.590257	-0.433261	-0.282749	-0.14135	-0.0179265	0.0786011	0.144792	0.183417	0.200632	0.203329	0.198779	0.194311	0.193901	0.194868	0.191261	0.181036	0.166993	0.152582	0.140214	0.130953
	-0.0153012	-0.176074	-0.338979	-0.50687	-0.690364	-0.872492	-0.994725	-1	-0.890366	-0.724396	-0.559423	-0.413893	-0.281048	-0.155397	-0.039685	0.0593559	0.134527	0.184067	0.215195	0.236482	0.249752	0.253102	0.245911	0.228402	0.201831	0.169738	0.137011	0.110446	0.0984422	0.103371
	-0.0709778	-0.19177	-0.314834	-0.45681	-0.643819	-0.855515	-1	-0.987583	-0.826758	-0.61227	-0.425057	-0.27584	-0.139376	-0.00585376	0.113101	0.205021	0.266149	0.299202	0.310495	0.306082	0.288782	0.260376	0.224355	0.184253	0.141912	0.0996139	0.0620913	0.033794	0.0151101	0.0037709
	-0.0242559	-0.117863	-0.234941	-0.393266	-0.598894	-0.815899	-0.968853	-1	-0.918484	-0.781918	-0.639316	-0.501592	-0.359357	-0.213322	-0.0800402	0.0234542	0.092713	0.136261	0.165424	0.187859	0.21152	0.243997	0.284168	0.323805	0.358167	0.386629	0.404872	0.404383	0.381861	0.34523
	-0.00700489	-0.128021	-0.259955	-0.428827	-0.647106	-0.867581	-1	-0.986627	-0.851744	-0.674624	-0.518596	-0.387405	-0.252728	-0.111765	0.00834259	0.0956455	0.166608	0.234609	0.295298	0.342293	0.373744	0.384124	0.36931	0.340645	0.316309	0.296544	0.264943	0.21875	0.179043	0.163312
	-0.0858555	-0.180565	-0.293489	-0.449758	-0.657537	-0.870413	-1	-0.985309	-0.849135	-0.673993	-0.526394	-0.41292	-0.302265	-0.176686	-0.0505286	0.0562355	0.138838	0.200515	0.244379	0.274644	0.293389	0.29756	0.287804	0.273002	0.262253	0.257977	0.25199	0.230045	0.190488	0.15303
	0.0964093	-0.0254737	-0.18194	-0.378642	-0.614591	-0.849472	-1	-0.998761	-0.858502	-0.658637	-0.469242	-0.306889	-0.160163	-0.0273925	0.0824756	0.165155	0.223148	0.258555	0.271188	0.265878	0.25303	0.236521	0.212601	0.182596	0.153072	0.126082	0.100947	0.0790576	0.060235	0.0442267
	-0.00814338	-0.120408	-0.256523	-0.420424	-0.628551	-0.853868	-1	-0.974294	-0.784366	-0.53225	-0.316406	-0.160942	-0.0340142	0.0882229	0.190816	0.246664	0.252733	0.230836	0.203537	0.182306	0.172733	0.174283	0.177783	0.173555	0.159438	0.140109	0.123533	0.11592	0.115577	0.112627
	0.0440148	-0.0867089	-0.231193	-0.393533	-0.59178	-0.812034	-0.977546	-1	-0.864783	-0.641482	-0.413461	-0.219364	-0.0606408	0.0638978	0.150924	0.204907	0.234161	0.238887	0.218347	0.18439	0.1553	0.138802	0.128089	0.113106	0.0923511	0.073106	0.0618673	0.0599647	0.0679643	0.0840853
	-0.0255185	-0.14273	-0.27626	-0.436913	-0.64115	-0.858734	-1	-0.988328	-0.835049	-0.621519	-0.420159	-0.25122	-0.102474	0.0338512	0.15157	0.244799	0.310564	0.339838	0.327808	0.288221	0.240981	0.197096	0.162459	0.139023	0.120764	0.10132	0.0830361	0.0724362	0.0719136	0.0783688
	-0.0368463	-0.161945	-0.276482	-0.40847	-0.603033	-0.837293	-1	-0.984313	-0.793267	-0.533026	-0.309673	-0.154722	-0.0438418	0.0450701	0.109684	0.143109	0.152716	0.15425	0.154372	0.147934	0.135165	0.129683	0.140881	0.15612	0.152138	0.124828	0.0928784	0.0689421	0.0487265	0.0309766
	-0.00289494	-0.124672	-0.250296	-0.410049	-0.629007	-0.861319	-1	-0.967828	-0.787398	-0.554306	-0.353125	-0.206446	-0.0953592	-0.00505025	0.0659864	0.120856	0.164787	0.198031	0.217494	0.223969	0.223815	0.220269	0.209153	0.186505	0.153444	0.115145	0.0792921	0.0517052	0.0342552	0.0277663
	0.0120618	-0.10321	-0.244688	-0.417307	-0.624343	-0.836317	-0.982774	-1	-0.887862	-0.707264	-0.52342	-0.362913	-0.222878	-0.0997826	0.00310175	0.0832212	0.140552	0.176679	0.196136	0.204012	0.203741	0.199537	0.195609	0.193073	0.191787	0.191452	0.188895	0.179858	0.16458	0.147887
	0.164675	0.0242293	-0.171966	-0.418273	-0.6785	-0.89101	-1	-0.986844	-0.873979	-0.703984	-0.516713	-0.339279	-0.186905	-0.0660349	0.0238421	0.0874711	0.129682	0.153117	0.16004	0.15534	0.145873	0.137035	0.131354	0.129414	0.130703	0.133858	0.136656	0.136888	0.134072	0.131897
	0.0614352	-0.0562873	-0.198714	-0.370879	-0.578714	-0.797703	-0.961314	-1	-0.899354	-0.713037	-0.514366	-0.342926	-0.199736	-0.0765763	0.025936	0.104807	0.163282	0.205903	0.232441	0.241407	0.235124	0.21978	0.201889	0.184229	0.164914	0.141275	0.115407	0.0951575	0.0870059	0.0882299
	0.048755	-0.0534874	-0.184247	-0.351583	-0.557938	-0.777024	-0.945987	-1	-0.922519	-0.755006	-0.55826	-0.373486	-0.216579	-0.0904817	0.00661361	0.0779658	0.126951	0.158087	0.176992	0.188036	0.192925	0.191682	0.185066	0.176153	0.169102	0.166152	0.165276	0.160747	0.147804	0.127341
	-0.0109062	-0.109514	-0.227903	-0.382638	-0.58663	-0.809814	-0.972819	-1	-0.883212	-0.684167	-0.476401	-0.297261	-0.149348	-0.0255997	0.0759607	0.152926	0.204893	0.236783	0.254839	0.261076	0.25467	0.237145	0.213879	0.191153	0.172279	0.156462	0.140873	0.12344	0.104389	0.0857566
	0.133545	0.00498184	-0.155277	-0.348672	-0.572773	-0.79695	-0.958104	-1	-0.918224	-0.758462	-0.576379	-0.405888	-0.256213	-0.125487	-0.0141085	0.0714044	0.124387	0.146124	0.146957	0.139693	0.133248	0.131755	0.137082	0.149307	0.163943	0.172682	0.169708	0.155576	0.134804	0.112532
	-0.0509559	-0.179613	-0.318999	-0.471425	-0.651151	-0.84266	-0.981399	-1	-0.891602	-0.71441	-0.533944	-0.374441	-0.230029	-0.100136	0.00443365	0.0757799	0.115107	0.132406	0.142008	0.152289	0.160985	0.16198	0.155975	0.153161	0.161722	0.176934	0.187573	0.188436	0.182759	0.177302
	-0.0232474	-0.146461	-0.287539	-0.451984	-0.648076	-0.849679	-0.988004	-1	-0.883946	-0.696967	-0.502893	-0.333386	-0.19158	-0.0733691	0.0219462	0.0937074	0.143914	0.176241	0.191799	0.189877	0.174343	0.154679	0.140299	0.137067	0.145988	0.162456	0.179225	0.191169	0.197058	0.19763
	-0.109935	-0.179907	-0.264087	-0.392601	-0.591372	-0.825955	-0.993283	-1	-0.844985	-0.609922	-0.381458	-0.197799	-0.0561985	0.0546047	0.137738	0.192428	0.221951	0.233148	0.231171	0.218828	0.20015	0.180898	0.165406	0.154317	0.144768	0.133064	0.119187	0.107767	0.102201	0.0997093
	0.145031	0.0236232	-0.137152	-0.33926	-0.572137	-0.798438	-0.957691	-1	-0.921121	-0.760199	-0.56581	-0.370456	-0.191962	-0.0433838	0.0665588	0.136988	0.173301	0.184301	0.180225	0.167897	0.149176	0.127546	0.11029	0.101382	0.0983453	0.0966659	0.0930675	0.086558	0.0794348	0.0752329
	0.0630538	-0.049427	-0.19039	-0.368257	-0.58201	-0.799873	-0.958686	-1	-0.913828	-0.742113	-0.540263	-0.343615	-0.167572	-0.0229138	0.0807539	0.143031	0.174853	0.190131	0.197785	0.20121	0.201141	0.196714	0.186668	0.172646	0.159376	0.149396	0.140344	0.129255	0.11595	0.101412
	-0.00292981	-0.137537	-0.285965	-0.459227	-0.664871	-0.870336	-1	-0.994429	-0.868818	-0.693584	-0.524919	-0.373284	-0.228875	-0.0918551	0.0278443	0.125245	0.201591	0.255167	0.282004	0.283921	0.269193	0.247848	0.227416	0.210153	0.195848	0.186259	0.181767	0.177415	0.169243	0.160287
	0.136769	-0.0058951	-0.175362	-0.374686	-0.598595	-0.81417	-0.963883	-1	-0.919786	-0.763953	-0.581786	-0.401616	-0.232715	-0.0830439	0.0369889	0.123391	0.180397	0.21508	0.233955	0.242116	0.243476	0.240339	0.232464	0.219395	0.202487	0.182555	0.160503	0.140479	0.126251	0.116627
	0.0258377	-0.123617	-0.290893	-0.477341	-0.684221	-0.880937	-1	-0.986032	-0.848276	-0.651736	-0.459879	-0.296956	-0.157659	-0.034214	0.0704514	0.147055	0.190383	0.20595	0.206646	0.202847	0.199662	0.19954	0.199971	0.194554	0.18117	0.16426	0.148982	0.137201	0.128363	0.120499
	0.0235372	-0.110664	-0.265522	-0.444578	-0.648661	-0.849652	-0.985841	-1	-0.888194	-0.703415	-0.509233	-0.337783	-0.190678	-0.0630235	0.0435643	0.124132	0.17835	0.212566	0.233179	0.241401	0.237415	0.225224	0.209051	0.18867	0.162153	0.131379	0.103071	0.0843259	0.07681	0.076527
MMP	-0.0280426	-0.0969486	-0.188311	-0.329037	-0.543398	-0.802148	-0.996913	-1	-0.769798	-0.391082	-0.0103921	0.260916	0.39219	0.414712	0.378974	0.324919	0.273812	0.232423	0.199493	0.171515	0.146984	0.126677	0.110514	0.0955224	0.0781636	0.0586352	0.0410408	0.028462	0.0198399	0.0128286
FS	0.0423622	-0.0455819	-0.158165	-0.318158	-0.541032	-0.789639	-0.970045	-1	-0.878808	-0.67605	-0.463495	-0.273483	-0.109498	0.0286788	0.13684	0.212505	0.259599	0.285617	0.296898	0.297332	0.289222	0.273628	0.25101	0.223035	0.193307	0.165919	0.143534	0.126363	0.112338	0.0983699
	-0.0585254	-0.106941	-0.176298	-0.30211	-0.51652	-0.787052	-0.991852	-1	-0.791669	-0.474226	-0.176031	0.0499989	0.220744	0.361371	0.472733	0.543808	0.571376	0.561815	0.523371	0.463127	0.388584	0.308214	0.229722	0.157601	0.0925406	0.033755	-0.0184438	-0.0625392	-0.0972252	-0.122721
	0.0025793	-0.0153691	-0.0856278	-0.257242	-0.541113	-0.846258	-1	-0.884805	-0.549529	-0.154489	0.173483	0.406017	0.569241	0.685155	0.758326	0.790509	0.789616	0.765504	0.723764	0.665995	0.593424	0.508342	0.414167	0.316227	0.220853	0.131997	0.0500345	-0.0254935	-0.0934168	-0.0414989
	-0.014594	-0.0230684	-0.0547661	-0.165673	-0.407707	-0.74282	-1	-0.987779	-0.6803	-0.244629	0.126967	0.3648	0.506884	0.602517	0.664431	0.688219	0.679815	0.653141	0.613266	0.554954	0.475696	0.381965	0.284052	0.190107	0.104477	0.0279951	-0.0407001	-0.101679	-0.152154	-0.190288
	-0.0594619	-0.113649	-0.195127	-0.335928	-0.556576	-0.816545	-1	-0.990576	-0.776736	-0.461272	-0.164623	0.0592097	0.220604	0.34582	0.445285	0.514511	0.548431	0.54959	0.525414	0.482137	0.423523	0.353574	0.277638	0.201116	0.129076	0.0662011	0.0144442	-0.0286518	-0.0667126	-0.100145
MMP	0.0374912	-0.109187	-0.272883	-0.454188	-0.653948	-0.847444	-0.979097	-1	-0.909892	-0.753009	-0.577186	-0.405226	-0.24006	-0.08482	0.048309	0.147397	0.212556	0.25347	0.278625	0.291717	0.295242	0.292567	0.286506	0.277716	0.265248	0.248793	0.230056	0.211049	0.191563	0.170475
RS	0.0458387	-0.0654504	-0.202428	-0.374139	-0.586928	-0.813646	-0.978358	-1	-0.864762	-0.640016	-0.41251	-0.228399	-0.0899539	0.0153501	0.0960051	0.155894	0.197521	0.222994	0.23526	0.237497	0.230661	0.215179	0.194888	0.17524	0.158279	0.142816	0.128239	0.115428	0.105548	0.0992596
	0.0704226	-0.0407741	-0.184062	-0.363118	-0.574916	-0.790213	-0.950082	-1	-0.931478	-0.783025	-0.603461	-0.422279	-0.250281	-0.0942355	0.0371909	0.137988	0.208157	0.251435	0.272148	0.274435	0.262769	0.241939	0.216394	0.190036	0.165796	0.144549	0.125569	0.109197	0.0978807	0.0927976
	-0.0167273	-0.115942	-0.232138	-0.387314	-0.592111	-0.810356	-0.966601	-1	-0.911835	-0.756816	-0.591993	-0.441764	-0.305977	-0.184035	-0.0827364	-0.00862106	0.0386249	0.0667092	0.0868428	0.106097	0.123172	0.134272	0.140994	0.14854	0.158367	0.167479	0.174342	0.180804	0.187532	0.191693
	-0.093671	-0.190153	-0.307961	-0.455208	-0.637795	-0.832275	-0.97517	-1	-0.893719	-0.707071	-0.508598	-0.338818	-0.204314	-0.0983274	-0.0164607	0.043537	0.0860396	0.11652	0.139601	0.158809	0.175196	0.186762	0.190858	0.187831	0.182429	0.180727	0.186504	0.200121	0.218723	0.237335
	-0.0753142	-0.148166	-0.243464	-0.384198	-0.589487	-0.825275	-0.992991	-1	-0.842684	-0.602724	-0.368685	-0.180375	-0.0387419	0.0630484	0.129404	0.166904	0.185846	0.195396	0.198862	0.195195	0.184417	0.170672	0.160097	0.155234	0.152331	0.145814	0.13495	0.124508	0.118325	0.114072
	0.0141594	-0.133875	-0.293724	-0.46616	-0.662044	-0.863014	-0.999628	-1	-0.863559	-0.662951	-0.473023	-0.318152	-0.185114	-0.0624028	0.0433889	0.119657	0.164101	0.186222	0.197284	0.202931	0.204029	0.200812	0.194815	0.186859	0.17542	0.160881	0.148239	0.140476	0.134441	0.127559
	-0.0163611	-0.0867175	-0.168045	-0.286031	-0.483048	-0.750289	-0.971698	-1	-0.807994	-0.515543	-0.260703	-0.088757	0.0318386	0.13398	0.21893	0.27679	0.308598	0.323319	0.327021	0.32113	0.306017	0.28251	0.251734	0.216029	0.179364	0.145019	0.112904	0.0806092	0.0474585	0.0161496
	0.0310365	-0.0923489	-0.240607	-0.415713	-0.620124	-0.828103	-0.975477	-1	-0.895167	-0.712825	-0.515582	-0.337757	-0.186161	-0.059731	0.0392748	0.106873	0.143291	0.155866	0.155794	0.152234	0.149778	0.148688	0.146889	0.144565	0.145022	0.149116	0.153131	0.154197	0.153809	0.154127
	-0.00346189	-0.1186	-0.258061	-0.423952	-0.617857	-0.816677	-0.963438	-1	-0.914581	-0.74855	-0.558084	-0.37878	-0.221911	-0.0886035	0.0198558	0.101477	0.156527	0.189041	0.205109	0.208839	0.202353	0.190126	0.179629	0.177196	0.183467	0.190519	0.185694	0.163865	0.134521	0.112336
	0.0721117	-0.0807623	-0.255934	-0.447183	-0.65248	-0.852023	-0.989814	-1	-0.865999	-0.644541	-0.417655	-0.227497	-0.0693665	0.0656675	0.166483	0.22038	0.234719	0.230313	0.222441	0.214655	0.206391	0.199563	0.19513	0.190359	0.184746	0.180888	0.176823	0.164446	0.137001	0.0962586
	-0.0817068	-0.185366	-0.304243	-0.453713	-0.651127	-0.863943	-1	-0.979714	-0.811643	-0.579264	-0.362574	-0.189477	-0.0533865	0.0522483	0.129741	0.18878	0.239291	0.274886	0.281191	0.258524	0.221626	0.182808	0.145452	0.108487	0.073484	0.048704	0.0437043	0.058735	0.0825291	0.102442
	-0.00442449	-0.123661	-0.263532	-0.433165	-0.643334	-0.861175	-1	-0.983574	-0.819824	-0.593716	-0.38876	-0.231316	-0.106306	-0.000373773	0.0815407	0.131315	0.154428	0.163942	0.165733	0.161141	0.157267	0.161504	0.171061	0.178197	0.180066	0.176673	0.167076	0.153344	0.139975	0.127645
	0.0438061	-0.0496707	-0.172921	-0.345191	-0.576914	-0.827776	-0.999034	-1	-0.830423	-0.578067	-0.337489	-0.150546	-0.0149662	0.0808206	0.141687	0.172083	0.183968	0.19138	0.198994	0.200254	0.187108	0.161225	0.134387	0.116424	0.10715	0.101505	0.0960075	0.0899303	0.0838995	0.0764494
	0.0469504	-0.0800483	-0.224427	-0.39483	-0.608863	-0.841074	-1	-0.998	-0.840165	-0.613071	-0.397432	-0.220172	-0.0759195	0.0405316	0.128786	0.189266	0.224829	0.242819	0.254069	0.263228	0.266689	0.262374	0.252281	0.238301	0.222641	0.205846	0.184284	0.156578	0.125487	0.0905633
	-0.0571398	-0.175696	-0.308602	-0.466822	-0.664224	-0.870012	-1	-0.980363	-0.817701	-0.591837	-0.382973	-0.217997	-0.0832471	0.0320455	0.119614	0.169941	0.18794	0.188006	0.181903	0.172531	0.15741	0.138876	0.125179	0.118129	0.109175	0.09381	0.0801012	0.07601	0.0792238	0.0855995
	0.0287943	-0.106421	-0.267728	-0.454583	-0.668617	-0.876714	-1	-0.971081	-0.800926	-0.570191	-0.357247	-0.190973	-0.065931	0.0272355	0.0950612	0.142065	0.169267	0.181545	0.190949	0.204575	0.217034	0.219612	0.211298	0.197648	0.183352	0.168581	0.149549	0.123693	0.0946788	0.0678681
	-0.0233366	-0.152594	-0.29004	-0.448873	-0.647422	-0.860199	-1	-0.980571	-0.805359	-0.56868	-0.364301	-0.218657	-0.110012	-0.0155542	0.0713104	0.145251	0.195811	0.217546	0.216299	0.202024	0.181297	0.15953	0.141534	0.128184	0.118904	0.11655	0.125462	0.143387	0.158134	0.158982
	-0.0081436	-0.127594	-0.261205	-0.425198	-0.637084	-0.859784	-1	-0.984136	-0.82812	-0.618625	-0.432161	-0.286875	-0.163838	-0.0500599	0.0465628	0.112686	0.147171	0.16065	0.165086	0.168142	0.171922	0.174127	0.172825	0.168665	0.162664	0.155779	0.148956	0.141752	0.13406	0.128393
	0.0683745	-0.0492466	-0.194494	-0.374659	-0.596105	-0.827099	-0.986662	-1	-0.867964	-0.663831	-0.462794	-0.291906	-0.143649	-0.012696	0.0922201	0.160977	0.192916	0.197296	0.189648	0.183058	0.179266	0.173683	0.167443	0.165621	0.166805	0.165203	0.160357	0.156095	0.153286	0.149391
	-0.0472851	-0.156561	-0.273756	-0.420814	-0.624434	-0.852941	-1	-0.975113	-0.794118	-0.572398	-0.393665	-0.262443	-0.144118	-0.0291855	0.0696833	0.146833	0.204525	0.242081	0.260181	0.264706	0.266968	0.266968	0.257919	0.235294	0.211765	0.188914	0.166968	0.145023	0.132127	0.131674
	-0.0364444	-0.134889	-0.246667	-0.397778	-0.611111	-0.848889	-1	-0.984444	-0.82	-0.597778	-0.4	-0.251111	-0.13	-0.0233333	0.0686667	0.142444	0.196889	0.233333	0.253333	0.262222	0.264444	0.266667	0.262222	0.244444	0.216889	0.181778	0.146889	0.115111	0.0835556	0.0493333
	-0.0710794	-0.167617	-0.270876	-0.409369	-0.615071	-0.851324	-1	-0.96945	-0.778004	-0.537678	-0.340122	-0.196945	-0.0830957	0.0147454	0.0906314	0.137678	0.162118	0.179837	0.202444	0.224033	0.232179	0.230143	0.228106	0.226069	0.209776	0.179633	0.148676	0.13279	0.14053	0.16558
	0.0845272	-0.00487106	-0.131232	-0.315186	-0.561605	-0.810888	-0.979943	-1	-0.885387	-0.704871	-0.52149	-0.34957	-0.194556	-0.0573066	0.0544413	0.138395	0.196562	0.231805	0.244126	0.236963	0.218625	0.195702	0.171347	0.149857	0.13639	0.133524	0.137822	0.140688	0.132378	0.108023
	-0.0176136	-0.136591	-0.265909	-0.431818	-0.643182	-0.863636	-1	-0.986364	-0.838636	-0.636364	-0.443182	-0.284091	-0.157727	-0.0604545	0.0107273	0.0656818	0.112727	0.146591	0.159091	0.155	0.145227	0.131136	0.109773	0.0865909	0.0718182	0.0718182	0.0861364	0.109545	0.131818	0.144091
WT	MMP	WT	MMP		WT	MMP	WT	MMP
Evoked	Evoked	Spont	Spont		Evoked	Evoked	Spont	Spont
RS	RS	RS	RS		FS	FS	FS	FS
0.85	1.295	0.52	2.395		11.84	4.87	6.075	1.89
1.385	2.76	3.42	2.585		6.86	4.185	3.59	6.88
0.815	3.345	2.315	2.92		11.59	4.215	7.32	6.46
1.09	1.715	2.41	1.64		5.19	6.34	6.825	5.465
1.375	1.79	2.025	1.27		5.93	5.77	4.2	3.38
0.665	1.705	2.315	1.185		6.18	4.64	4.08
0.7	2.58	1.945	2.035		6.845		3.935
0.61	1.69	1.28	3.77		8.7		4.7
1.04	1.96	0.95	3.605		3.925		3.725
0.905	1.455	1.05	3.075		4.95		8.33
0.74	2.395	0.935	3.63		4.95		5.865
1.435	3.24	1.835	3.55		10.445		9.1
1.29	2.355	1.39	2.59		8.21		7.645
1.4	4.145	1.935	3.51		11.065		3.36
0.975	2.115	1.325	1.465		5.195		3.81
3.29	3.085	2.925	2.98		5.44
1.67	2.905	2.07	2.35
2.845	3.785	3.06	2.8
2.115	2.43	1.94	1.915
1.745	1.395	1.97	1.25
0.625	1.2	1.025	1.23
1.225	1.575	0.895	2.25
0.595	1.145	0.87	1.435
0.785	1.17	1.03	2.255
0.835	2.465	0.825	1.73
0.695		0.765
0.685		0.79
0.61		0.62
0.705		0.59
2.825		2.895
3.78		3.705
3.405		3.885
3.86		4.665
3.84		4.725
1.825		3.085
1.715		2.58
1.69		2.52
3.485		4.26
2.94		2.36
2.115		2.22
1.135		0.685
1.455		0.955
1.09		0.7
0.825		0.545
0.7		0.56
WT			WT+LRx			MMP			MMP+LRx
RS	FS		RS	FS		RS	FS		RS	FS
0.52	6.075		1.945	2.91		2.395	17.275		3.7	5.565
3.42	3.59		1.81	4.585		2.585	1.89		4.46	6.065
2.315	7.32		1.275	2.39		2.92	6.88		2.89	11.13
2.41	6.825		1.24	3.29		1.64	6.46		2.065	5.135
2.025	4.2		2.18	3.605		1.27	5.465		2.11	5.495
2.315	4.08		2.63	3.12		1.185	3.38		2.09
1.945	3.935		6.055	3.415		2.035			3.445
1.28	4.7		4.82	4.49		3.77			3.1
0.95	21.24		5.47	4.09		3.605			3.08
1.05	3.725		1.325	4.655		3.075			3.18
0.935	8.33		1.705	5.165		3.63			4.02
1.835	5.865		2.745	7.275		3.55			5.535
1.39	9.1		1.205	5.55		2.59			4.145
1.935	7.645		3.195	2.805		3.51			5.255
1.325	3.36		3.08	4.405		1.465			4.93
2.925	3.81		2.565	1.88		2.98			0.92
2.07			1.225			2.35			0.95
3.06			1.34			2.8			1.68
1.94			1.195			1.915			1.71
1.97			0.84			1.25			1.1
1.025			1.83			1.23			1.355
0.895			1.6			2.25			1.385
0.87			1.08			1.435			1.365
1.03			3.55			2.255			1.33
0.825			3.39			1.67
0.765			1.775
0.79			1.745
0.62			2.03
0.59			2.7
2.895			2.26
3.705			2.24
3.885			3.34
4.665			3.025
4.725			2.74
3.085			4.68
2.58			2.6
2.52			2.27
4.26			2.54
2.36			4.65
2.22			3.56
0.685			3.37
0.955			1.095
0.7			2.315
0.545			1.2
0.56			1.29
