# Supplementary material for: Light reintroduction after dark exposure reactivates plasticity in adults via perisynaptic activation of MMP-9
Source: eLife. 2017 Sep 6;6:e27345. doi: 10.7554/eLife.27345 (PMC5630258; doi:10.7554/eLife.27345)
Supplement: Figure 5—figure supplement 2—source data 1. [file elife-27345-fig5-figsupp2-data1.xlsx]

## Sheet: Fig5-Sup2
II/III			IV				MMP			WT			MMP	WT
WT	MMP		WT	MMP			Contra	Ipsi		Contra	Ipsi		CBI	CBI
0.0442884	0.046473		0.0442884	0.046473			107.31	76.2273		107.086	39.4849		0.169354	0.461217
0.0583787	0.0499682		0.0583787	0.0499682			83.3863	52.9351		97.6697	47.0844		0.223378	0.349456
0.0181833	0.0264845		0.0181833	0.0264845			102.303	69.4065		112.943	42.7712		0.191584	0.450645
0.0248461	0.0336934		0.0248461	0.0336934			149.507	83.8301		68.5384	40.7428		0.281467	0.254349
0.0281229	0.0627477		0.0281229	0.0627477			205.643	70.9878		49.8571	22.3765		0.486769	0.38044
0.026976	0.0292698		0.026976	0.0292698			87.5576	42.0202		67.2983	30.4574		0.351429	0.376866
0.0232077	0.0176371		0.0232077	0.0176371			86.8822	46.1095		108.905	46.5795		0.306581	0.400846
0.021897	0.0255014		0.021897	0.0255014			63.3621	32.613		24.2953	27.3121		0.320387	-0.058458
0.0461453	0.0271398		0.0461453	0.0271398			82.7797	40.2022		39.3169	32.8022		0.34621	0.0903323
0.0286144	0.0293244		0.0286144	0.0293244			91.7606	44.5717		81.595	35.6784		0.346132	0.391535
0.0267029	0.0260476		0.0267029	0.0260476			116.08	64.5847		75.4166	31.6121		0.285033	0.409278
0.0317274	0.0297613		0.0317274	0.0130496			113.931	78.9053		36.1812	28.9014		0.181636	0.111855
0.0264845			0.0264845							54.4758	28.895			0.306832
0.0272491			0.0272491							131.129	72.063			0.290691
0.0356595			0.0356595							57.3595	50.3769			0.064812
0.0347857			0.0347857							29.0775	26.8391			0.0400322
0.0328742			0.0328742							44.3362	22.3822			0.329055
0.0327104			0.0327104							99.0801	36.902			0.457252
0.0280137			0.0280137							122.489	59.052			0.349437
0.0318366			0.0217877							41.2805	23.0381			0.283626
0.035878			0.0236446							56.0586	33.1297			0.257084
WT
Acuity	0	0.02	0.05	0.1	0.2	0.3	0.45	0.6		Contrast	1	3	5	12	20	25	50	75	90	100
50% Contrast	292.512	370.509	267.462	225.794	220.218	122.102	127.898	95.2617		0.02 cpd	67.9652	121.17	154.518	251.819	224.047	237.154	320.894	371.196	295.607	286.805
	133.298	183.699	141.235	112.305	137.895	118.89	85.0538	75.3012			57.114	63.615	96.0897	126.94	127.282	133.381	119.805	151.979	134.642	160.948
	250.547	114.273	149.456	120.82	115.572	110.843	76.4924	83.2093			67.9887	66.365	59.5619	81.0802	155.772	118.889	123.633	139.038	113.019	189.776
	243.141	232.337	104.001	102.719	168.704	87.8787	77.6569	91.1917			75.9259	105.197	81.973	122.194	155.732	106.702	205.924	191.564	155.402	165.442
	208.256	189.36	118.817	44.7944	99.9436	99.2334	85.2358	60.8148			46.238	70.5355	60.7088	126.613	166.055	138.765	110.479	235.99	199.475	224.994
	172.332	165.13	90.4733	40.5418	68.8959	83.6974	75.5891	50.7487			49.6035	53.8949	76.2884	98.0099	129.798	104.212	161.343	207.294	154.199	182.252
	248.887	250.017	144.041	114.715	89.7859	54.7971	58.2511	56.5722			74.2721	64.3022	83.3935	148.396	194.501	173.876	193.914	199.207	149.332	264.12
	93.9933	121.15	87.3574	73.6687	76.9466	89.9175	73.4251	48.0086			40.7953	31.7763	74.3816	100.018	108.602	93.0684	99.9159	87.0571	94.6855	93.0522
	61.3615	91.0078	48.9035	63.3958	72.4273	85.5209	47.4685	46.4498			49.7151	38.2517	54.9746	58.723	74.6323	67.7353	88.9633	70.8928	80.1359	55.1593
	44.2721	46.8107	48.036	46.1766	65.588	42.959	41.9371	40.2103			39.1367	51.8707	48.3317	54.408	69.9797	52.6684	50.3477	45.5628	50.2983	60.5133
	50.7715	74.297	52.488	58.355	70.2399	54.3186	66.2687	48.8197			50.8381	32.4406	61.686	82.2306	66.4728	83.2481	82.8677	67.052	63.1139	75.3706
MMP
Acuity	0	0.02	0.05	0.1	0.2	0.3	0.45	0.6		Contrast	1	3	5	12	20	25	50	75	90	100
50% Contrast	313.219	265.141	161.11	138.229	80.3413	73.9619	58.0582	82.4016		0.02 cpd	73.4656	89.9999	108.805	158.323	169.641	217.734	265.737	302.433	228.756	232.479
	286.846	148.67	99.9688	77.8987	71.3815	39.882	56.2524	50.4655			66.8157	52.3525	58.9284	86.3044	126.694	83.6181	132.086	132.93	152.511	164.855
	210.73	226.863	90.8338	116.106	61.3199	55.0032	57.4449	54.2907			47.8065	67.7616	80.7792	214.257	251.693	217.291	189.85	214.208	251.179	252.499
	133.206	174.425	113.196	102.403	59.7891	78.136	62.429	60.5357			55.1155	49.5821	55.2336	138.847	167.555	118.219	174.649	143.231	150.335	151.086
	163.25	148.533	103.805	154.813	152.805	133.036	85.9828	66.0267			48.4889	83.824	99.7699	126.78	151.735	141.892	211.573	242.855	208.493	203.341
	82.003	95.2704	121.911	87.9402	89.3774	81.8154	62.8347	66.7026			64.1026	58.0735	73.9517	59.3986	66.3832	91.85	81.8559	112.741	85.3296	112.327
	94.7033	72.4099	84.4664	64.7044	87.4339	69.5716	84.7144	41.7873			39.246	37.914	42.4011	67.2888	88.4482	72.9274	82.036	107.322	90.8123	118.203
	107.69	69.1196	104.24	110.976	93.4262	116.685	81.9212	35.2192			34.7689	47.448	54.4156	91.0515	82.5669	84.478	108.79	99.0734	95.4182	115.271
	251.583	203.578	166.268	145.649	209.697	100.644	63.926	70.712			68.6408	65.8767	71.0319	194.588	229.26	188.277	181.209	199.399	184.28	285.255
	115.934	177.276	89.391	129.654	128.447	115.832	77.748	87.2096			37.6078	53.2158	105.848	144.997	254.62	149.475	150.101	164.333	192.138	199.062
