# Supplementary material for: Light reintroduction after dark exposure reactivates plasticity in adults via perisynaptic activation of MMP-9
Source: eLife. 2017 Sep 6;6:e27345. doi: 10.7554/eLife.27345 (PMC5630258; doi:10.7554/eLife.27345)
Supplement: Figure 5—source data 1. [file elife-27345-fig5-data1.xlsx]

## Sheet: 5
WT- LRx
RS
Baseline	-0.0320687	-0.026591	-0.0211134	-0.0156358	-0.0101582	-0.0046806	0.000797015	0.00627463	0.0117522	0.0172299	0.0227075	0.0281851	0.0336627	0.0391403	0.0446179	0.0500955	0.0555731	0.0610507	0.0665284	0.072006	0.0774836	0.0829612	0.0884388	0.0939164	0.099394	0.104872	0.110349	0.115827	0.121304	0.126782	0.13226	0.137737	0.143215	0.148693	0.15417	0.159648	0.165125	0.170603	0.176081	0.181558	0.187036	0.192513	0.197991	0.203469	0.208946	0.214424	0.219901	0.225379	0.230857
	1	0	1	1	1	1	1	2	3	3	1	0	0	2	2	2	0	4	0	0	1	0	0	0	1	0	0	1	0	1	0	1	1	1	0	2	0	1	0	2	0	0	1	3	0	1	0	1	1
	0	0	0	0	0	1	0	0	0	0	1	0	0	0	0	0	0	1	0	0	0	1	1	2	2	3	1	0	0	2	0	1	1	1	1	3	0	1	1	1	0	1	0	0	0	3	0	0	1
	0	0	0	2	1	0	0	0	0	0	0	0	1	0	2	1	2	0	0	1	1	0	0	0	1	0	1	0	1	1	0	1	2	0	1	1	1	0	0	0	0	0	0	1	0	1	1	0	1
	1	0	0	1	1	2	1	2	1	2	0	0	1	0	1	4	2	2	0	0	0	0	2	0	0	2	2	0	1	1	1	2	0	0	0	1	0	0	0	1	0	0	0	1	0	0	0	0	0
	0	0	0	1	0	1	0	1	0	1	0	0	0	0	0	1	1	0	1	0	0	0	0	1	2	3	1	1	0	0	1	0	0	0	1	0	3	0	1	0	0	0	0	0	0	0	1	0	0
	2	0	4	2	1	1	2	1	0	2	1	2	3	2	2	1	2	1	3	0	1	2	1	0	1	1	3	0	1	1	2	0	0	1	2	1	3	2	2	2	1	2	0	2	3	1	1	0	2
	1	1	0	3	0	0	0	1	0	2	0	1	0	1	0	2	0	0	2	0	0	0	0	0	2	0	0	0	0	0	0	0	2	1	1	1	2	1	0	3	0	1	1	2	2	1	0	1	0
	2	1	3	1	1	1	0	3	2	1	2	1	1	0	1	1	0	0	0	1	1	1	0	0	0	1	0	0	0	2	0	4	1	0	1	0	2	0	1	3	1	0	1	1	0	1	1	0	1
	0	0	2	1	2	2	1	10	5	3	0	4	3	0	3	1	2	2	2	1	1	1	0	3	0	0	1	4	1	1	3	0	2	0	0	1	2	1	4	1	1	1	1	3	2	0	1	1	2
	1	1	1	2	0	2	1	2	2	0	0	0	2	0	0	0	0	0	0	0	0	1	0	1	0	2	2	1	0	0	1	1	0	0	0	0	1	1	0	2	1	0	1	2	0	1	1	0	0
	0	3	1	1	0	2	1	0	3	1	3	1	2	0	1	3	1	0	1	0	0	0	0	0	1	1	0	0	0	0	2	1	0	0	0	1	1	0	0	0	1	0	1	0	0	0	1	1	1
	2	1	0	3	2	1	0	0	1	1	0	2	1	1	0	0	2	0	0	0	3	1	2	1	1	2	2	4	0	1	0	0	0	1	2	1	2	0	1	2	4	3	3	2	0	0	2	1	1
	0	0	2	1	0	2	1	1	2	0	1	2	1	0	1	0	0	0	0	1	1	1	0	1	1	0	0	0	4	2	2	0	1	0	0	2	0	1	2	0	1	2	1	2	3	0	1	3	1
	3	1	2	0	1	0	0	2	3	1	2	2	0	1	0	4	2	0	0	0	3	4	0	0	2	3	3	0	1	1	2	0	0	1	0	0	3	1	0	1	1	0	2	0	2	2	1	0	0
	0	4	1	2	0	0	0	1	1	2	0	0	0	2	0	1	1	1	2	1	1	1	2	1	1	2	3	1	0	2	1	2	1	0	1	4	0	0	0	1	1	0	1	2	1	1	0	0	1
	3	1	3	1	2	1	1	6	0	4	4	7	0	4	2	2	3	4	6	6	1	1	3	3	2	2	2	2	2	3	3	4	2	5	1	2	3	3	2	2	3	7	3	2	2	1	1	5	1
	1	0	4	0	0	0	0	3	2	2	2	3	4	0	1	2	1	0	2	1	1	2	2	1	0	1	2	2	0	1	2	2	3	1	2	1	3	2	4	3	3	3	1	2	2	0	1	2	3
	3	3	4	2	4	3	3	4	1	2	3	4	2	0	3	2	3	3	6	2	2	0	5	2	2	2	1	1	0	4	0	1	2	3	1	4	2	2	1	0	4	0	3	1	1	0	3	4	4
	2	1	3	1	1	0	3	2	4	3	2	1	1	0	2	3	3	1	3	2	4	3	1	2	2	1	2	3	1	2	1	4	1	0	5	3	2	0	4	4	2	4	2	3	4	3	2	1	1
	2	0	3	0	0	0	0	1	2	4	3	2	2	2	1	5	0	1	1	2	0	2	2	2	3	0	2	3	3	0	2	2	2	0	1	1	3	1	2	3	0	2	3	0	1	1	1	2	3
	2	0	0	1	1	0	2	1	1	0	0	2	1	3	3	2	0	1	0	0	1	0	1	0	1	2	0	0	1	1	0	0	0	1	1	1	1	0	0	1	0	1	0	0	0	0	1	1	2
	1	0	0	0	0	0	1	0	0	1	0	0	0	1	1	1	0	0	1	1	0	0	0	1	0	1	0	0	0	1	0	2	0	0	1	0	1	1	0	0	0	0	0	0	0	0	0	1	0
	2	0	0	0	1	0	0	0	0	1	0	0	0	1	1	1	0	1	0	0	1	0	0	1	0	0	0	0	1	1	0	0	0	0	0	0	0	1	1	2	0	0	0	0	0	1	1	0	0
	1	1	1	2	1	0	1	2	0	1	0	0	0	0	0	1	0	3	1	2	2	1	2	0	1	0	0	2	3	2	2	0	0	3	0	3	0	0	2	0	0	0	1	1	0	0	0	0	0
	1	0	3	3	1	2	3	0	1	2	0	2	3	2	2	3	1	2	1	0	1	2	4	0	2	4	2	3	1	1	2	1	1	1	1	0	0	2	0	1	3	0	1	0	0	1	0	1	0
	0	1	0	1	1	1	1	2	1	0	2	0	1	0	2	0	0	0	3	2	1	1	0	0	0	1	0	0	1	1	1	0	0	0	0	0	2	2	0	1	0	2	2	0	1	0	0	1	0
	0	1	0	1	2	0	1	0	1	0	1	0	0	1	1	1	1	0	1	0	2	3	0	0	0	0	0	0	1	1	0	0	1	1	1	0	0	0	1	1	0	0	0	1	0	0	2	1	1
	1	0	0	0	1	0	0	1	0	1	2	1	1	2	0	1	3	3	3	3	0	0	1	0	1	0	1	1	2	0	0	0	1	0	0	0	2	1	1	0	2	0	0	0	2	0	0	1	0
	2	4	0	1	0	0	1	1	0	3	2	1	1	1	0	0	0	1	1	0	2	0	0	1	0	0	1	1	0	0	0	1	0	1	1	2	0	1	0	1	0	0	1	3	2	2	1	2	0
	3	4	2	3	2	2	1	7	3	5	5	4	3	4	3	3	2	3	2	2	5	4	2	2	3	1	1	1	1	4	2	2	0	1	0	2	0	1	4	3	3	4	2	5	1	3	6	1	6
	7	6	3	4	5	5	3	6	10	8	7	3	6	6	5	4	2	4	4	6	1	4	3	5	1	1	3	2	3	0	3	1	2	3	2	3	3	2	5	1	2	2	3	2	4	4	8	2	4
	3	2	1	1	2	3	2	1	4	4	3	4	1	1	7	5	5	1	4	5	6	5	4	1	1	5	2	2	7	3	6	5	4	3	6	5	6	3	4	8	3	6	7	3	3	1	4	6	9
	2	8	0	1	2	3	2	4	4	4	2	4	6	5	5	4	7	3	2	4	4	5	1	3	3	2	6	9	4	5	6	3	3	6	7	4	5	8	4	9	6	3	4	6	5	8	2	1	7
	1	2	3	1	4	5	0	3	5	15	3	7	3	2	5	6	6	12	4	3	4	2	6	3	3	7	5	2	6	2	4	6	6	4	6	7	4	5	3	6	2	5	6	8	7	6	6	4	7
	1	0	3	1	2	3	4	5	5	1	2	3	0	3	1	1	4	2	0	2	2	2	3	3	0	0	3	2	1	1	2	1	0	3	2	0	2	2	1	1	0	2	4	3	1	1	2	1	2
	0	2	2	2	0	3	1	2	3	1	0	0	5	4	1	3	1	4	3	3	1	0	0	3	0	0	2	2	1	1	1	0	2	0	1	2	0	1	2	1	2	3	1	0	1	5	1	3	0
	1	0	1	2	0	1	1	4	3	4	3	2	2	3	0	2	1	1	0	2	2	3	3	0	1	1	1	3	2	2	4	3	3	1	1	1	1	0	0	1	0	0	4	2	2	1	0	1	1
	1	3	3	3	4	8	6	11	23	11	2	1	0	7	4	5	3	5	4	5	3	0	2	3	5	3	3	7	3	4	6	4	5	8	2	4	4	3	5	1	2	5	2	1	2	3	2	2	3
	0	6	4	5	1	4	4	3	9	2	4	2	3	3	3	2	4	0	4	3	5	1	5	5	3	2	2	3	4	4	3	3	3	3	5	2	1	3	2	2	4	4	3	5	4	3	1	2	5
	2	2	3	4	2	3	1	3	7	3	3	1	4	1	3	1	1	0	3	2	0	3	1	2	2	0	3	4	0	3	3	3	0	4	2	1	2	1	3	1	1	2	2	5	2	2	0	1	2
	0	5	3	3	1	1	0	3	3	1	1	1	0	3	2	0	0	1	0	0	2	1	1	0	2	0	0	0	1	0	1	1	1	0	0	1	0	2	0	0	0	0	0	0	2	1	0	0	1
	0	3	1	2	3	1	1	0	2	4	3	4	1	1	1	2	1	0	0	0	1	1	2	1	1	2	0	2	0	0	0	2	1	1	3	1	1	0	1	0	2	1	0	0	1	2	1	1	1
	0	2	1	2	2	0	3	2	2	1	0	4	1	1	1	1	1	2	1	0	1	1	2	0	0	1	4	0	1	0	1	0	1	0	0	0	0	1	0	0	1	0	0	0	0	1	0	0	0
	2	2	1	2	3	1	2	1	1	1	1	0	1	1	0	0	1	3	0	0	0	1	1	2	0	1	2	1	0	0	0	1	0	0	0	0	0	1	0	0	0	0	0	0	0	2	1	1	0
	0	3	1	1	1	1	1	2	1	2	0	2	3	1	1	0	0	1	0	0	3	1	0	0	1	1	0	0	0	0	0	0	0	0	0	1	0	1	0	0	0	0	0	0	0	0	3	1	2
Avg	1.26667	1.64444	1.55556	1.57778	1.31111	1.48889	1.26667	2.35556	2.68889	2.44444	1.57778	1.77778	1.55556	1.6	1.64444	1.86667	1.53333	1.62222	1.57778	1.4	1.57778	1.37778	1.44444	1.24444	1.22222	1.35556	1.53333	1.55556	1.31111	1.37778	1.55556	1.44444	1.22222	1.31111	1.37778	1.53333	1.51111	1.31111	1.42222	1.6	1.26667	1.46667	1.51111	1.64444	1.4	1.42222	1.35556	1.26667	1.71111
Stderr	0.201749	0.293095	0.209672	0.177473	0.189666	0.254347	0.201749	0.373662	0.582831	0.429486	0.24157	0.272517	0.24595	0.257932	0.247207	0.241808	0.254302	0.321876	0.256101	0.257932	0.230632	0.213899	0.237401	0.206194	0.172754	0.223041	0.217042	0.28668	0.248596	0.201464	0.254212	0.235215	0.215343	0.276157	0.267543	0.239662	0.228682	0.22458	0.239423	0.297024	0.221285	0.283135	0.250252	0.282323	0.24138	0.260103	0.259441	0.206806	0.325599
WT- LRx
RS
LRx	-0.0320687	-0.026591	-0.0211134	-0.0156358	-0.0101582	-0.0046806	0.000797015	0.00627463	0.0117522	0.0172299	0.0227075	0.0281851	0.0336627	0.0391403	0.0446179	0.0500955	0.0555731	0.0610507	0.0665284	0.072006	0.0774836	0.0829612	0.0884388	0.0939164	0.099394	0.104872	0.110349	0.115827	0.121304	0.126782	0.13226	0.137737	0.143215	0.148693	0.15417	0.159648	0.165125	0.170603	0.176081	0.181558	0.187036	0.192513	0.197991	0.203469	0.208946	0.214424	0.219901	0.225379	0.230857
	4.5	1	1.5	1	3	3.5	2.5	4.5	3	3	1	0.5	2.5	0.5	0.5	1.5	2	2	0.5	0	4.5	2	2	1.5	3	0	1	1.5	4	1.5	3.5	3.5	3.5	6	4	2.5	2.5	1	4	2.5	4.5	1	2.5	2.5	5.5	4	3	4	3
	2	2	2	3	2	1	0.5	3	1.5	0.5	1	0.5	3.5	3	1.5	3	0.5	2.5	2	0	0	1.5	2.5	0.5	2	1	1	3.5	2.5	2.5	3	2.5	2	1	4	1	1	2.5	2	2.5	0.5	1	2	0.5	2.5	2.5	3.5	3	2.5
	3	1.5	1.5	1.5	3.5	2.5	2.5	2	4	1.5	2	2	2.5	3	3	2.5	6	4	2.5	1	3	3	3.5	3	2.5	1	1.5	3	2.5	2.5	6	3.5	2	2.5	7.5	3	4.5	3	4.5	2	3.5	4	2.5	7	5.5	2.5	3.5	3	3
	4.5	6	3	4	4	5.5	4.5	5.5	4	3.5	6.5	4	5.5	3.5	6	5.5	4.5	8	7	7.5	5.5	5	3	8.5	6.5	5.5	5	7.5	5	4	6.5	5.5	7.5	3	5	7	7.5	2.5	3.5	5	5.5	7.5	4.5	5.5	5	4	5	6.5	3
	3	1.5	2	0.5	2.5	0	3.5	2.5	2	2.5	0.5	0.5	2	1.5	2	2	1	1	0.5	1.5	4	0.5	2	1.5	1	2	2.5	4	2	2.5	3	0.5	1.5	3.5	1.5	1.5	3	1.5	1.5	1.5	2	2.5	6	1.5	2	2	2.5	1	1.5
	2.5	3.5	3.5	1.5	2.5	2.5	2	3.5	2	0.5	2	2	1	3	3.5	3	2	3	1.5	3	2.5	6	4.5	2.5	4.5	2.5	1	0.5	3.5	2	2	1.5	1.5	2	3	1.5	2	2	1	1.5	2.5	4	3.5	2	3	3	0.5	4	1
	0.5	3.5	1	1.5	3.5	2.5	2	3	6	5	2.5	1.5	1.5	4	1.5	2	3.5	3.5	3.5	3	3.5	3.5	5	6.5	1.5	4	4.5	2.5	3.5	3	1.5	0.5	3.5	2.5	3.5	2.5	3	4	1	5.5	3	2	2.5	1	3.5	1.5	2	1.5	1.5
	2.5	4	3	4	4.5	4.5	2.5	7.5	19	17.5	8	6.5	3	7	5	5.5	2.5	5.5	5.5	5.5	6.5	10.5	6.5	6.5	4.5	7.5	7.5	7.5	6	6	3	3.5	4.5	4.5	4.5	5.5	3.5	5	3.5	9.5	5	5.5	5	3.5	4.5	1	7.5	4.5	2.5
	9	10.5	7	8.5	13	8.5	12.5	11	5.5	5	5.5	4.5	5.5	5.5	4	7	7	8.5	9.5	9	17.5	16	14	13	13	19	16.5	15	16.5	23	15	16.5	16.5	16.5	14	12.5	12	11	12.5	11.5	10.5	6	10.5	10.5	6.5	12.5	11	9.5	10.5
	3.5	2.5	2.5	4.5	4	1.5	5	5	6.5	6	3.5	3	3	2	4.5	4	3	2.5	4	4	6	5	6	5	5	3	2	2.5	5	4	5	2	2.5	1.5	6	6	3	2.5	2	4	6	6	5	3.5	2.5	6.5	6.5	7	6
	3	4	0.5	7.5	2.5	1	5	3.5	7	3.5	1	3.5	1.5	4	3	3.5	2.5	1.5	3.5	2.5	1.5	4	3.5	8	4	3.5	3.5	3.5	3.5	3.5	0.5	1.5	1.5	2.5	2.5	0.5	1	3	3.5	1.5	2.5	2.5	1.5	4	4.5	1.5	4	4	5.5
	5	9	5	2	2.5	4.5	5	3.5	3	3.5	3	3.5	5	4	7	4	3.5	3.5	6	5	5	3	4.5	5	5.5	2.5	3	7	2.5	1.5	5.5	5	4.5	3.5	3	4	5	3	3	4	3	5.5	3.5	2	6.5	3.5	3	6	6
	2.5	4	3.5	1.5	3	5	5	4	6.5	2.5	4.5	3	4	4	4.5	3	2.5	3.5	6	5	6.5	4.5	4	2	4	4.5	2	4.5	2	2	4	1	4	1	4.5	2.5	2.5	1.5	3.5	4	4	6	3	2.5	1	3.5	1.5	2	3.5
	3.5	3	5	3.5	2	2	1	3	2.5	3	2.5	2	5.5	5	1.5	3	3	4	1	4.5	3	1.5	3.5	3.5	3.5	2	2.5	4	3.5	2	3.5	4.5	3	4	1.5	2.5	5	2.5	4	4.5	3.5	6	2	4.5	1.5	2.5	2	4	6.5
	6	6	6	5.5	8.5	5.5	5	4	5.5	3.5	2.5	4	3	2	2	5	4	3	4	4.5	6	3	6.5	7.5	5	4	8	3	5.5	6	3.5	3	4	5	4.5	3.5	3.5	6	4.5	5	2.5	4	7	5.5	3	3.5	3	8	6
	2.5	2.5	1.5	1	2	3	2	1	1	1	1.5	1.5	1.5	3	1.5	3.5	1	1	2	1.5	3.5	2.5	2	2.5	4.5	3.5	3	3.5	3.5	3	4.5	2.5	2	3.5	2	2.5	2.5	2	1	1	2.5	1	1.5	2	2.5	1	3	1.5	2
	2	1	0.5	1	0	1.5	1	0	1	1	1.5	1	0.5	0.5	2	0.5	1	1	1.5	3	0.5	1.5	0	1	1	1	1.5	1.5	0.5	0.5	1	2	1	1	1.5	0.5	1	1.5	2	2	2	0.5	0.5	2.5	0	1.5	1	1	1.5
	2	0	0.5	0.5	3	3.5	1	0	1	1.5	0.5	0.5	1	1.5	1.5	0.5	1	1	2	0	1.5	1.5	1	1	3.5	2.5	2	1.5	2	1	1.5	0.5	3	1	0.5	0.5	1.5	0.5	0.5	1	2	1.5	1.5	1	1	2	1.5	1	3
	1.5	1	1	1.5	1.5	0.5	0.5	0.5	1.5	1.5	0.5	0.5	0.5	0	1	1	0.5	0.5	0.5	0.5	1	1.5	1	1	3.5	1.5	1	1.5	0	0.5	3	2	2	4.5	0.5	0.5	3	0.5	1	2.5	0	0	0.5	0	1.5	1.5	1	0	0
	1	1	2.5	0.5	3	2.5	1.5	2	1	2	1	1.5	2	0.5	0.5	2	1.5	0.5	1.5	1.5	3	1	6	4	2.5	2.5	1.5	4.5	3	2.5	3	2	1.5	3.5	1.5	1.5	2.5	2	4.5	4.5	3.5	1	1	1.5	1.5	2.5	1.5	2.5	2.5
	2	1.5	2	2.5	0	0	2	1.5	1.5	1.5	5	2	3.5	1.5	3	1	1	2	1	1.5	3	2.5	2.5	4	3	2	4	3	2.5	2.5	1	2	2	2.5	0	2	1	0.5	0.5	1.5	1	1	1.5	2.5	2	1	2.5	1	1
	0.5	0.5	1	1	0.5	0	0.5	0	1.5	1	0	1.5	2	1	0.5	1	0.5	0.5	0.5	2	0	2	1.5	1.5	3	1	1	0.5	0.5	0.5	0.5	1.5	1	0	1	0	1.5	1	1	1.5	0	0	0	0.5	1	0.5	0.5	1	1
	5	6.5	4.5	5.5	7	5	3	3.5	5.5	6.5	2.5	1.5	4	1	2	4	5	4	1	6	2.5	5	4	3	10	4.5	4	2	4.5	2	3	3	3.5	1	1	2.5	2	2.5	2.5	3.5	2	1.5	4	1.5	1.5	2	1.5	2	2
	4.5	2.5	3	2.5	0.5	3	4.5	1	3.5	2	3	1.5	1.5	2	1	2.5	2.5	1.5	2	3	2.5	1.5	4	2.5	4	1	2	2	1	4	2.5	1	3.5	2.5	1.5	1.5	0.5	1	2	2	2	1	0.5	2	3	3	5	3	2.5
	1	3.5	2	4	3	0.5	1	1	2.5	3	1.5	1.5	2	1	3	1.5	3	2.5	3.5	1.5	1	3.5	1.5	3	3	1.5	0.5	1	1.5	1.5	1.5	2.5	1.5	0	1.5	0.5	1.5	1.5	2	2	1.5	3	2	2	2	2.5	2.5	3	4.5
	3.5	2.5	3	1.5	0.5	3	1.5	1.5	1.5	3.5	0.5	3.5	0.5	0	2.5	2	2	0.5	1.5	3	2	3.5	6	2	1	1.5	0.5	1.5	1.5	2	0.5	0.5	1	0	0.5	0.5	1.5	3	3.5	1	1.5	4	4.5	0.5	1	1.5	2.5	1	2
	2.5	1	0.5	0	3.5	3.5	2.5	0	2.5	1	1.5	1.5	4	1	3	2.5	1.5	0	0.5	0.5	0.5	3.5	1	2	2	1.5	1.5	1	2	0	2	2	2	1	0.5	1.5	2	1.5	2.5	1.5	1	2	4	0.5	0.5	2	1	0.5	2
	2.5	4.5	1.5	2	2	1	0	3	5	2	2.5	1	5.5	2	2.5	2	0	3	1.5	2	2	1.5	3	3	2.5	2.5	2.5	2.5	2.5	2	4.5	1	1	1	0.5	1.5	2	1	1	2	2	3	2.5	2	1	1.5	1	3.5	2
	2.5	2	1.5	2	1.5	1	0.5	2	4	2.5	5.5	1.5	4	4	1.5	3.5	2	2	1	1	3	1	4	3.5	2.5	3	2.5	3	1	3	2	2	0.5	1.5	2	2.5	1	2	3.5	0.5	1	2.5	3.5	1.5	1.5	3	2	0	1.5
	2	5.5	1.5	2	3	2.5	1.5	3.5	2.5	4	3	3	1.5	3	2	1	1.5	1	2	1	3	2	1	1.5	1.5	0.5	1.5	0.5	1	4	3.5	1	3	2	1.5	1	1.5	0.5	2.5	2	2	1.5	3	3.5	1	4	1	1.5	1
	3	2.5	4	1.5	2	3	2	4	28	22.5	15	17.5	6.5	3.5	4.5	2	2.5	3	2	2.5	4.5	4.5	4.5	7.5	5.5	5	3	3	1.5	4	1	1.5	2.5	3.5	0.5	2.5	2	1.5	2.5	1	1.5	2.5	2	2	3.5	3	2.5	1.5	1.5
	1.5	4.5	5	2	5.5	1	4	3	3	4.5	3.5	3	4.5	2.5	4.5	2.5	2	4.5	1.5	3.5	2	2.5	4	5.5	3	5	4.5	1	2	3.5	3.5	4	1.5	1	1	1.5	2	2	1.5	2	1.5	2	1.5	0.5	2	3	2.5	1.5	3.5
	1.5	2.5	3	2	3.5	4.5	1	2	2	5.5	7	1	6	6	5	5	2	3.5	4.5	4	4	1.5	4	1	1	2.5	4	2	1.5	1	5	0.5	3	3	2.5	2	1.5	1.5	2.5	2	0.5	2	2.5	1.5	1	3.5	2.5	1.5	2.5
	6	3.5	2.5	4.5	2.5	2.5	4.5	1	4.5	9	13.5	10.5	10.5	7.5	6.5	8	7	4.5	3.5	5.5	5.5	4	2	4.5	4.5	5	7	2.5	4.5	1	2	2.5	3.5	2.5	4.5	4	2	1.5	5.5	0.5	4.5	2.5	3.5	5	3	6	2.5	3	2.5
	1.5	3	1.5	1.5	3.5	1.5	2	4	1.5	1	1	2.5	2.5	5	4.5	2	4	3.5	2	3	2	2.5	1.5	2	2	6	3.5	2	3	2	1.5	2.5	1	1.5	2.5	1.5	3	4	2	1.5	2.5	5	2.5	2	5	1.5	3.5	2	1.5
	0.5	0.5	1.5	3	1	1	3.5	2	0	0.5	2	1.5	1.5	2	2.5	1	3	2	1.5	1.5	2	0.5	1	2	1	2	2.5	1	1.5	0.5	0.5	1	1	1	0.5	1.5	0	1.5	1	1.5	1.5	0.5	1.5	1.5	3.5	1.5	1	3	1
	1	0.5	1	2	1	3	2.5	2	1	3.5	2.5	4	2	1.5	2	1	1.5	1.5	2	1.5	1	1.5	2	2	1	1	2	0.5	2	1	1.5	1	1.5	1.5	0	2	2	2	2.5	1	1	2	1.5	3	1	2.5	0.5	0.5	2
	4.5	4	2.5	5	4	4	4.5	5.5	16	14.5	10.5	5	2	2	7	4.5	4.5	4.5	3	2	3	3	1.5	5.5	4.5	3	7	7	5.5	5	3	3.5	6	3.5	2	3.5	2	3.5	6	2.5	4	2.5	2.5	5	2.5	3	3.5	5	3
	5	2.5	6.5	6.5	3.5	5.5	2	4.5	6	4	6	2.5	3	5.5	2.5	6	4.5	4.5	4	4	2	5	6	3.5	6	4	7.5	2	4.5	5.5	4	5.5	5.5	6	6.5	4.5	4	7.5	3	8	5.5	4	6	4.5	5.5	3.5	4.5	5	8
	3.5	2	4	5	1.5	3	2	3	4.5	4.5	2.5	1.5	2	2.5	1.5	2	4	3.5	2	5	5.5	1.5	5	2.5	3	4	7.5	3	3	2	5	4	2.5	3.5	1.5	0.5	1.5	3	2	2.5	4	3.5	3.5	2.5	2.5	4	2	4.5	2.5
	1.5	0.5	1.5	0	0.5	0.5	0.5	2.5	0.5	0	0.5	0.5	0	0.5	0.5	1.5	0	0	1	0.5	0.5	1	0.5	1	0	0	1	1.5	1.5	1.5	0	1	1	1.5	1	1	0.5	0	1.5	2	0	1	1	1	1	1	1.5	2	0.5
	1.5	1	3	2	2.5	2	2	0.5	0	3	2	0.5	1	2.5	2	2.5	2	0.5	1.5	2	1	1	0.5	1.5	2	1	2.5	3	2	2	3	0	1	1.5	2	1	1	2	1	2	1.5	0.5	1	2.5	2	1	3	1	3
	1.5	0	1.5	1	0	0.5	2	1	0.5	1.5	2	1	1	1.5	0.5	1	1	0.5	0	1.5	0.5	0.5	0.5	0	1.5	0.5	0.5	2	1	1	1.5	1	0.5	0	1	1	0.5	0.5	0	2	0	0.5	1.5	0.5	1	2	1	0	1.5
	0	0	1	1.5	0	1	1	2	3	1	6.5	4.5	1	0.5	0.5	0.5	1	0.5	0.5	1.5	1	0	0.5	1	1.5	0	1	0.5	0.5	0	1	0	1	0.5	0.5	1	2.5	1.5	1.5	1	0.5	1	1	0.5	1	1	1	1	1
	2	2	4	6	2.5	2.5	4	4	3	4	9.5	3.5	0	1.5	2.5	2.5	2	1.5	1	3.5	2	2	1.5	3.5	5	4	2.5	4	0	1.5	3.5	3.5	1.5	1.5	2	3	1.5	4.5	3	2.5	2.5	3.5	6	1.5	4	2	2.5	3.5	5
Avg	2.76667	2.81111	2.57778	2.68889	2.78889	2.57778	2.64444	2.82222	4.15556	3.86667	3.55556	2.74444	2.81111	2.63333	2.74444	2.77778	2.5	2.55556	2.42222	2.78889	3.12222	2.97778	3.21111	3.4	3.43333	3	3.25556	2.97778	2.85556	2.81111	3.01111	2.47778	2.74444	2.57778	2.51111	2.34444	2.44444	2.41111	2.65556	2.77778	2.52222	2.66667	2.86667	2.51111	2.58889	2.71111	2.66667	2.78889	2.87778
Stder	0.265822	0.341019	0.248422	0.305886	0.351902	0.276468	0.320052	0.31375	0.769684	0.657207	0.512555	0.441466	0.312981	0.279	0.269211	0.266285	0.256123	0.288924	0.297613	0.303428	0.429466	0.412221	0.374652	0.391213	0.358126	0.451981	0.439414	0.388681	0.389898	0.516587	0.365933	0.38735	0.39089	0.394289	0.379446	0.328494	0.304165	0.299055	0.306111	0.341876	0.298479	0.288824	0.306355	0.303428	0.255765	0.295231	0.298065	0.328363	0.317839
WT- LRx
FS
Baseline	-0.0320687	-0.026591	-0.0211134	-0.0156358	-0.0101582	-0.0046806	0.000797015	0.00627463	0.0117522	0.0172299	0.0227075	0.0281851	0.0336627	0.0391403	0.0446179	0.0500955	0.0555731	0.0610507	0.0665284	0.072006	0.0774836	0.0829612	0.0884388	0.0939164	0.099394	0.104872	0.110349	0.115827	0.121304	0.126782	0.13226	0.137737	0.143215	0.148693	0.15417	0.159648	0.165125	0.170603	0.176081	0.181558	0.187036	0.192513	0.197991	0.203469	0.208946	0.214424	0.219901	0.225379	0.230857
	1	4	4	2.5	4.5	3.5	2	6.5	12	33.5	10	19	1.5	2	1	2	2	1.5	7.5	2	2	4	3.5	4	9.5	2.5	3.5	5.5	6	2.5	8.5	8	1	10	6	3	8.5	9	8.5	9.5	12.5	7	7.5	11.5	6	6	11.5	3.5	3
	2	4.5	1.5	0	1.5	1.5	2.5	3.5	14.5	33	10.5	11	0.5	1	1	3.5	0	3.5	3	0.5	2	4	0.5	2	2.5	1.5	2	2	3	2.5	5	5	2	3	3.5	2	7.5	5.5	5.5	4	4	3	7.5	4.5	2	5	4.5	1	2.5
	10	8.5	9.5	13.5	14.5	10.5	14.5	14.5	6.5	5	5	5	3	2.5	4.5	6.5	3.5	6.5	8	10	13.5	7	13.5	12.5	11.5	12	9	9.5	8.5	12	9	8.5	8.5	7.5	9.5	11	9.5	9	8.5	10.5	9.5	11	9.5	10.5	9	7.5	8	8	10
	4	3	3.5	4.5	3	3.5	5	4.5	5.5	9.5	13.5	15	19	6.5	5	5	2.5	1.5	2.5	2	4.5	4.5	4	7.5	6.5	6.5	3	4.5	4	3.5	5.5	4.5	2.5	5.5	3	3	4	3.5	3	2	2	2	6.5	1.5	3.5	2	5	2	2.5
	8	7	5	6.5	6.5	6.5	5.5	5	5.5	5.5	12	8.5	6	2.5	7	3	5	4	4.5	4.5	2.5	2	5.5	4.5	3	3.5	4.5	2	5.5	3	4	4	4	2	4	2.5	2	5	5	6	2.5	6	5	3.5	5.5	2	6	3	4.5
	10	5.5	5	6	4	6	4	8	7	5.5	7	7.5	3	2.5	2	2.5	4	1.5	1.5	2.5	2	3	3.5	3	4.5	5	5	4.5	7	5	7.5	4.5	4.5	6.5	5	6	5.5	3	4.5	3	8	3	5.5	5	7.5	3	1	7.5	5.5
	7	6	4.5	6.5	4.5	4	2	9	6	7.5	9	5	4	5	5	1.5	5.5	5.5	6	4.5	1.5	3	3.5	3.5	3.5	6.5	3	3.5	2	5.5	3	3.5	4.5	3	9	3	2.5	5	4	7.5	2	3	3	3	3	2.5	6	6	4
	4	5.5	6.5	6.5	5	4.5	4.5	6	5.5	8	6.5	3	7.5	6.5	4	3.5	6.5	3.5	6	5.5	4	2	5	3	7	6	4	7	6.5	5	4	7	5.5	2.5	3.5	3.5	5	4	4	5.5	5	6.5	4	2	2.5	7	3	3	4
	22	21.5	23.5	22.5	22	22	24.5	21.5	22	23.5	23.5	18.5	19.5	21.5	16	22.5	24	26.5	22.5	31	22.5	34	33	29.5	33.5	31	26.5	29	36	27	35	29.5	24.5	26.5	30	29	26	26	24.5	27.5	21	23.5	24.5	24	23	23.5	28.5	18	22.5
	1.5	4.5	4	3	2	2	5	2	6	7.5	6.5	5	1.5	1.5	1	3	1	2.5	4	3.5	3	2.5	5	4.5	3.5	4	4.5	4	2.5	2	2.5	3	3	3	2.5	2.5	3.5	5	3.5	2.5	3	2.5	1.5	2.5	3	2.5	3	2.5	2
	2	3	1.5	2	3	2.5	2	4	13	12.5	5.5	6.5	6.5	4.5	7.5	5.5	6	2.5	4	4	5	2	3.5	5	5	4	4.5	3.5	3	4.5	4	4.5	4	3	3	3.5	5.5	5	3.5	6.5	4.5	3	3	4.5	3	3.5	3.5	5.5	4
	10.5	3.5	4.5	6	4	4	4	3	9.5	9	6	7	9.5	8.5	10	12.5	11.5	10	9.5	11	12.5	11.5	10.5	11	6.5	11	13.5	11.5	9.5	9.5	9.5	9.5	5.5	7.5	6.5	4.5	9.5	10	9	7.5	6	7.5	7	6.5	7	6	7	4.5	3.5
	3.5	5.5	4.5	5.5	3.5	1.5	4	5	11	15.5	17.5	12	12	11.5	6.5	10	8.5	6.5	6	10	8	9	7	9.5	9	11.5	8.5	9	8.5	9	8	10	6.5	6.5	6	10	7.5	5	6	5.5	9.5	3.5	5.5	4	7	2.5	2	5.5	5
	13.5	12	11	11	12	10.5	12	16	8	10.5	9.5	12	8.5	9.5	9.5	9.5	11	6.5	10.5	7.5	10	11	10	15	15	16.5	13.5	18.5	19	14	16	19.5	18	15	16.5	11	14.5	12	11	15.5	11.5	12	12.5	11	13	13	18	13.5	14.5
	2.5	4	4	4.5	4	4	3.5	5	6.5	6	11	7	4.5	5	4	4	3	6	5	3.5	7.5	3.5	7.5	8	4	6	3	3.5	3	4	4	3.5	3	2.5	3	2	1.5	3.5	5.5	3	1	2.5	3.5	2.5	3	3	2.5	2	1.5
	2.5	6	3	3	4	3	1.5	4	8	6.5	5	5.5	6	7	5.5	6.5	3	5.5	3	5.5	8	14	4	6.5	3.5	5.5	3	4	3.5	6.5	4	3	2.5	4.5	2	5.5	5	4.5	4	3	3.5	1.5	1.5	2	1	1.5	4	0.5	2.5
Avg	6.83333	6.63333	6.1	6.7	6.4	5.83333	6.1	7.7	9.36667	12.7333	10.1	9.5	7.4	6.4	5.9	6.53333	6.4	6.06667	6.63333	6.93333	7.03333	7.63333	7.63333	8.3	8.3	8.6	7.1	7.83333	8.33333	7.56667	8.46667	8.3	6.43333	7.03333	7.36667	6.63333	7.6	7.33333	7.1	7.76667	6.83333	6.33333	7.06667	6.4	6.4	5.86667	7.36667	5.56667	5.96667
Stder	1.52334	1.26316	1.45704	1.47236	1.4779	1.40123	1.6791	1.4479	1.21792	2.56888	1.36389	1.31998	1.52128	1.37414	1.03534	1.45377	1.56019	1.63964	1.3604	1.97036	1.54645	2.20821	2.08154	1.87274	2.08481	1.98155	1.74613	1.95202	2.33303	1.71121	2.15914	1.92712	1.71642	1.71463	1.94337	1.85609	1.63523	1.5573	1.43143	1.73563	1.42559	1.53169	1.4905	1.57564	1.49079	1.53236	1.93416	1.27362	1.51225
WT- LRx
FS
LRx	-0.0320687	-0.026591	-0.0211134	-0.0156358	-0.0101582	-0.0046806	0.000797015	0.00627463	0.0117522	0.0172299	0.0227075	0.0281851	0.0336627	0.0391403	0.0446179	0.0500955	0.0555731	0.0610507	0.0665284	0.072006	0.0774836	0.0829612	0.0884388	0.0939164	0.099394	0.104872	0.110349	0.115827	0.121304	0.126782	0.13226	0.137737	0.143215	0.148693	0.15417	0.159648	0.165125	0.170603	0.176081	0.181558	0.187036	0.192513	0.197991	0.203469	0.208946	0.214424	0.219901	0.225379	0.230857
	1	3	3	2	2	2	2.5	2	6	4	3.5	2.5	2	1	2.5	3	3	4.5	2	2	2	2.5	1.5	3	4	4	2	6.5	3.5	2.5	3.5	2.5	2.5	5.5	3.5	3.5	1.5	3	2.5	1.5	2	4	3	4	2	1.5	2	4.5	1.5
	1	2.5	2.5	1.5	1.5	1.5	1.5	1	3	2	3	2.5	2	2.5	1	1.5	3.5	2	3.5	3.5	2.5	2.5	3	2.5	1	2	0.5	3.5	1.5	1	3	2.5	3	2.5	1.5	3	2	2	1.5	2	3	0.5	0.5	3	1.5	1.5	1.5	2.5	2.5
	0.5	2	3	1.5	2.5	2.5	1.5	2	2.5	2	1.5	0.5	2	4	2	2	0.5	1.5	1.5	1.5	0.5	2	0.5	1	1.5	1.5	3	1.5	1	1	1.5	1	4.5	3	0.5	1	0.5	1.5	1	2	1.5	2	1	1.5	0.5	2	1.5	2	1.5
	1	2.5	3	4.5	2	2	1.5	2	1.5	3	2	4	4	2	6.5	6	5	4.5	10.5	8	9.5	11.5	11	7.5	7.5	4.5	4.5	8.5	1.5	4	3	2.5	3.5	3.5	2	6	3.5	1	2.5	3.5	2	2	0	0.5	1.5	3	1.5	1.5	1
	2.5	2.5	2.5	3.5	5	5	3	3.5	4.5	13	4	7	3	2.5	1.5	2.5	1.5	0.5	1.5	3.5	3.5	4	4.5	2.5	6	5	6.5	4.5	5	3.5	3	4	2.5	2	6	3	3.5	4.5	1.5	3	2	2.5	2	2.5	3	1.5	2.5	3.5	2
	7	5	3.5	1.5	2.5	4.5	3.5	6	18.5	7	6.5	5.5	2	1.5	3.5	3	1	1	0.5	2	5	5	2.5	4.5	6	5	2.5	3	3	4	3.5	2.5	2	4	4	3.5	2.5	3	3.5	2.5	1.5	1	4	2	4	4	3	5	1
	8	8	6	5	8	6.5	6	9	19	10	11	5	3.5	3.5	3.5	5	3	4.5	4	9	6.5	7.5	6	10.5	16.5	10.5	9	13.5	10.5	8.5	10.5	6.5	8.5	8	7	7	7.5	7.5	9	8.5	7.5	7.5	4.5	6.5	3	6.5	6.5	5	8.5
	6	6.5	4.5	5.5	2.5	7.5	7	5.5	9.5	8.5	6.5	8	5	5.5	0.5	6	3	6	4	11	9	8.5	7.5	8	7	7	8	13	8.5	7.5	8.5	6	5	5	3.5	7.5	8.5	4	8	7	4.5	5	6	7	6	7.5	8.5	4.5	3.5
	6	4.5	5.5	7	5.5	5.5	5	3.5	5	7.5	3	4.5	1	3	1.5	2	3	4	0.5	3	2.5	2.5	2	2	2.5	4	3.5	8.5	2.5	4.5	7	7.5	4	3.5	6	9	4.5	7.5	6.5	4.5	6.5	8	5.5	8.5	4	6	6	5	5.5
	1.5	6.5	5.5	4	1.5	1	4.5	6	7	8.5	15	10	9.5	8	6.5	6	8.5	9.5	5.5	7	5	2.5	4	2.5	5.5	7.5	5	4	8.5	4	6.5	2.5	4.5	2	3	3	3	3.5	2.5	4	1.5	3	3	5	3	2	4.5	3.5	2.5
	7	4	3.5	3	5.5	7.5	5	6	10	5.5	7.5	3.5	9	6.5	5	4.5	4.5	6	5.5	6.5	8	4	4.5	7.5	7.5	4	6	7.5	7	3	4	5.5	5	2.5	4	2	4	3.5	2.5	2.5	2.5	2.5	3.5	3	3	3.5	8	4	4
	5	8	4	5.5	6	6	4.5	5	7	11	14	12	11.5	8.5	10	4	7.5	5	9	5.5	7.5	7.5	7	6.5	8	5	10	8.5	7.5	7.5	8.5	5	5	3.5	4	3.5	3	1.5	3	0.5	2	3.5	2.5	4	5	3	3.5	5.5	5
	6	2	4	2.5	2.5	4	2	2.5	6	14.5	13	14	15.5	15	12	10	6.5	7	10.5	4.5	6	6.5	5.5	8.5	7.5	9	8	7	7.5	3.5	4.5	4	5	1.5	4	4.5	2.5	2.5	4	4	1.5	2.5	3.5	2	2	3	3.5	2	3.5
	5.5	5.5	7.5	3	4.5	5	5	5	1.5	5	3	3	5.5	4	4	2	3.5	3	3.5	2.5	4	8.5	4	4.5	3.5	2.5	4	7.5	7	5	4.5	7	7	5	4	3	3	7.5	4.5	5.5	3	3	6	4.5	3	3	6	7	5
	3	3	5.5	2.5	4	4	3	3	7	6.5	5.5	5	2.5	4.5	3.5	1.5	5.5	2.5	3	1.5	3.5	4	4	3	4.5	5.5	6	3	5.5	3	4	1.5	5.5	2.5	0.5	2.5	3	3	1.5	4	3.5	3.5	2.5	8	3.5	1	3.5	2	4.5
	5.5	2.5	7.5	2.5	3.5	3.5	4.5	2	3.5	5.5	4.5	8	8	7.5	7	5	7.5	5	5	5	6	8.5	3	7	5.5	5	6.5	4	4	4	6	6	5	4.5	4	1.5	4	2	2.5	4.5	4.5	5.5	2.5	4.5	2.5	3.5	4.5	4	3.5
Avg	4	4.26471	4.41176	3.41176	3.58824	4.11765	3.82353	3.88235	6.91176	7.11765	6.47059	5.88235	5.14706	4.76471	4.20588	3.94118	4	4.05882	4.35294	4.67647	4.94118	5.29412	4.44118	5.02941	5.73529	5.05882	5.26471	6.35294	5.08824	4.02941	4.94118	4.08824	4.44118	3.61765	3.52941	3.88235	3.52941	3.67647	3.52941	3.64706	3.05882	3.44118	3.02941	4.05882	2.97059	3.23529	4.08824	3.76471	3.35294
Stder	0.644993	0.507979	0.398325	0.403198	0.470279	0.518278	0.416789	0.53679	1.2711	0.896531	1.07208	0.893258	1.03717	0.882908	0.818558	0.558811	0.610776	0.582764	0.779078	0.700085	0.646327	0.727607	0.629488	0.692412	0.878473	0.58777	0.648191	0.853262	0.727844	0.533031	0.623251	0.508205	0.416651	0.40391	0.449545	0.554684	0.48708	0.528377	0.573624	0.501491	0.443887	0.51136	0.447368	0.579403	0.332106	0.46376	0.554166	0.380475	0.489668
MMP-LRx
RS
Baseline	-0.0320687	-0.026591	-0.0211134	-0.0156358	-0.0101582	-0.0046806	0.000797015	0.00627463	0.0117522	0.0172299	0.0227075	0.0281851	0.0336627	0.0391403	0.0446179	0.0500955	0.0555731	0.0610507	0.0665284	0.072006	0.0774836	0.0829612	0.0884388	0.0939164	0.099394	0.104872	0.110349	0.115827	0.121304	0.126782	0.13226	0.137737	0.143215	0.148693	0.15417	0.159648	0.165125	0.170603	0.176081	0.181558	0.187036	0.192513	0.197991	0.203469	0.208946	0.214424	0.219901	0.225379	0.230857
	1.5	1	2.5	2	1	1	2	3.5	1.5	1	0.5	0	0.5	1.5	1.5	0.5	1.5	1.5	1.5	1	1.5	1.5	0.5	2	0.5	1.5	1	1	2	0	3.5	2	1	1.5	0.5	1	0	2	0	0.5	0.5	1.5	1.5	2	0.5	1.5	1	0	1
	1.5	2	2.5	1.5	1.5	0.5	2	2.5	2	1.5	4	0.5	4	3	1.5	2	4	2.5	2.5	1	3	2	4	1	2	6	3.5	1.5	2	1.5	3	1.5	3.5	1	1.5	1.5	0.5	3	1.5	2	0.5	2.5	1	0.5	0.5	1	1.5	3	2
	4	2.5	3.5	5.5	3.5	6	5	2	3.5	2.5	1.5	3.5	5.5	3.5	4.5	3.5	1.5	3	4	3	3	1	2.5	3.5	2.5	3	3	3	5	3.5	5	2	7	2	7	4	4.5	4.5	5	6	6	7.5	4.5	4.5	5.5	5	4	8.5	4
	0	3.5	4	0.5	1.5	2	0.5	1	4	1	1	0.5	0	0.5	1.5	0.5	2.5	1	3	2.5	0.5	2.5	0.5	0.5	2.5	1.5	3.5	2	1.5	0.5	1	2.5	0	1	2.5	2.5	1.5	1.5	4.5	2	0.5	1	2	3	1.5	2.5	2.5	1.5	2
	0.5	3	3	2	0.5	2.5	2	0	2	1.5	2	1	0.5	0	1.5	2	1	3	2	1.5	2.5	0.5	0.5	1.5	1	1	0.5	2.5	1.5	2.5	1.5	1	3	0.5	1.5	1	2	2	1	1	2	2.5	2	3	2.5	3.5	0.5	2.5	2
	2.5	3	1.5	0.5	2.5	1.5	3.5	0	2	1.5	2.5	1.5	1	2.5	0	2	1.5	1.5	1	1.5	1	1.5	1	2.5	2	1.5	1	1	2	4	2.5	2.5	0.5	2.5	2.5	1	1.5	1	4.5	1	5.5	3.5	2	2	1.5	3	2.5	1.5	2
	2	4	5	1.5	3.5	1.5	2.5	2	5	2.5	3	3	4.5	3	4	1.5	3	3	1.5	2.5	1.5	2	3.5	4.5	1.5	4	4.5	6.5	0.5	2	6.5	3.5	4.5	7	4.5	2.5	5	4	3.5	5	3.5	2	8.5	6	3	3	4	4	3.5
	6.5	2	2.5	3.5	3	2.5	3	3.5	2.5	2	3	3	2.5	2	3.5	2.5	1	3	3	2.5	5.5	3.5	3	1	1.5	2	3.5	2.5	5.5	2	5.5	4	3	3.5	2	2.5	2.5	4	3	2	0.5	2	3	5	2	3	3.5	3	3
	2.5	1.5	3.5	3	3.5	1.5	5	12	7	3	2.5	2.5	2	1	1	1.5	4	1.5	2	1	0.5	1.5	3.5	1.5	1	2.5	3	1	2.5	2.5	3	2.5	3	1	5	2	2	3.5	3	6	4.5	3	3	5.5	3	2.5	4	2.5	4
	2.5	4.5	2.5	3.5	3.5	3.5	2.5	8.5	9	8.5	6.5	1.5	3.5	1	3	1.5	2	3	1.5	2	3	1.5	2.5	3.5	3.5	3	1.5	4.5	2	2.5	2.5	3	6.5	3.5	3.5	3.5	6.5	6.5	7.5	4	2	4	2.5	3.5	6.5	1.5	4.5	1.5	3
	1.5	2	2.5	0.5	0	2.5	1	2	4	3.5	3	3.5	4	2.5	1.5	3	6.5	3.5	1	3	4	2	2	2.5	2	1	2	1.5	2.5	2.5	1	2.5	0.5	4.5	2	1.5	2	2	0.5	1.5	0.5	1.5	1	1	1.5	0.5	1.5	1	2.5
	3.5	3	2.5	1	3.5	4	5.5	3.5	6	2.5	5	1.5	4	5	2.5	3.5	3.5	2.5	2	2	3.5	1	1	4	2.5	3	1.5	4	4	1.5	3.5	1	4	4	3	5	4	2	5	4	2.5	6	5.5	4.5	5.5	2	4	4	4.5
	1.5	3.5	3	3	1.5	5.5	3.5	6	3.5	7	4.5	5	3	3	0.5	2	3.5	2	4	3.5	0	1	2.5	1.5	1.5	1.5	2	1.5	4	5	6	5.5	4.5	4.5	3.5	3.5	3	3	3.5	6	3.5	4	5	4.5	6	3	5	1.5	3.5
	2.5	2	2.5	4.5	4.5	5	3.5	6.5	11	9	6.5	8	7.5	7	3	2	4.5	4.5	3.5	3.5	3	2.5	3	3	4	3	4	2.5	4	4.5	6.5	4	5.5	3.5	4.5	4.5	5	2.5	6.5	5.5	5.5	8	3	6.5	2.5	1.5	4.5	3	2.5
	1.5	2.5	2	3	1.5	3.5	4.5	4	12.5	11.5	6	4	2	2	3.5	2.5	2	1.5	2.5	2.5	2.5	2.5	0.5	1	1	3.5	3	1.5	0.5	1.5	3	2	6	1	2.5	3.5	3.5	1	3	1	3.5	3	1.5	3.5	3.5	2	2.5	3	1
	0.5	3.5	0.5	1.5	0.5	1	2.5	2.5	3	1	1	1.5	2	4	2.5	1	1.5	1.5	2	0	1	3.5	1	2	0.5	0.5	1	2	0	1.5	1.5	0.5	1.5	1.5	0.5	2	2.5	1.5	1.5	1	0.5	2.5	2.5	2.5	1	2.5	3	2	1
	2	4	2.5	3.5	4	3	1.5	3	4.5	0.5	2.5	0.5	0	0.5	1	0	1	0.5	0	0.5	1.5	2	2.5	0	1.5	1	1.5	2	1	1.5	0.5	0	0.5	2	1.5	1	0.5	1	1	0.5	2	0.5	2.5	0	1.5	0	1.5	1.5	0.5
	3.5	1.5	1.5	1	1.5	2	1.5	2	2	2	1	3.5	0.5	1	1	0.5	1.5	0.5	1.5	2	2	0.5	1.5	1	1.5	0.5	1.5	1.5	0.5	3.5	0.5	3	1	0.5	2.5	1	1	0.5	0	1	2.5	2.5	1.5	3	3.5	1.5	1.5	2	0.5
	1.5	1	2	1	2	0.5	1	1.5	1.5	1.5	1.5	2.5	1	1	0.5	0.5	0	0.5	0.5	1	2	3	3	1.5	1	2	0	2	1	1	1.5	2.5	0.5	0	0.5	0.5	0	0.5	0	1.5	0	1.5	2	1	2	0	2	0.5	0
	1.5	1.5	0.5	2	1	4.5	2	2	2	2.5	1	0.5	1	1.5	0	1.5	1.5	1.5	0.5	0.5	1	0	0.5	1	1	1	2	0.5	0.5	1	0.5	1	1.5	0	0.5	1	1.5	0.5	0.5	1.5	0	0.5	0.5	1	1	1	1	1.5	2.5
	3	3	1.5	5	5	3.5	4	3	1.5	5	3.5	5.5	1.5	2.5	4	4.5	3	2.5	5	6	6	2.5	4.5	0	3.5	1.5	1	4.5	4.5	3.5	1.5	1.5	4.5	4	4	3.5	3.5	3.5	3.5	4.5	3.5	3	1	4.5	4.5	2	3.5	4	2.5
	2	3.5	6	3.5	1	1.5	1.5	4	2	2.5	1	1.5	2	1.5	4.5	4	1.5	1	3.5	1.5	1.5	1	3	3	4.5	2	1.5	3	2.5	5	3.5	4	1	3	2	3.5	2	5	4	3	3	1.5	4.5	3	3	4	1	1.5	2
	3.5	3	3	4.5	5.5	5.5	1.5	9	7.5	8.5	7	1.5	7	2	4.5	3.5	3.5	6.5	4	4.5	7.5	1.5	3.5	3.5	3.5	4	4	2	3.5	3	4	5	6	5	4	1.5	5	4.5	7	4.5	5	8	9	7	4	6	3.5	3	6
	2	2	3.5	4	2	4	3	6	3	4	4	5.5	3	4.5	2	6.5	3.5	4	3	1	1.5	1.5	2.5	3.5	3	4.5	3.5	4.5	2	1.5	2.5	4	5	2.5	4	4.5	1.5	0.5	3	1.5	4	4	1.5	3	1.5	4	0	2	2
	2	1	2	1	2.5	4	1	3	1.5	2.5	1.5	1.5	3	5	2	2.5	2	3	2	3	1.5	1.5	1.5	2	2	2	0.5	1	1	2.5	1.5	3.5	1.5	2	2.5	0.5	1	0.5	2.5	0.5	2	4	1	2	0.5	2.5	0.5	1	2.5
Avg	2.22	2.56	2.64	2.5	2.4	2.9	2.62	3.72	4.16	3.54	3.02	2.52	2.62	2.44	2.2	2.2	2.44	2.34	2.28	2.12	2.42	1.74	2.16	2.04	2.04	2.28	2.16	2.38	2.24	2.4	2.86	2.58	3.02	2.46	2.72	2.34	2.48	2.42	3	2.68	2.54	3.2	2.88	3.28	2.72	2.36	2.52	2.38	2.4
Stder	0.270159	0.206912	0.249165	0.309008	0.303338	0.332029	0.284556	0.584879	0.626193	0.608761	0.401257	0.399088	0.415916	0.342732	0.293151	0.303338	0.293624	0.285227	0.258669	0.278388	0.367612	0.181907	0.251247	0.256715	0.226154	0.278076	0.261406	0.293565	0.316118	0.273227	0.381335	0.28364	0.451156	0.359543	0.328189	0.282167	0.356585	0.340649	0.446825	0.399522	0.382926	0.438986	0.45	0.385366	0.363337	0.295393	0.299711	0.33886	0.281057
MMP-LRx
RS
LRx	-0.0320687	-0.026591	-0.0211134	-0.0156358	-0.0101582	-0.0046806	0.000797015	0.00627463	0.0117522	0.0172299	0.0227075	0.0281851	0.0336627	0.0391403	0.0446179	0.0500955	0.0555731	0.0610507	0.0665284	0.072006	0.0774836	0.0829612	0.0884388	0.0939164	0.099394	0.104872	0.110349	0.115827	0.121304	0.126782	0.13226	0.137737	0.143215	0.148693	0.15417	0.159648	0.165125	0.170603	0.176081	0.181558	0.187036	0.192513	0.197991	0.203469	0.208946	0.214424	0.219901	0.225379	0.230857
	0	0.5	1.5	0	1	0.5	1	1.5	0	1	1.5	1.5	2	1.5	1	0.5	2	3	2	6	2.5	0.5	1	1.5	1	2.5	1	0.5	2.5	0.5	1	0.5	1	0.5	1	0.5	0.5	0.5	2	2	2.5	4.5	2	4.5	6	3	2	4	1
	2	3	2.5	4	1.5	2.5	2.5	3.5	1	6.5	6	4.5	2.5	3	1	1.5	1.5	2.5	2	3.5	3.5	4.5	4.5	3	2	2.5	1.5	2	3.5	4	4	3	1.5	2	2.5	3	1	2	2	2.5	4.5	5.5	4	2.5	3	2.5	4	3.5	3
	3.5	4.5	4.5	2	5	6	6.5	4.5	3.5	3.5	5.5	4	3.5	3.5	5	4	6.5	8	4.5	6	4	2.5	6.5	4.5	4	1.5	7.5	4	3	4	2.5	7	5	5	6.5	5	4.5	2.5	2.5	2.5	2	6	5	5.5	3	3	3.5	2	1.5
	0.5	1	2.5	1.5	0	1	1	0.5	1	0.5	0	2.5	2.5	1.5	3.5	3	2.5	1	0.5	2.5	2.5	1	1	1.5	0.5	2.5	1.5	1.5	0	1	0.5	3	1	2	2.5	2.5	1	1	2	1.5	1.5	2	3.5	3	2.5	2	2	1.5	1.5
	2.5	0	3	0.5	0	2.5	0	2.5	2	1.5	2.5	2	1	1.5	2	1.5	0.5	0	1.5	1	0.5	0	1	1.5	1	1.5	0.5	2.5	2	2	0.5	3	1.5	0.5	1	2	0.5	0.5	1	2	0.5	1.5	1	1.5	0.5	0.5	0.5	0.5	3
	1.5	0.5	0	2	1.5	2.5	1.5	3	0.5	2.5	2	1	2.5	2	1.5	0.5	1	1	1	3	0.5	0.5	2.5	0.5	1.5	2	2	1.5	0.5	1.5	2.5	1	2	1	0.5	1.5	1	1.5	1	1.5	0.5	3	2	2	2	1	2	1	1
	4.5	2.5	1.5	5.5	4	2	3.5	6	4.5	3.5	3.5	2.5	2.5	2	2.5	1	2	1.5	2	4.5	1.5	3	1	3.5	1.5	3.5	2.5	2	2	2	3	2	4	3	1.5	2	1.5	2	3	3	2.5	3	3.5	2	2	3	5	2.5	5
	3.5	3	2.5	3.5	2.5	2	3.5	4	3	3	2.5	5	2.5	3.5	5.5	4	2.5	4	2	5.5	2.5	1	4	2.5	6	3.5	3.5	3.5	3.5	2.5	4	4.5	5.5	5	2.5	4.5	4	4	1	1.5	4.5	4	0.5	2	3.5	2.5	5.5	3	6
	2.5	4	3	2.5	1.5	3	4	10.5	10.5	6	2.5	2	1	0.5	4	3.5	3	0	2	3	3	0	2	1	2.5	2.5	4.5	3	3.5	1.5	4.5	4.5	4.5	4	2.5	2.5	8.5	4	4.5	5.5	1.5	2.5	4	6	3	4	3.5	3.5	1.5
	3.5	4	2.5	3.5	3	3.5	2.5	5	4.5	2	1	5	4	2.5	2.5	3	2	2	2	2	1	1.5	1.5	3	3.5	4	3	2.5	1.5	4	2.5	4	1.5	5	3	5	5.5	3.5	3.5	2.5	2.5	3	3.5	2	3.5	3.5	3	2.5	1.5
	1.5	2	2.5	2.5	2	1.5	1	2	1	1	0.5	1.5	2	4	3	2.5	3.5	2	0.5	3.5	2	1	2	1	1	4	0.5	2	2.5	0.5	0.5	1.5	1.5	2	0.5	4.5	1	2	1	0.5	2	2	1	1	1	0.5	3.5	3.5	1
	1.5	3	3	3	0.5	2	0.5	1	2.5	2	2.5	2	1	0	1	0.5	2	1.5	1.5	1.5	3	3	2	1	0.5	2	2	2.5	1	3	3.5	1	1.5	3	1	2	2	2.5	3.5	2.5	3	0.5	1.5	1	1	1.5	2	1.5	2.5
	2.5	4	3	2.5	1	1	2	4	11.5	5	2	6	1.5	3.5	1.5	4.5	2.5	2	3.5	2	2	4.5	3.5	3.5	2.5	2	2.5	0.5	4	4.5	1.5	2	3.5	2.5	1.5	0.5	2	4	1.5	3.5	2	3	1.5	1.5	2	1.5	3.5	1.5	2.5
	1.5	4.5	4	2.5	2	2.5	2.5	11.5	21.5	12	9.5	4	3.5	4	3	2	3.5	1.5	2	3.5	4	2	3	2	3.5	4.5	5	7.5	3	1.5	2.5	3.5	2	3.5	3.5	1.5	2.5	5	2	2	1	4	3	2.5	2.5	1	4.5	1.5	2.5
	2	2.5	1	1	2.5	2.5	2	3	4	2.5	2.5	3	3	1	0.5	2	3	2	1.5	1.5	2	1.5	1.5	1.5	2.5	4	3.5	1.5	3	1	2	2	3.5	3	3	2.5	1	3.5	2.5	1	1	1.5	1	1.5	1.5	3	3	2.5	2
	1.5	0.5	1.5	0	1	1	1.5	2	0.5	1	0	1	0.5	1.5	1.5	1	2.5	0	1	1	2	1	1.5	1	2	2	1.5	0	1.5	1	1.5	1.5	1.5	1	1.5	1	1.5	1	1	1	0.5	3	1	2.5	0	1	0.5	0.5	1
	1.5	0	1	1	1	0.5	1	0.5	1.5	0	0.5	1	0	1	1	0.5	1	2	0.5	2	0.5	0.5	1	0.5	3	2.5	1.5	2	2.5	4	0	1.5	2	2	1.5	0.5	1	0.5	3	2.5	3	1	3	1	1	1	3	0	3
	0.5	0	2	0	0.5	1.5	1.5	1.5	0.5	0.5	2	0.5	0.5	1.5	1.5	1	1.5	0.5	3	2	1.5	2.5	3	2.5	2	0.5	1.5	2	1	2	2.5	1.5	1.5	1	3	2	2.5	2	1.5	1.5	1.5	3	2	1.5	0.5	2	1.5	1.5	2.5
	0.5	2	1.5	0.5	0	0	1.5	5	2	0	0	0.5	0	0.5	0	0.5	0	0	0.5	0.5	0	0	1.5	1	0.5	1	1.5	1.5	1	0.5	1	1	1	1.5	2	0.5	1	2.5	2	3	2	3	2	0	0.5	0.5	1	0.5	3
	1	0	1	0.5	0	0	0.5	0	2.5	0.5	0	1	1	0.5	0.5	2	1	2.5	1.5	2	0	1	1.5	1	0	3	2	1	2.5	2	2	1.5	1	2	0.5	3	1	3.5	1.5	1.5	2.5	4	2	2	0.5	2	1.5	1	1.5
	6	5.5	6	5	8.5	4.5	3.5	8	5.5	7	7	6.5	9	5.5	7	5.5	5	3	6.5	3	6.5	3	5	4.5	2.5	4.5	2.5	5.5	6.5	4.5	5	5	4	4.5	4	5.5	5	6	6	7	7	7	6	9	6.5	6.5	4.5	6	5.5
	1	0	3	2	2	2	1.5	2	1	2.5	1	0.5	0.5	2	2	1	0.5	0.5	3	2	2	1	0.5	0.5	0.5	0.5	1.5	3.5	3	3	1.5	1	2.5	2	1.5	2	1	0.5	2	2.5	2	1	2	1.5	2	0.5	2.5	1.5	1
	6	3.5	8.5	8.5	5.5	7.5	4	7.5	6	7	8	4.5	5.5	4.5	3.5	5.5	6.5	6	4	4.5	5	3	8.5	4.5	5	5.5	3.5	6.5	4.5	3.5	3.5	3.5	7.5	5.5	2.5	6.5	5	3	5	4.5	1.5	4.5	5	7	6	7	8	10.5	9
	2	5	3	4.5	4.5	4.5	8.5	3.5	4	9	4	4	5	6	5.5	4.5	7	9.5	3	12	4	2.5	4	4.5	6	2.5	8	2.5	5	3.5	3	5	5	3.5	6.5	6	5	1.5	6	5.5	4	6	4.5	3	4.5	2.5	3.5	3	2.5
	0.5	1.5	3	1.5	0.5	1	2.5	3	3	1	1	1	2.5	3.5	6.5	2	5	2	1.5	2.5	2.5	0.5	2.5	1	2.5	2	1	0.5	2	1.5	0.5	1.5	1.5	2.5	2	1.5	2	1.5	1.5	1.5	1.5	2	2	1.5	1.5	2.5	2	1.5	1.5
Avg	2.14	2.28	2.7	2.4	2.06	2.3	2.4	3.82	3.9	3.24	2.7	2.68	2.38	2.42	2.66	2.3	2.72	2.32	2.12	3.22	2.34	1.66	2.64	2.1	2.3	2.66	2.62	2.48	2.6	2.36	2.22	2.62	2.68	2.7	2.32	2.72	2.46	2.42	2.5	2.58	2.28	3.22	2.66	2.7	2.4	2.32	3.02	2.42	2.64
Stder	0.327448	0.366903	0.354779	0.411425	0.422172	0.36799	0.390868	0.60659	0.951059	0.633361	0.534406	0.374861	0.409607	0.328982	0.400434	0.330719	0.395373	0.484911	0.287591	0.483297	0.322372	0.26958	0.392552	0.284129	0.338502	0.259741	0.392287	0.373237	0.300463	0.272463	0.281181	0.336289	0.358285	0.303338	0.321239	0.371605	0.418662	0.30288	0.306186	0.319613	0.302019	0.344954	0.302937	0.432009	0.370341	0.342174	0.344198	0.440643	0.390335
MMP-LRx
FS
Baseline	-0.0320687	-0.026591	-0.0211134	-0.0156358	-0.0101582	-0.0046806	0.000797015	0.00627463	0.0117522	0.0172299	0.0227075	0.0281851	0.0336627	0.0391403	0.0446179	0.0500955	0.0555731	0.0610507	0.0665284	0.072006	0.0774836	0.0829612	0.0884388	0.0939164	0.099394	0.104872	0.110349	0.115827	0.121304	0.126782	0.13226	0.137737	0.143215	0.148693	0.15417	0.159648	0.165125	0.170603	0.176081	0.181558	0.187036	0.192513	0.197991	0.203469	0.208946	0.214424	0.219901	0.225379	0.230857
	18	18	14	14	11	13	10.5	13.5	14	25.5	24	16.5	16	18.5	11	9.5	14.5	14	13	11.5	7	12.5	12	14	18.5	19.5	12	22	23.5	18.5	17	19.5	18.5	20	18	18.5	11	18.5	14.5	14	11.5	20	15	18.5	14.5	13.5	13	16	10
	1	1.5	1	1	1	0.5	1	2.5	1	1	2.5	1.5	0.5	1.5	1	0.5	1.5	1.5	1	2	2	2	2	0	2.5	2.5	2	1.5	1	4	2.5	1	3	2	1	2	0.5	1	2.5	0.5	0	2	3.5	2.5	2	0	1.5	4	1
	4	9.5	3	4	2.5	5	4.5	4	3	6	3.5	3	5	2.5	2	3.5	1.5	4.5	4.5	7	5.5	3.5	4	4.5	2.5	4.5	7.5	6	7.5	4	7	7	2.5	5	4	5.5	4.5	5.5	7	3.5	3.5	6.5	3	5.5	4.5	3.5	5	5	4
	3.5	5	6.5	4	5.5	4.5	11.5	9	13	8.5	8	4	8	7	8	9	6.5	6	5	7	6.5	5	7.5	8.5	4.5	6.5	9.5	7.5	8.5	5	8	4.5	5	4.5	7.5	5	7	7	5.5	6.5	5.5	4	7	6.5	7.5	6.5	9.5	8	7.5
	5	5.5	4.5	7	3.5	6	8.5	9.5	12.5	9	6.5	5	6.5	3	8.5	6.5	7.5	4.5	2	3	4	7.5	7.5	6.5	3.5	5	7.5	6.5	5.5	9	6	4	4	5	5.5	4	6	5.5	6	8	5.5	8.5	9	7.5	7	5.5	6.5	6.5	7
	5	2	4.5	4.5	4.5	2.5	2.5	7	10.5	11.5	5.5	6.5	10.5	6	7	11	9	7.5	11	12.5	5	4	4	4	3.5	2.5	5.5	5.5	3.5	3.5	3	4.5	5	4	5	4	4.5	8	2.5	5.5	5.5	5	4	4.5	5.5	8	4.5	6	5
Avg	6.08333	6.91667	5.58333	5.75	4.66667	5.25	6.41667	7.58333	9	10.25	8.33333	6.08333	7.75	6.41667	6.25	6.66667	6.75	6.33333	6.08333	7.16667	5	5.75	6.16667	6.25	5.83333	6.75	7.33333	8.16667	8.25	7.33333	7.25	6.75	6.33333	6.75	6.83333	6.5	5.58333	7.58333	6.33333	6.33333	5.25	7.66667	6.91667	7.5	6.83333	6.16667	6.66667	7.58333	5.75
Stder	2.69227	2.74742	2.01701	1.99875	1.55349	1.91181	1.9515	1.78559	2.49399	3.70068	3.54589	2.4059	2.34414	2.81218	1.75357	1.79258	2.19886	1.90088	2.17447	1.91137	0.812404	1.68967	1.60416	2.12014	2.79523	2.87663	1.52753	3.16754	3.55457	2.6064	2.3484	2.92147	2.70432	2.94534	2.62552	2.68328	1.54542	2.62075	1.97315	2.04287	1.67183	2.87634	2.05142	2.52982	1.89561	2.02814	1.81475	1.94122	1.39821
MMP-LRx
FS
LRx	-0.0320687	-0.026591	-0.0211134	-0.0156358	-0.0101582	-0.0046806	0.000797015	0.00627463	0.0117522	0.0172299	0.0227075	0.0281851	0.0336627	0.0391403	0.0446179	0.0500955	0.0555731	0.0610507	0.0665284	0.072006	0.0774836	0.0829612	0.0884388	0.0939164	0.099394	0.104872	0.110349	0.115827	0.121304	0.126782	0.13226	0.137737	0.143215	0.148693	0.15417	0.159648	0.165125	0.170603	0.176081	0.181558	0.187036	0.192513	0.197991	0.203469	0.208946	0.214424	0.219901	0.225379	0.230857
	8.5	7	12.5	10	9.5	9	4	8.5	3.5	12.5	7.5	7.5	6.5	7	3.5	6	5.5	4	3.5	4.5	7.5	6.5	9.5	4.5	7	7.5	8.5	9	8	9	6	9	6	8.5	8	7.5	5	10	9.5	9.5	8.5	10.5	7.5	5	6	10	5	9.5	6.5
	5.5	3	3	1	0.5	2	3	7	12	22.5	23.5	14.5	14.5	14.5	12	10	21.5	15	9.5	12.5	12.5	14	17.5	10	12	9.5	8.5	10	8	11	10.5	9.5	7	9	7.5	7	6	6.5	5.5	4	3	2.5	4	3	2	1.5	2	5	3
	8.5	7.5	8.5	9	7.5	5	5.5	6.5	7.5	3.5	3	4.5	1.5	1.5	1.5	2.5	4.5	3.5	4	4.5	7	6	6.5	6.5	5	6	3.5	4.5	7	4.5	5.5	5	10	8.5	7.5	6	5.5	9.5	7	8	4.5	7	7	5.5	7.5	9	9	5	7
	8	4.5	4.5	5	4	8.5	5.5	6.5	7	4.5	6.5	6	7	3	6	3.5	4	4	3.5	2.5	4	4.5	3	4.5	6	4	3	6.5	3	5.5	6	5.5	4.5	7.5	3	5.5	3.5	6.5	4	4.5	5.5	4.5	4	5	3.5	5.5	4.5	4.5	7
	6	5	3	5.5	6.5	5	4.5	3.5	4	7	4.5	4	3	2	4	3	4	4	4.5	3.5	4.5	4	3.5	1.5	4	4	1	2	1.5	3	1	5.5	5	2.5	4	3.5	2	2.5	2	2.5	5.5	4.5	6	2.5	5.5	4	3	4	8.5
	4.5	5	5	5	3.5	8.5	5	4	9	7.5	10.5	4.5	5.5	6	4.5	3	6.5	4.5	3	5	6	6.5	7.5	7.5	9.5	9.5	11	6	7.5	5	6	5.5	5	3	1.5	8	4	4	3	5	3	4.5	3	3.5	3	3.5	3	3.5	3
	6.83333	5.33333	6.08333	5.91667	5.25	6.33333	4.58333	6	7.16667	9.58333	9.25	6.83333	6.33333	5.66667	5.25	4.66667	7.66667	5.83333	4.66667	5.41667	6.91667	6.91667	7.91667	5.75	7.25	6.75	5.91667	6.33333	5.83333	6.33333	5.83333	6.66667	6.25	6.5	5.25	6.25	4.33333	6.5	5.16667	5.58333	5	5.58333	5.25	4.08333	4.58333	5.58333	4.41667	5.25	5.83333
	0.770281	0.743864	1.66983	1.44511	1.44049	1.24633	0.433974	0.848528	1.41892	3.15727	3.32791	1.77576	2.0232	2.17102	1.6171	1.29357	3.06159	2.01329	1.08321	1.6026	1.36687	1.62121	2.36819	1.30958	1.33978	1.12027	1.76305	1.30894	1.27017	1.35401	1.3466	0.90185	0.913783	1.31909	1.23895	0.731437	0.658281	1.31909	1.23828	1.17828	0.916515	1.25233	0.821584	0.555278	0.931844	1.4793	1.11729	0.966954	1.02632
WT + LRx
Baseline								LRx
Freq	1	4	8	12	30	60			1	4	8	12	30	60
Range	4	8	12	30	60	120			4	8	12	30	60	120
	0.200834	0.33777	0.155044	0.188747	0.086885	0.0583717			0.289824	0.353636	0.145706	0.149895	0.0604486	0.0324533
	0.204071	0.353871	0.176085	0.186379	0.0819492	0.0386596			0.243769	0.348521	0.17377	0.1777	0.0711338	0.0306309
	0.186028	0.370034	0.209877	0.192824	0.0672298	0.030008			0.217373	0.364085	0.197305	0.184898	0.0606122	0.0278011
	0.203184	0.342728	0.181651	0.175671	0.082084	0.0543951			0.304642	0.322338	0.153788	0.157276	0.0667891	0.0325254
	0.193288	0.329781	0.170371	0.200689	0.0940271	0.0486937			0.204385	0.346153	0.178502	0.186225	0.0891021	0.0398974
	0.183063	0.335134	0.185062	0.209547	0.0891691	0.041937			0.196075	0.299641	0.145633	0.226986	0.110588	0.0462892
	0.282915	0.31618	0.148733	0.166958	0.0813848	0.037191			0.281687	0.353122	0.164506	0.172781	0.0558918	0.0218412
	0.149228	0.301021	0.17837	0.24537	0.113047	0.0467346			0.236286	0.372661	0.178697	0.162722	0.067391	0.0288115
	0.269728	0.294678	0.149422	0.163529	0.0877568	0.0553661			0.263758	0.289212	0.13878	0.168059	0.0965139	0.0565101
avg	0.208038	0.331244	0.172735	0.19219	0.0870592	0.0457063		avg	0.247533	0.338819	0.164076	0.176283	0.0753856	0.0351956
MMP+LRx
Baseline								LRx
Freq	1	4	8	12	40	60			1	4	8	12	40	60
Range	4	8	12	30	60	120			4	8	12	30	60	120
	0.191952	0.299738	0.179734	0.210331	0.0855231	0.0519013			0.295273	0.332435	0.153201	0.165267	0.0573266	0.0210186
	0.166	0.263222	0.165072	0.22141	0.123247	0.0674841			0.164697	0.270463	0.166338	0.267635	0.0995176	0.0497728
	0.239052	0.406577	0.168025	0.1496	0.0424438	0.0195044			0.182262	0.356622	0.181418	0.198298	0.077906	0.0391266
	0.154819	0.330067	0.169573	0.190697	0.0981996	0.0734555			0.174481	0.300918	0.1567	0.187486	0.108101	0.0760295
	0.16153	0.313492	0.201687	0.224802	0.0959006	0.0423326			0.154306	0.320147	0.204144	0.226273	0.0926042	0.0443252
	0.226732	0.298497	0.142332	0.18103	0.0980659	0.0629181			0.18883	0.315507	0.150897	0.183438	0.0995241	0.0679968
avg	0.190014	0.318599	0.17107	0.196312	0.0905633	0.0529327		avg	0.193308	0.316016	0.168783	0.204733	0.0891632	0.0497116
[truncated: 13 more columns]
