# Supplementary material for: Light reintroduction after dark exposure reactivates plasticity in adults via perisynaptic activation of MMP-9
Source: eLife. 2017 Sep 6;6:e27345. doi: 10.7554/eLife.27345 (PMC5630258; doi:10.7554/eLife.27345)
Supplement: Figure 6—source data 1. [file elife-27345-fig6-data1.xlsx]

## Sheet: 6A
	WT				WT+DE
	Baseline	3d MD	7d MD		Baseline	3d MD	7d MD
	107.086		173.905		73.5563	98.0221	89.2114
	97.3073		131.088		62.8088	94.858	76.2799
	83.2166	125.868	139.917		84.0287	140.418	148.89
	46.84	83.4056			101.419	109.696	153.683
	67.2983	61.6436	76.9677		142.342	161.277	223.798
	108.905	129.994	153.205		60.8733	110.491	113.616
	24.2953	31.0194	34.5829		55.9063	102.497	138.712
	39.3169	62.2696	66.0485		69.2648	130.368
	70.4456	85.9598	82.8586
	75.4166	90.5016	94.8463
	36.1812	25.4744	41.5961
	54.4758
avg	67.5654	77.3485	99.5015		81.2748	118.453	134.884
stder	8.49234	12.9427	15.9258		10.83	8.83768	20.0296
	MMP				MMP+DE
	Baseline	3d MD+sal	7d MD+sal		10d DE	3d MD+sal	7d MD+sal
	205.643	175.727	184.888		100.745	94.5116	125.34
	111.348	108.462	101.262		127.127	175.992	185.527
	165.479	159.961	176.962		171.085	206.262	127.841
	127.841	144.21	131.459		144.97	135.963	128.184
	91.7606	99.5923			123.35	108.792	100.948
	73.2502	79.6126	116.877
avg	129.22	127.928	142.29		133.455	144.304	133.568
stder	21.9202	16.843	18.4783		13.1356	23.2553	15.599

## Sheet: 6B
WT	dep		non-dep			KO	dep		non-dep
	diameter	density	diameter	density			diameter	density	diameter	density
	0.698462	0.395137	0.6975	1.20401			0.852667	0.701754	0.736667	0.464396
	0.698462	0.454545	0.706429	0.942761			0.735385	0.608696	0.688571	0.670103
	0.645	0.463576	0.81	0.801394			0.768235	0.666667	0.7175	0.609319
	0.711111	0.654545	0.762642	1.39108			0.592353	0.559441	0.6575	0.448549
	0.695789	0.59375	0.693939	1.17857			0.55	0.676329	0.823571	0.774648
	0.721	0.526316	0.732667	1.00671			0.68871	0.974843	0.699167	0.585366
	0.870588	0.656371	0.7032	1.02041			0.690952	0.780669	0.645833	0.512821
	0.8	0.412844	0.653077	1.28079			0.8025	0.481928	0.7375	0.487805
	0.595263	1.02703	0.7944	0.796178			0.7725	0.362538	0.6725	0.597015
	0.58	0.5	0.754815	0.971223			0.766471	0.702479	0.773158	0.567164
	0.625833	0.472441	0.698214	1.11554			0.622667	0.738916	0.5825	0.784314
	0.814545	0.306407	0.726667	0.916667			0.652222	0.466321	0.595833	0.365854
	0.706	0.609756	0.734375	0.599251			0.691765	0.521472	0.761667	0.398671
	0.758889	0.44335	0.95	0.461538			0.77	0.443864	0.7225	0.806452
	0.657857	0.669856	0.733421	1.15152			0.759444	0.550459	0.670714	0.454545
	0.642727	0.413534	0.882174	0.605263			0.786667	0.765306	0.783571	0.588235
	0.80875	0.48048	0.619722	1.16505			0.670714	0.454545	0.7575	0.57971
	0.630625	0.632411	0.565926	1.14894			0.670714	0.289855	0.717826	0.716511
	0.691765	0.44335	0.744091	0.833333			0.783333	0.33241
	0.797857	0.608696					0.606667	0.528169
