# Supplementary material for: Light reintroduction after dark exposure reactivates plasticity in adults via perisynaptic activation of MMP-9
Source: eLife. 2017 Sep 6;6:e27345. doi: 10.7554/eLife.27345 (PMC5630258; doi:10.7554/eLife.27345)
Supplement: Figure 7—source data 1. [file elife-27345-fig7-data1.xlsx]

## Sheet: 7B
	WT Con	WT LRx	KO Saline	KO Hyl
	95.1534	48.3708	92.654	49.2332
	56.234	40.0476	95.2355	53.4404
	86.2812	53.2555	95.9177	47.5019
	131.679	36.0446	105.794	40.8828
	130.653	66.3927	110.83
mean	100	48.8223	100.086	47.7646

## Sheet: 7C-E
	RS Spike Rates			FS Spike Rates
	Before	7d Hyl		Before	7d Hyl
	4.055	3.89		8.36	9.235
	3.66	4.105		4.905	7.455
	6.685	4.435		4.23	12.765
	0.98	3.23		2.305	6.71
	0.855	1.755		4.555	3.925
	0.975	1.36		11.695	4.41
	1.01	2.48		7.86	2.625
	0.87	1.305		9.335	4.16
	0.69	2.9		6.3	20.995
	2.395	3.36			5.74
	2.405	5.26			9.385
	2.245	4.245			8.565
	4.275	5.31			7.475
	2.66	2.86
	3.415
	3.085
	8.24
	4.04
	2.715
Before								After
MMP + Hyl	1	4	8	12	30	60		MMP + Hyl	1	4	8	12	30	60
	4	8	12	30	60	120			4	8	12	30	60	120
	0.12813	0.268606	0.162553	0.219694	0.141723	0.0916047			0.106735	0.231685	0.150035	0.233397	0.16357	0.105088
	0.191821	0.381322	0.193478	0.168927	0.0766303	0.0388967			0.168667	0.389168	0.188576	0.192916	0.0691233	0.0372696
	0.171303	0.317871	0.17645	0.208697	0.119257	0.0472702			0.157247	0.290607	0.176332	0.233474	0.118417	0.0560753
	0.137632	0.350682	0.202479	0.220814	0.0911824	0.0465346			0.126379	0.317376	0.215132	0.239879	0.0938831	0.0521493
	0.129879	0.291158	0.185211	0.237136	0.121894	0.0614644			0.127651	0.223096	0.149593	0.253822	0.128468	0.0657944
	0.335726	0.271243	0.130923	0.159087	0.0757185	0.0431001			0.203947	0.330241	0.168786	0.187767	0.0798998	0.0499105
avg	0.182415	0.31348	0.175182	0.202392	0.104401	0.0548118		avg	0.148438	0.297029	0.174742	0.223542	0.108893	0.0610478
WT+LRx	1	4	8	12	30	60		MMP + Hyl	1	4	8	12	30	60
	4	8	12	30	60	120			4	8	12	30	60	120
	0.289824	0.353636	0.145706	0.149895	0.0604486	0.0324533			0.106735	0.231685	0.150035	0.233397	0.16357	0.105088
	0.243769	0.348521	0.17377	0.1777	0.0711338	0.0306309			0.168667	0.389168	0.188576	0.192916	0.0691233	0.0372696
	0.217373	0.364085	0.197305	0.184898	0.0606122	0.0278011			0.157247	0.290607	0.176332	0.233474	0.118417	0.0560753
	0.304642	0.322338	0.153788	0.157276	0.0667891	0.0325254			0.126379	0.317376	0.215132	0.239879	0.0938831	0.0521493
	0.204385	0.346153	0.178502	0.186225	0.0891021	0.0398974			0.127651	0.223096	0.149593	0.253822	0.128468	0.0657944
	0.196075	0.299641	0.145633	0.226986	0.110588	0.0462892			0.203947	0.330241	0.168786	0.187767	0.0798998	0.0499105
	0.271687	0.353122	0.164506	0.172781	0.0558918	0.0218412		avg	0.148438	0.297029	0.174742	0.223542	0.108893	0.0610478
	0.236286	0.372661	0.178697	0.162722	0.067391	0.0288115
	0.263758	0.289212	0.13878	0.168059	0.0965139	0.0565101
avg	0.247533	0.338819	0.164076	0.176283	0.0753856	0.0351956
	MMP					MMP+Hyl
	Baseline	3d MD	7d MD			Baseline	3d MD	7d MD
	205.643	175.727	184.888			170.434	154.863	224.411
	111.348	108.462	101.262			134.197	152.136	181.025
	165.479	159.961	176.962			158.679	157.59	193.234
	127.841	144.21	131.459			129.867	142.458
	91.7606	99.5923				138.001	153.503	161.311
	73.2502	79.6126	116.877			91.839	135.162	147.555
						116.08	148.398	171.408
						113.931		131.344
avg	129.22	127.928	142.29		avg	131.629	149.158	172.898
stder	21.9202	16.843	18.4783		stder	9.50404	3.21781	12.5152

## Sheet: 7G
KO Hyl	dep		non-dep
	diameter	density	diameter	density
	0.481429	0.327103	0.638947	0.719697
	0.58	0.290909	0.749412	0.702479
	0.695882	0.618182	0.685	1.15385
	0.73	0.769231	0.731667	0.989011
	0.727692	1.22066	0.712069	1.02473
	0.65	0.852018	0.708571	1.26697
	0.709091	0.470085	0.7725	0.873362
	0.657692	0.494297	0.770526	0.756972
	0.692143	0.520446	0.743158	0.772358
	0.66	0.447761	0.682	0.862069
	0.65125	0.412371	0.7835	0.934579
	0.633636	0.462185	0.87375	0.909091
	0.730769	0.572687	0.767	0.917431
	0.602	0.543478	0.750769	1.2093
	0.855	0.300752	0.788125	0.56338
	0.821429	0.299145	0.703333	0.947368
	0.777857	0.729167	0.766111	0.810811
	0.703889	0.81448	0.768125	0.846561
	0.646154	0.718232	0.774	0.545455
	0.846667	0.41958	0.6275	1.32701
			0.773333	1.21387
